# Supplementary material for: Spacing of cue-approach training leads to better maintenance of behavioral change
Source: PLoS One. 2018 Jul 30;13(7):e0201580. doi: 10.1371/journal.pone.0201580 (PMC6066248; doi:10.1371/journal.pone.0201580)
Supplement: S1 File — (CSV) [file pone.0201580.s001.csv]

subjid	scanner	order1	order2	block	runtrial	onsettime	ImageLeft	ImageRight	TypeLeft	TypeRight	IsLefthigh	Response	PairType	Outcome	RT	bidIndexLeft	bidIndexRight	bidLeft	bidRight	session	recency	sample
BM2_654	0	1	1	1	1	0	MilkyWay.bmp	Oreos.bmp	11	12	1	i	1	0	0.861194	7	6	1.38	1.493333	2	day2	1
BM2_654	0	1	1	1	2	9	Cheetos.bmp	Hersheykisses.bmp	24	23	0	u	4	0	1.068427	27	28	0.68	0.553333	2	day2	1
BM2_654	0	1	1	1	3	12	SourSkittles.bmp	Oreos.bmp	11	12	1	u	1	1	1.011465	3	6	1.74	1.493333	2	day2	1
BM2_654	0	1	1	1	4	17	Skittles.bmp	Twix.bmp	14	13	0	x	2	NA	NA	13	16	1.026667	0.893333	2	day2	1
BM2_654	0	1	1	1	5	26	Chocolate_mm.bmp	Fritos.bmp	22	21	0	i	3	1	0.747736	22	21	0.773333	0.793333	2	day2	1
BM2_654	0	1	1	1	6	32	Cheezits.bmp	Skittles.bmp	13	14	1	i	2	0	0.546493	14	13	0.906667	1.026667	2	day2	1
BM2_654	0	1	1	1	7	35	Snickers.bmp	Hersheymilk_several.bmp	22	21	0	u	3	0	0.681506	20	17	0.833333	0.88	2	day2	1
BM2_654	0	1	1	1	8	48	Hersheykisses.bmp	Sourpatch.bmp	23	24	1	i	4	0	0.644778	28	26	0.553333	0.72	2	day2	1
BM2_654	0	1	1	1	9	58	Cheezits.bmp	PopTartsCinnamon.bmp	13	14	1	i	2	0	0.632279	14	12	0.906667	1.026667	2	day2	1
BM2_654	0	1	1	1	10	63	Sourpatch.bmp	FrootLoops.bmp	24	23	0	u	4	0	0.561355	26	30	0.72	0.446667	2	day2	1
BM2_654	0	1	1	1	11	66	Ghiradelli_milk_Almonds.bmp	PopTartsStrawberry.bmp	24	23	0	i	4	1	0.832576	29	24	0.54	0.746667	2	day2	1
BM2_654	0	1	1	1	12	69	100grand_small.bmp	Jollyrancherred.bmp	14	13	0	i	2	1	0.720144	15	10	0.893333	1.226667	2	day2	1
BM2_654	0	1	1	1	13	72	FrootLoops.bmp	Cheetos.bmp	23	24	1	i	4	0	0.703885	30	27	0.446667	0.68	2	day2	1
BM2_654	0	1	1	1	14	82	Milano.bmp	FamousAmos_small.bmp	11	12	1	u	1	1	0.635371	9	5	1.28	1.52	2	day2	1
BM2_654	0	1	1	1	15	85	ChipsAhoy_small.bmp	SourSkittles.bmp	12	11	0	i	1	1	0.682405	8	3	1.366667	1.74	2	day2	1
BM2_654	0	1	1	1	16	95	Hersheymilk_several.bmp	Chocolate_mm.bmp	21	22	1	i	3	0	0.957933	17	22	0.88	0.773333	2	day2	1
BM2_654	0	1	1	1	17	98	Twix.bmp	100grand_small.bmp	13	14	1	i	2	0	0.813669	16	15	0.893333	0.893333	2	day2	1
BM2_654	0	1	1	1	18	101	ChipsAhoy_small.bmp	Milano.bmp	12	11	0	i	1	1	0.620688	8	9	1.366667	1.28	2	day2	1
BM2_654	0	1	1	1	19	105	Riprolls.bmp	Hersheymilk_several.bmp	22	21	0	i	3	1	0.872716	19	17	0.846667	0.88	2	day2	1
BM2_654	0	1	1	1	20	109	ChipsAhoy_small.bmp	MilkyWay.bmp	12	11	0	u	1	0	0.694186	8	7	1.366667	1.38	2	day2	1
BM2_654	0	1	1	1	21	113	MilkyWay.bmp	FamousAmos_small.bmp	11	12	1	i	1	0	0.634223	7	5	1.38	1.52	2	day2	1
BM2_654	0	1	1	1	22	119	FamousAmos_small.bmp	SourSkittles.bmp	12	11	0	i	1	1	0.713004	5	3	1.52	1.74	2	day2	1
BM2_654	0	1	1	1	23	123	Jollyrancherred.bmp	Skittles.bmp	13	14	1	i	2	0	0.805743	10	13	1.226667	1.026667	2	day2	1
BM2_654	0	1	1	1	24	132	PopTartsStrawberry.bmp	Sourpatch.bmp	23	24	1	i	4	0	0.764247	24	26	0.746667	0.72	2	day2	1
BM2_654	0	1	1	1	25	140	Milano.bmp	Oreos.bmp	11	12	1	u	1	1	0.741067	9	6	1.28	1.493333	2	day2	1
BM2_654	0	1	1	1	26	144	HoHo.bmp	Riprolls.bmp	21	22	1	u	3	1	0.673798	23	19	0.746667	0.846667	2	day2	1
BM2_654	0	1	1	1	27	147	Ghiradelli_milk_Almonds.bmp	FrootLoops.bmp	24	23	0	u	4	0	0.992826	29	30	0.54	0.446667	2	day2	1
BM2_654	0	1	1	1	28	151	Snickers.bmp	HoHo.bmp	22	21	0	i	3	1	0.637573	20	23	0.833333	0.746667	2	day2	1
BM2_654	0	1	1	1	29	154	PopTartsStrawberry.bmp	Cheetos.bmp	23	24	1	i	4	0	0.605301	24	27	0.746667	0.68	2	day2	1
BM2_654	0	1	1	1	30	158	Jollyrancherred.bmp	PopTartsCinnamon.bmp	13	14	1	u	2	1	0.689338	10	12	1.226667	1.026667	2	day2	1
BM2_654	0	1	1	1	31	161	Twix.bmp	PopTartsCinnamon.bmp	13	14	1	i	2	0	0.759835	16	12	0.893333	1.026667	2	day2	1
BM2_654	0	1	1	1	32	167	Ghiradelli_milk_Almonds.bmp	Hersheykisses.bmp	24	23	0	u	4	0	0.991829	29	28	0.54	0.553333	2	day2	1
BM2_654	0	1	1	1	33	170	Snickers.bmp	Fritos.bmp	22	21	0	i	3	1	0.647588	20	21	0.833333	0.793333	2	day2	1
BM2_654	0	1	1	1	34	174	HoHo.bmp	Chocolate_mm.bmp	21	22	1	i	3	0	0.851626	23	22	0.746667	0.773333	2	day2	1
BM2_654	0	1	1	1	35	179	Riprolls.bmp	Fritos.bmp	22	21	0	i	3	1	0.605387	19	21	0.846667	0.793333	2	day2	1
BM2_654	0	1	1	1	36	182	100grand_small.bmp	Cheezits.bmp	14	13	0	u	2	0	0.677122	15	14	0.893333	0.906667	2	day2	1
BM2_654	0	1	1	2	37	185	Snickers.bmp	Fritos.bmp	22	21	0	i	3	1	0.516167	20	21	0.833333	0.793333	2	day2	1
BM2_654	0	1	1	2	38	188	Oreos.bmp	MilkyWay.bmp	12	11	0	u	1	0	0.75589	6	7	1.493333	1.38	2	day2	1
BM2_654	0	1	1	2	39	191	ChipsAhoy_small.bmp	SourSkittles.bmp	12	11	0	i	1	1	0.634933	8	3	1.366667	1.74	2	day2	1
BM2_654	0	1	1	2	40	195	Ghiradelli_milk_Almonds.bmp	Hersheykisses.bmp	24	23	0	i	4	1	1.207685	29	28	0.54	0.553333	2	day2	1
BM2_654	0	1	1	2	41	200	SourSkittles.bmp	Oreos.bmp	11	12	1	u	1	1	0.817423	3	6	1.74	1.493333	2	day2	1
BM2_654	0	1	1	2	42	204	Snickers.bmp	HoHo.bmp	22	21	0	i	3	1	1.310189	20	23	0.833333	0.746667	2	day2	1
BM2_654	0	1	1	2	43	208	Hersheymilk_several.bmp	Snickers.bmp	21	22	1	i	3	0	1.178231	17	20	0.88	0.833333	2	day2	1
BM2_654	0	1	1	2	44	212	Skittles.bmp	Twix.bmp	14	13	0	i	2	1	0.830966	13	16	1.026667	0.893333	2	day2	1
BM2_654	0	1	1	2	45	218	HoHo.bmp	Riprolls.bmp	21	22	1	u	3	1	0.781764	23	19	0.746667	0.846667	2	day2	1
BM2_654	0	1	1	2	46	224	PopTartsStrawberry.bmp	Sourpatch.bmp	23	24	1	i	4	0	0.724499	24	26	0.746667	0.72	2	day2	1
BM2_654	0	1	1	2	47	229	Skittles.bmp	Cheezits.bmp	14	13	0	u	2	0	0.598262	13	14	1.026667	0.906667	2	day2	1
BM2_654	0	1	1	2	48	236	Cheezits.bmp	100grand_small.bmp	13	14	1	i	2	0	0.570049	14	15	0.906667	0.893333	2	day2	1
BM2_654	0	1	1	2	49	240	PopTartsCinnamon.bmp	Jollyrancherred.bmp	14	13	0	i	2	1	0.71082	12	10	1.026667	1.226667	2	day2	1
BM2_654	0	1	1	2	50	250	MilkyWay.bmp	FamousAmos_small.bmp	11	12	1	i	1	0	0.594199	7	5	1.38	1.52	2	day2	1
BM2_654	0	1	1	2	51	260	Cheetos.bmp	FrootLoops.bmp	24	23	0	u	4	0	0.59783	27	30	0.68	0.446667	2	day2	1
BM2_654	0	1	1	2	52	264	HoHo.bmp	Chocolate_mm.bmp	21	22	1	i	3	0	0.681888	23	22	0.746667	0.773333	2	day2	1
BM2_654	0	1	1	2	53	271	Fritos.bmp	Chocolate_mm.bmp	21	22	1	u	3	1	0.694354	21	22	0.793333	0.773333	2	day2	1
BM2_654	0	1	1	2	54	275	Hersheykisses.bmp	Cheetos.bmp	23	24	1	i	4	0	0.666396	28	27	0.553333	0.68	2	day2	1
BM2_654	0	1	1	2	55	279	Cheetos.bmp	PopTartsStrawberry.bmp	24	23	0	u	4	0	0.655163	27	24	0.68	0.746667	2	day2	1
BM2_654	0	1	1	2	56	283	Milano.bmp	FamousAmos_small.bmp	11	12	1	i	1	0	0.707891	9	5	1.28	1.52	2	day2	1
BM2_654	0	1	1	2	57	286	Oreos.bmp	Milano.bmp	12	11	0	u	1	0	0.922941	6	9	1.493333	1.28	2	day2	1
BM2_654	0	1	1	2	58	289	Sourpatch.bmp	FrootLoops.bmp	24	23	0	u	4	0	0.714656	26	30	0.72	0.446667	2	day2	1
BM2_654	0	1	1	2	59	293	Jollyrancherred.bmp	100grand_small.bmp	13	14	1	i	2	0	0.607408	10	15	1.226667	0.893333	2	day2	1
BM2_654	0	1	1	2	60	296	MilkyWay.bmp	ChipsAhoy_small.bmp	11	12	1	u	1	1	1.238459	7	8	1.38	1.366667	2	day2	1
BM2_654	0	1	1	2	61	299	ChipsAhoy_small.bmp	Milano.bmp	12	11	0	i	1	1	0.998163	8	9	1.366667	1.28	2	day2	1
BM2_654	0	1	1	2	62	306	Twix.bmp	PopTartsCinnamon.bmp	13	14	1	i	2	0	0.697967	16	12	0.893333	1.026667	2	day2	1
BM2_654	0	1	1	2	63	311	SourSkittles.bmp	FamousAmos_small.bmp	11	12	1	u	1	1	0.659698	3	5	1.74	1.52	2	day2	1
BM2_654	0	1	1	2	64	317	PopTartsStrawberry.bmp	Ghiradelli_milk_Almonds.bmp	23	24	1	i	4	0	0.914497	24	29	0.746667	0.54	2	day2	1
BM2_654	0	1	1	2	65	320	Sourpatch.bmp	Hersheykisses.bmp	24	23	0	u	4	0	0.641498	26	28	0.72	0.553333	2	day2	1
BM2_654	0	1	1	2	66	324	Riprolls.bmp	Hersheymilk_several.bmp	22	21	0	i	3	1	0.838276	19	17	0.846667	0.88	2	day2	1
BM2_654	0	1	1	2	67	327	FrootLoops.bmp	Ghiradelli_milk_Almonds.bmp	23	24	1	i	4	0	0.677994	30	29	0.446667	0.54	2	day2	1
BM2_654	0	1	1	2	68	330	Riprolls.bmp	Fritos.bmp	22	21	0	i	3	1	0.54903	19	21	0.846667	0.793333	2	day2	1
BM2_654	0	1	1	2	69	333	Cheezits.bmp	PopTartsCinnamon.bmp	13	14	1	i	2	0	0.708749	14	12	0.906667	1.026667	2	day2	1
BM2_654	0	1	1	2	70	341	Hersheymilk_several.bmp	Chocolate_mm.bmp	21	22	1	i	3	0	0.781541	17	22	0.88	0.773333	2	day2	1
BM2_654	0	1	1	2	71	344	100grand_small.bmp	Twix.bmp	14	13	0	u	2	0	1.16526	15	16	0.893333	0.893333	2	day2	1
BM2_654	0	1	1	2	72	352	Skittles.bmp	Jollyrancherred.bmp	14	13	0	i	2	1	0.854079	13	10	1.026667	1.226667	2	day2	1
BM2_655	0	2	1	1	1	0	Fritos.bmp	AnimalCrackers.bmp	11	12	1	u	1	1	1.075939	23	20	0.993333	1.02	2	day2	1
BM2_655	0	2	1	1	2	10	Ghiradelli_milk_Almonds.bmp	Cheetos.bmp	21	22	1	i	3	0	0.775339	3	8	1.733333	1.48	2	day2	1
BM2_655	0	2	1	1	3	13	Toberlorone.bmp	Hersheykisses.bmp	12	11	0	i	1	1	1.207206	19	17	1.026667	1.026667	2	day2	1
BM2_655	0	2	1	1	4	16	Doritosranch.bmp	Funyuns_small.bmp	24	23	0	i	4	1	0.918938	15	10	1.226667	1.433333	2	day2	1
BM2_655	0	2	1	1	5	20	CheesyDoritos.bmp	Skittles.bmp	21	22	1	u	3	1	0.627681	9	6	1.46	1.526667	2	day2	1
BM2_655	0	2	1	1	6	24	Almondjoy.bmp	Hersheymilk_several.bmp	13	14	1	i	2	0	1.175724	28	27	0.733333	0.74	2	day2	1
BM2_655	0	2	1	1	7	28	Cheetos.bmp	Goldfish.bmp	22	21	0	u	3	0	0.916473	8	7	1.48	1.506667	2	day2	1
BM2_655	0	2	1	1	8	32	Toberlorone.bmp	Fritos.bmp	12	11	0	i	1	1	0.969219	19	23	1.026667	0.993333	2	day2	1
BM2_655	0	2	1	1	9	38	Almondjoy.bmp	PringlesRed.bmp	13	14	1	i	2	0	0.847384	28	26	0.733333	0.773333	2	day2	1
BM2_655	0	2	1	1	10	42	Hersheykisses.bmp	AnimalCrackers.bmp	11	12	1	u	1	1	0.860739	17	20	1.026667	1.02	2	day2	1
BM2_655	0	2	1	1	11	45	FrootLoops.bmp	Toberlorone.bmp	11	12	1	i	1	0	0.827787	21	19	1.013333	1.026667	2	day2	1
BM2_655	0	2	1	1	12	48	PringlesRed.bmp	SourSkittles.bmp	14	13	0	u	2	0	1.123503	26	30	0.773333	0.653333	2	day2	1
BM2_655	0	2	1	1	13	52	Skittles.bmp	Goldfish.bmp	22	21	0	i	3	1	1.191561	6	7	1.526667	1.506667	2	day2	1
BM2_655	0	2	1	1	14	61	Ghiradelli_milk_Almonds.bmp	Skittles.bmp	21	22	1	u	3	1	0.918066	3	6	1.733333	1.526667	2	day2	1
BM2_655	0	2	1	1	15	68	Cheezits.bmp	PeanutMMs.bmp	24	23	0	i	4	1	0.913819	13	16	1.293333	1.06	2	day2	1
BM2_655	0	2	1	1	16	73	Hersheymilk_several.bmp	FamousAmos_small.bmp	14	13	0	u	2	0	0.763605	27	24	0.74	0.98	2	day2	1
BM2_655	0	2	1	1	17	77	Ghiradelli_milk.bmp	Goldfish.bmp	22	21	0	u	3	0	0.911437	5	7	1.54	1.506667	2	day2	1
BM2_655	0	2	1	1	18	80	PringlesRed.bmp	FamousAmos_small.bmp	14	13	0	u	2	0	0.655363	26	24	0.773333	0.98	2	day2	1
BM2_655	0	2	1	1	19	84	Jollyrancherred.bmp	FamousAmos_small.bmp	14	13	0	i	2	1	1.020117	29	24	0.66	0.98	2	day2	1
BM2_655	0	2	1	1	20	93	Granolabar.bmp	Doritosranch.bmp	23	24	1	i	4	0	0.74662	14	15	1.253333	1.226667	2	day2	1
BM2_655	0	2	1	1	21	98	Chocolate_mm.bmp	Fritos.bmp	12	11	0	i	1	1	0.660369	22	23	1.006667	0.993333	2	day2	1
BM2_655	0	2	1	1	22	101	Laysclassic.bmp	PeanutMMs.bmp	24	23	0	u	4	0	0.755428	12	16	1.32	1.06	2	day2	1
BM2_655	0	2	1	1	23	104	Ghiradelli_milk.bmp	Ghiradelli_milk_Almonds.bmp	22	21	0	i	3	1	1.299166	5	3	1.54	1.733333	2	day2	1
BM2_655	0	2	1	1	24	108	Funyuns_small.bmp	Cheezits.bmp	23	24	1	u	4	1	0.759181	10	13	1.433333	1.293333	2	day2	1
BM2_655	0	2	1	1	25	111	Hersheykisses.bmp	Chocolate_mm.bmp	11	12	1	i	1	0	1.34281	17	22	1.026667	1.006667	2	day2	1
BM2_655	0	2	1	1	26	114	Almondjoy.bmp	Jollyrancherred.bmp	13	14	1	i	2	0	1.190666	28	29	0.733333	0.66	2	day2	1
BM2_655	0	2	1	1	27	123	Chocolate_mm.bmp	FrootLoops.bmp	12	11	0	u	1	0	0.644463	22	21	1.006667	1.013333	2	day2	1
BM2_655	0	2	1	1	28	126	FrootLoops.bmp	AnimalCrackers.bmp	11	12	1	i	1	0	0.732201	21	20	1.013333	1.02	2	day2	1
BM2_655	0	2	1	1	29	130	CheesyDoritos.bmp	Cheetos.bmp	21	22	1	u	3	1	0.776238	9	8	1.46	1.48	2	day2	1
BM2_655	0	2	1	1	30	135	Laysclassic.bmp	Funyuns_small.bmp	24	23	0	i	4	1	0.673986	12	10	1.32	1.433333	2	day2	1
BM2_655	0	2	1	1	31	148	SourSkittles.bmp	Jollyrancherred.bmp	13	14	1	u	2	1	1.117248	30	29	0.653333	0.66	2	day2	1
BM2_655	0	2	1	1	32	151	Laysclassic.bmp	Granolabar.bmp	24	23	0	u	4	0	0.788309	12	14	1.32	1.253333	2	day2	1
BM2_655	0	2	1	1	33	154	Cheezits.bmp	Granolabar.bmp	24	23	0	i	4	1	1.156011	13	14	1.293333	1.253333	2	day2	1
BM2_655	0	2	1	1	34	160	PeanutMMs.bmp	Doritosranch.bmp	23	24	1	i	4	0	0.754787	16	15	1.06	1.226667	2	day2	1
BM2_655	0	2	1	1	35	164	CheesyDoritos.bmp	Ghiradelli_milk.bmp	21	22	1	u	3	1	1.311513	9	5	1.46	1.54	2	day2	1
BM2_655	0	2	1	1	36	168	SourSkittles.bmp	Hersheymilk_several.bmp	13	14	1	i	2	0	0.715585	30	27	0.653333	0.74	2	day2	1
BM2_655	0	2	1	2	37	171	FrootLoops.bmp	Toberlorone.bmp	11	12	1	i	1	0	0.731306	21	19	1.013333	1.026667	2	day2	1
BM2_655	0	2	1	2	38	177	Cheezits.bmp	Funyuns_small.bmp	24	23	0	i	4	1	0.56208	13	10	1.293333	1.433333	2	day2	1
BM2_655	0	2	1	2	39	181	Cheezits.bmp	Granolabar.bmp	24	23	0	i	4	1	0.942852	13	14	1.293333	1.253333	2	day2	1
BM2_655	0	2	1	2	40	187	Granolabar.bmp	Laysclassic.bmp	23	24	1	i	4	0	0.6216	14	12	1.253333	1.32	2	day2	1
BM2_655	0	2	1	2	41	192	FrootLoops.bmp	AnimalCrackers.bmp	11	12	1	i	1	0	0.766642	21	20	1.013333	1.02	2	day2	1
BM2_655	0	2	1	2	42	202	Almondjoy.bmp	Jollyrancherred.bmp	13	14	1	i	2	0	1.162163	28	29	0.733333	0.66	2	day2	1
BM2_655	0	2	1	2	43	212	Ghiradelli_milk.bmp	Ghiradelli_milk_Almonds.bmp	22	21	0	i	3	1	0.949668	5	3	1.54	1.733333	2	day2	1
BM2_655	0	2	1	2	44	220	FamousAmos_small.bmp	Jollyrancherred.bmp	13	14	1	u	2	1	0.879154	24	29	0.98	0.66	2	day2	1
BM2_655	0	2	1	2	45	224	Skittles.bmp	Ghiradelli_milk_Almonds.bmp	22	21	0	i	3	1	0.635244	6	3	1.526667	1.733333	2	day2	1
BM2_655	0	2	1	2	46	227	Toberlorone.bmp	Hersheykisses.bmp	12	11	0	i	1	1	1.018948	19	17	1.026667	1.026667	2	day2	1
BM2_655	0	2	1	2	47	230	Ghiradelli_milk.bmp	CheesyDoritos.bmp	22	21	0	i	3	1	1.041988	5	9	1.54	1.46	2	day2	1
BM2_655	0	2	1	2	48	233	PeanutMMs.bmp	Doritosranch.bmp	23	24	1	u	4	1	0.713709	16	15	1.06	1.226667	2	day2	1
BM2_655	0	2	1	2	49	241	Toberlorone.bmp	Fritos.bmp	12	11	0	i	1	1	0.850506	19	23	1.026667	0.993333	2	day2	1
BM2_655	0	2	1	2	50	244	Granolabar.bmp	Doritosranch.bmp	23	24	1	i	4	0	0.858228	14	15	1.253333	1.226667	2	day2	1
BM2_655	0	2	1	2	51	252	Fritos.bmp	Chocolate_mm.bmp	11	12	1	u	1	1	0.843031	23	22	0.993333	1.006667	2	day2	1
BM2_655	0	2	1	2	52	259	PringlesRed.bmp	SourSkittles.bmp	14	13	0	u	2	0	0.703492	26	30	0.773333	0.653333	2	day2	1
BM2_655	0	2	1	2	53	262	Hersheykisses.bmp	Chocolate_mm.bmp	11	12	1	i	1	0	0.806495	17	22	1.026667	1.006667	2	day2	1
BM2_655	0	2	1	2	54	269	Laysclassic.bmp	PeanutMMs.bmp	24	23	0	u	4	0	0.786325	12	16	1.32	1.06	2	day2	1
BM2_655	0	2	1	2	55	273	Skittles.bmp	Goldfish.bmp	22	21	0	u	3	0	0.759099	6	7	1.526667	1.506667	2	day2	1
BM2_655	0	2	1	2	56	282	Hersheymilk_several.bmp	SourSkittles.bmp	14	13	0	u	2	0	1.213566	27	30	0.74	0.653333	2	day2	1
BM2_655	0	2	1	2	57	286	CheesyDoritos.bmp	Cheetos.bmp	21	22	1	i	3	0	1.209602	9	8	1.46	1.48	2	day2	1
BM2_655	0	2	1	2	58	300	Cheetos.bmp	Goldfish.bmp	22	21	0	u	3	0	0.865873	8	7	1.48	1.506667	2	day2	1
BM2_655	0	2	1	2	59	303	Ghiradelli_milk.bmp	Goldfish.bmp	22	21	0	u	3	0	0.928899	5	7	1.54	1.506667	2	day2	1
BM2_655	0	2	1	2	60	306	PringlesRed.bmp	FamousAmos_small.bmp	14	13	0	u	2	0	0.751397	26	24	0.773333	0.98	2	day2	1
BM2_655	0	2	1	2	61	309	Funyuns_small.bmp	Doritosranch.bmp	23	24	1	u	4	1	0.9997	10	15	1.433333	1.226667	2	day2	1
BM2_655	0	2	1	2	62	312	PringlesRed.bmp	Almondjoy.bmp	14	13	0	u	2	0	0.61544	26	28	0.773333	0.733333	2	day2	1
BM2_655	0	2	1	2	63	315	Fritos.bmp	AnimalCrackers.bmp	11	12	1	u	1	1	0.62312	23	20	0.993333	1.02	2	day2	1
BM2_655	0	2	1	2	64	318	AnimalCrackers.bmp	Hersheykisses.bmp	12	11	0	x	1	NA	NA	20	17	1.02	1.026667	2	day2	1
BM2_655	0	2	1	2	65	324	Hersheymilk_several.bmp	Almondjoy.bmp	14	13	0	u	2	0	0.628966	27	28	0.74	0.733333	2	day2	1
BM2_655	0	2	1	2	66	328	SourSkittles.bmp	Jollyrancherred.bmp	13	14	1	i	2	0	0.881685	30	29	0.653333	0.66	2	day2	1
BM2_655	0	2	1	2	67	333	Laysclassic.bmp	Funyuns_small.bmp	24	23	0	i	4	1	0.57946	12	10	1.32	1.433333	2	day2	1
BM2_655	0	2	1	2	68	339	Ghiradelli_milk_Almonds.bmp	Cheetos.bmp	21	22	1	u	3	1	0.770245	3	8	1.733333	1.48	2	day2	1
BM2_655	0	2	1	2	69	342	CheesyDoritos.bmp	Skittles.bmp	21	22	1	u	3	1	0.553248	9	6	1.46	1.526667	2	day2	1
BM2_655	0	2	1	2	70	345	FrootLoops.bmp	Chocolate_mm.bmp	11	12	1	i	1	0	0.504987	21	22	1.013333	1.006667	2	day2	1
BM2_655	0	2	1	2	71	349	PeanutMMs.bmp	Cheezits.bmp	23	24	1	u	4	1	0.541699	16	13	1.06	1.293333	2	day2	1
BM2_655	0	2	1	2	72	352	FamousAmos_small.bmp	Hersheymilk_several.bmp	13	14	1	i	2	0	0.964772	24	27	0.98	0.74	2	day2	1
BM2_656	0	1	2	1	1	0	Milkduds.bmp	PopTartsCinnamon.bmp	24	23	0	i	4	1	0.689022	30	29	1.766667	1.946667	2	day2	1
BM2_656	0	1	2	1	2	9	3Musketeers.bmp	Hersheykisses.bmp	23	24	1	u	4	1	0.712211	26	28	2	1.986667	2	day2	1
BM2_656	0	1	2	1	3	12	Riprolls.bmp	Laysclassic.bmp	14	13	0	i	2	1	0.711244	10	15	2.686667	2.526667	2	day2	1
BM2_656	0	1	2	1	4	17	PringlesRed.bmp	Doritosranch.bmp	12	11	0	i	1	1	1.19301	7	8	2.726667	2.7	2	day2	1
BM2_656	0	1	2	1	5	26	CheesyDoritos.bmp	Riprolls.bmp	13	14	1	u	2	1	0.863503	12	10	2.646667	2.686667	2	day2	1
BM2_656	0	1	2	1	6	32	Ghiradelli_milk_Almonds.bmp	Ghiradelli_milk.bmp	12	11	0	i	1	1	1.190282	9	5	2.686667	2.926667	2	day2	1
BM2_656	0	1	2	1	7	35	SourSkittles.bmp	MilkyWay.bmp	13	14	1	i	2	0	0.909337	13	14	2.58	2.566667	2	day2	1
BM2_656	0	1	2	1	8	48	MilkyWay.bmp	CheesyDoritos.bmp	14	13	0	i	2	1	1.224564	14	12	2.566667	2.646667	2	day2	1
BM2_656	0	1	2	1	9	58	Twix.bmp	Ghiradelli_milk_Almonds.bmp	11	12	1	i	1	0	1.460084	6	9	2.76	2.686667	2	day2	1
BM2_656	0	1	2	1	10	63	Ghiradelli_milk_Almonds.bmp	Doritosranch.bmp	12	11	0	u	1	0	1.293157	9	8	2.686667	2.7	2	day2	1
BM2_656	0	1	2	1	11	66	Hersheykisses.bmp	PopTartsCinnamon.bmp	24	23	0	i	4	1	0.811862	28	29	1.986667	1.946667	2	day2	1
BM2_656	0	1	2	1	12	69	Milkduds.bmp	3Musketeers.bmp	24	23	0	i	4	1	1.020532	30	26	1.766667	2	2	day2	1
BM2_656	0	1	2	1	13	72	FamousAmos_small.bmp	Hersheymilk_several.bmp	21	22	1	u	3	1	1.043633	22	21	2.253333	2.273333	2	day2	1
BM2_656	0	1	2	1	14	82	Cheezits.bmp	Goldfish.bmp	21	22	1	u	3	1	0.81514	19	17	2.326667	2.52	2	day2	1
BM2_656	0	1	2	1	15	85	Cheezits.bmp	Hersheymilk_several.bmp	21	22	1	u	3	1	1.014171	19	21	2.326667	2.273333	2	day2	1
BM2_656	0	1	2	1	16	95	PopTartsCinnamon.bmp	KitKat_small.bmp	23	24	1	u	4	1	1.329702	29	24	1.946667	2.22	2	day2	1
BM2_656	0	1	2	1	17	98	KitKat_small.bmp	3Musketeers.bmp	24	23	0	i	4	1	1.04943	24	26	2.22	2	2	day2	1
BM2_656	0	1	2	1	18	101	SourSkittles.bmp	Riprolls.bmp	13	14	1	i	2	0	1.032461	13	10	2.58	2.686667	2	day2	1
BM2_656	0	1	2	1	19	105	Chocolate_mm.bmp	CheesyDoritos.bmp	14	13	0	i	2	1	0.813191	16	12	2.52	2.646667	2	day2	1
BM2_656	0	1	2	1	20	109	Butterfinger.bmp	KitKat_small.bmp	23	24	1	u	4	1	1.265952	27	24	1.993333	2.22	2	day2	1
BM2_656	0	1	2	1	21	113	Hersheykisses.bmp	Butterfinger.bmp	24	23	0	i	4	1	0.749995	28	27	1.986667	1.993333	2	day2	1
BM2_656	0	1	2	1	22	119	Chocolate_mm.bmp	SourSkittles.bmp	14	13	0	u	2	0	1.34879	16	13	2.52	2.58	2	day2	1
BM2_656	0	1	2	1	23	123	ChipsAhoy_small.bmp	Hersheymilk_several.bmp	21	22	1	u	3	1	0.833541	20	21	2.28	2.273333	2	day2	1
BM2_656	0	1	2	1	24	132	Twix.bmp	Toberlorone.bmp	11	12	1	i	1	0	0.864012	6	3	2.76	2.966667	2	day2	1
BM2_656	0	1	2	1	25	140	MilkyWay.bmp	Laysclassic.bmp	14	13	0	i	2	1	1.064803	14	15	2.566667	2.526667	2	day2	1
BM2_656	0	1	2	1	26	144	Chocolate_mm.bmp	Laysclassic.bmp	14	13	0	i	2	1	0.829553	16	15	2.52	2.526667	2	day2	1
BM2_656	0	1	2	1	27	147	Ghiradelli_milk.bmp	Toberlorone.bmp	11	12	1	i	1	0	1.228577	5	3	2.926667	2.966667	2	day2	1
BM2_656	0	1	2	1	28	151	Butterfinger.bmp	Milkduds.bmp	23	24	1	u	4	1	0.84935	27	30	1.993333	1.766667	2	day2	1
BM2_656	0	1	2	1	29	154	FrootLoops.bmp	ChipsAhoy_small.bmp	22	21	0	i	3	1	0.769069	23	20	2.253333	2.28	2	day2	1
BM2_656	0	1	2	1	30	158	Twix.bmp	PringlesRed.bmp	11	12	1	i	1	0	0.901103	6	7	2.76	2.726667	2	day2	1
BM2_656	0	1	2	1	31	161	FamousAmos_small.bmp	FrootLoops.bmp	21	22	1	u	3	1	0.692288	22	23	2.253333	2.253333	2	day2	1
BM2_656	0	1	2	1	32	167	Toberlorone.bmp	Doritosranch.bmp	12	11	0	u	1	0	1.123621	3	8	2.966667	2.7	2	day2	1
BM2_656	0	1	2	1	33	170	ChipsAhoy_small.bmp	Goldfish.bmp	21	22	1	u	3	1	0.73134	20	17	2.28	2.52	2	day2	1
BM2_656	0	1	2	1	34	174	Goldfish.bmp	FamousAmos_small.bmp	22	21	0	i	3	1	0.743383	17	22	2.52	2.253333	2	day2	1
BM2_656	0	1	2	1	35	179	FrootLoops.bmp	Cheezits.bmp	22	21	0	i	3	1	0.657144	23	19	2.253333	2.326667	2	day2	1
BM2_656	0	1	2	1	36	182	Ghiradelli_milk.bmp	PringlesRed.bmp	11	12	1	u	1	1	1.224879	5	7	2.926667	2.726667	2	day2	1
BM2_656	0	1	2	2	37	185	KitKat_small.bmp	PopTartsCinnamon.bmp	24	23	0	i	4	1	1.007916	24	29	2.22	1.946667	2	day2	1
BM2_656	0	1	2	2	38	188	Ghiradelli_milk_Almonds.bmp	Twix.bmp	12	11	0	i	1	1	1.407647	9	6	2.686667	2.76	2	day2	1
BM2_656	0	1	2	2	39	191	ChipsAhoy_small.bmp	FrootLoops.bmp	21	22	1	u	3	1	0.654669	20	23	2.28	2.253333	2	day2	1
BM2_656	0	1	2	2	40	195	FrootLoops.bmp	FamousAmos_small.bmp	22	21	0	i	3	1	0.715424	23	22	2.253333	2.253333	2	day2	1
BM2_656	0	1	2	2	41	200	Doritosranch.bmp	PringlesRed.bmp	11	12	1	x	1	NA	NA	8	7	2.7	2.726667	2	day2	1
BM2_656	0	1	2	2	42	204	Hersheykisses.bmp	PopTartsCinnamon.bmp	24	23	0	i	4	1	0.62592	28	29	1.986667	1.946667	2	day2	1
BM2_656	0	1	2	2	43	208	FamousAmos_small.bmp	Goldfish.bmp	21	22	1	u	3	1	0.605997	22	17	2.253333	2.52	2	day2	1
BM2_656	0	1	2	2	44	212	Doritosranch.bmp	Ghiradelli_milk_Almonds.bmp	11	12	1	i	1	0	1.01072	8	9	2.7	2.686667	2	day2	1
BM2_656	0	1	2	2	45	218	MilkyWay.bmp	Laysclassic.bmp	14	13	0	i	2	1	0.793482	14	15	2.566667	2.526667	2	day2	1
BM2_656	0	1	2	2	46	224	PringlesRed.bmp	Twix.bmp	12	11	0	u	1	0	0.800251	7	6	2.726667	2.76	2	day2	1
BM2_656	0	1	2	2	47	229	Doritosranch.bmp	Toberlorone.bmp	11	12	1	i	1	0	0.930008	8	3	2.7	2.966667	2	day2	1
BM2_656	0	1	2	2	48	236	Ghiradelli_milk_Almonds.bmp	Ghiradelli_milk.bmp	12	11	0	i	1	1	0.949812	9	5	2.686667	2.926667	2	day2	1
BM2_656	0	1	2	2	49	240	3Musketeers.bmp	Hersheykisses.bmp	23	24	1	u	4	1	0.714561	26	28	2	1.986667	2	day2	1
BM2_656	0	1	2	2	50	250	CheesyDoritos.bmp	MilkyWay.bmp	13	14	1	u	2	1	1.062038	12	14	2.646667	2.566667	2	day2	1
BM2_656	0	1	2	2	51	260	CheesyDoritos.bmp	Chocolate_mm.bmp	13	14	1	u	2	1	0.697588	12	16	2.646667	2.52	2	day2	1
BM2_656	0	1	2	2	52	264	Riprolls.bmp	SourSkittles.bmp	14	13	0	u	2	0	0.885627	10	13	2.686667	2.58	2	day2	1
BM2_656	0	1	2	2	53	271	Laysclassic.bmp	Chocolate_mm.bmp	13	14	1	u	2	1	0.650087	15	16	2.526667	2.52	2	day2	1
BM2_656	0	1	2	2	54	275	Cheezits.bmp	Hersheymilk_several.bmp	21	22	1	u	3	1	0.76617	19	21	2.326667	2.273333	2	day2	1
BM2_656	0	1	2	2	55	279	3Musketeers.bmp	KitKat_small.bmp	23	24	1	u	4	1	0.8669	26	24	2	2.22	2	day2	1
BM2_656	0	1	2	2	56	283	Riprolls.bmp	Laysclassic.bmp	14	13	0	i	2	1	1.095617	10	15	2.686667	2.526667	2	day2	1
BM2_656	0	1	2	2	57	286	CheesyDoritos.bmp	Riprolls.bmp	13	14	1	u	2	1	0.838639	12	10	2.646667	2.686667	2	day2	1
BM2_656	0	1	2	2	58	289	Butterfinger.bmp	KitKat_small.bmp	23	24	1	u	4	1	0.878378	27	24	1.993333	2.22	2	day2	1
BM2_656	0	1	2	2	59	293	FrootLoops.bmp	Cheezits.bmp	22	21	0	i	3	1	0.643141	23	19	2.253333	2.326667	2	day2	1
BM2_656	0	1	2	2	60	296	Goldfish.bmp	ChipsAhoy_small.bmp	22	21	0	i	3	1	0.72216	17	20	2.52	2.28	2	day2	1
BM2_656	0	1	2	2	61	299	Toberlorone.bmp	Twix.bmp	12	11	0	u	1	0	0.6979	3	6	2.966667	2.76	2	day2	1
BM2_656	0	1	2	2	62	306	Cheezits.bmp	Goldfish.bmp	21	22	1	u	3	1	0.636484	19	17	2.326667	2.52	2	day2	1
BM2_656	0	1	2	2	63	311	Milkduds.bmp	PopTartsCinnamon.bmp	24	23	0	i	4	1	0.679438	30	29	1.766667	1.946667	2	day2	1
BM2_656	0	1	2	2	64	317	SourSkittles.bmp	Chocolate_mm.bmp	13	14	1	i	2	0	1.118206	13	16	2.58	2.52	2	day2	1
BM2_656	0	1	2	2	65	320	MilkyWay.bmp	SourSkittles.bmp	14	13	0	u	2	0	1.021251	14	13	2.566667	2.58	2	day2	1
BM2_656	0	1	2	2	66	324	Hersheymilk_several.bmp	FamousAmos_small.bmp	22	21	0	i	3	1	0.657978	21	22	2.273333	2.253333	2	day2	1
BM2_656	0	1	2	2	67	327	Milkduds.bmp	Butterfinger.bmp	24	23	0	i	4	1	0.665719	30	27	1.766667	1.993333	2	day2	1
BM2_656	0	1	2	2	68	330	Toberlorone.bmp	Ghiradelli_milk.bmp	12	11	0	u	1	0	0.928742	3	5	2.966667	2.926667	2	day2	1
BM2_656	0	1	2	2	69	333	Butterfinger.bmp	Hersheykisses.bmp	23	24	1	u	4	1	0.656479	27	28	1.993333	1.986667	2	day2	1
BM2_656	0	1	2	2	70	341	Ghiradelli_milk.bmp	PringlesRed.bmp	11	12	1	i	1	0	1.289265	5	7	2.926667	2.726667	2	day2	1
BM2_656	0	1	2	2	71	344	3Musketeers.bmp	Milkduds.bmp	23	24	1	u	4	1	0.632999	26	30	2	1.766667	2	day2	1
BM2_656	0	1	2	2	72	352	Hersheymilk_several.bmp	ChipsAhoy_small.bmp	22	21	0	i	3	1	0.689803	21	20	2.273333	2.28	2	day2	1
BM2_657	0	2	2	1	1	0	PringlesRed.bmp	Hersheykisses.bmp	14	13	0	u	2	0	0.821816	28	27	1.493333	1.5	2	day2	1
BM2_657	0	2	2	1	2	9	Goldfish.bmp	HoHo.bmp	14	13	0	i	2	1	0.885009	30	29	1.453333	1.48	2	day2	1
BM2_657	0	2	2	1	3	12	Twinkie.bmp	Skittles.bmp	24	23	0	i	4	1	0.732071	10	13	2.18	2.02	2	day2	1
BM2_657	0	2	2	1	4	17	MilkyWay.bmp	Chocolate_mm.bmp	12	11	0	i	1	1	0.917803	21	22	1.746667	1.74	2	day2	1
BM2_657	0	2	2	1	5	26	FlamingCheetos.bmp	Chocolate_mm.bmp	12	11	0	i	1	1	1.156318	17	22	1.94	1.74	2	day2	1
BM2_657	0	2	2	1	6	32	CheesyDoritos.bmp	PeanutMMs.bmp	21	22	1	u	3	1	0.563044	5	7	2.46	2.366667	2	day2	1
BM2_657	0	2	2	1	7	35	Snickers.bmp	MilkyWay.bmp	11	12	1	u	1	1	0.794138	19	21	1.813333	1.746667	2	day2	1
BM2_657	0	2	2	1	8	48	Reeses.bmp	Doritosranch.bmp	22	21	0	i	3	1	0.709383	9	6	2.24	2.46	2	day2	1
BM2_657	0	2	2	1	9	58	SnoBall.bmp	MilkyWay.bmp	11	12	1	i	1	0	0.720908	20	21	1.766667	1.746667	2	day2	1
BM2_657	0	2	2	1	10	63	Goldfish.bmp	Hersheykisses.bmp	14	13	0	u	2	0	1.049946	30	27	1.453333	1.5	2	day2	1
BM2_657	0	2	2	1	11	66	HoHo.bmp	PringlesRed.bmp	13	14	1	i	2	0	0.720688	29	28	1.48	1.493333	2	day2	1
BM2_657	0	2	2	1	12	69	Toberlorone.bmp	Doritosranch.bmp	22	21	0	i	3	1	0.584714	3	6	2.68	2.46	2	day2	1
BM2_657	0	2	2	1	13	72	Streusel.bmp	Hersheykisses.bmp	14	13	0	i	2	1	0.824455	24	27	1.7	1.5	2	day2	1
BM2_657	0	2	2	1	14	82	PopTartsStrawberry.bmp	PeanutMMs.bmp	21	22	1	u	3	1	0.651951	8	7	2.293333	2.366667	2	day2	1
BM2_657	0	2	2	1	15	85	Sourpatch.bmp	Skittles.bmp	24	23	0	i	4	1	0.554985	16	13	1.96	2.02	2	day2	1
BM2_657	0	2	2	1	16	95	Toberlorone.bmp	PopTartsStrawberry.bmp	22	21	0	i	3	1	0.558511	3	8	2.68	2.293333	2	day2	1
BM2_657	0	2	2	1	17	98	Keeblerfudgestripes.bmp	Twinkie.bmp	23	24	1	u	4	1	0.614161	15	10	1.98	2.18	2	day2	1
BM2_657	0	2	2	1	18	101	CheesyDoritos.bmp	Reeses.bmp	21	22	1	u	3	1	0.637268	5	9	2.46	2.24	2	day2	1
BM2_657	0	2	2	1	19	105	FlamingCheetos.bmp	Snickers.bmp	12	11	0	u	1	0	0.61686	17	19	1.94	1.813333	2	day2	1
BM2_657	0	2	2	1	20	109	Skittles.bmp	KitKat_small.bmp	23	24	1	u	4	1	0.566773	13	14	2.02	1.993333	2	day2	1
BM2_657	0	2	2	1	21	113	FamousAmos_small.bmp	Chocolate_mm.bmp	12	11	0	i	1	1	0.506789	23	22	1.726667	1.74	2	day2	1
BM2_657	0	2	2	1	22	119	PringlesRed.bmp	Granolabar.bmp	14	13	0	i	2	1	0.617592	28	26	1.493333	1.54	2	day2	1
BM2_657	0	2	2	1	23	123	Snickers.bmp	FamousAmos_small.bmp	11	12	1	u	1	1	0.454339	19	23	1.813333	1.726667	2	day2	1
BM2_657	0	2	2	1	24	132	Granolabar.bmp	Goldfish.bmp	13	14	1	i	2	0	0.780842	26	30	1.54	1.453333	2	day2	1
BM2_657	0	2	2	1	25	140	PopTartsStrawberry.bmp	Reeses.bmp	21	22	1	u	3	1	0.565636	8	9	2.293333	2.24	2	day2	1
BM2_657	0	2	2	1	26	144	KitKat_small.bmp	Keeblerfudgestripes.bmp	24	23	0	i	4	1	0.730385	14	15	1.993333	1.98	2	day2	1
BM2_657	0	2	2	1	27	147	Ghiradelli_milk.bmp	Twinkie.bmp	23	24	1	u	4	1	0.721398	12	10	2.073333	2.18	2	day2	1
BM2_657	0	2	2	1	28	151	Toberlorone.bmp	CheesyDoritos.bmp	22	21	0	i	3	1	0.566164	3	5	2.68	2.46	2	day2	1
BM2_657	0	2	2	1	29	154	Granolabar.bmp	Streusel.bmp	13	14	1	u	2	1	0.669903	26	24	1.54	1.7	2	day2	1
BM2_657	0	2	2	1	30	158	Sourpatch.bmp	Keeblerfudgestripes.bmp	24	23	0	i	4	1	0.569939	16	15	1.96	1.98	2	day2	1
BM2_657	0	2	2	1	31	161	Ghiradelli_milk.bmp	Sourpatch.bmp	23	24	1	u	4	1	0.624428	12	16	2.073333	1.96	2	day2	1
BM2_657	0	2	2	1	32	167	Doritosranch.bmp	PeanutMMs.bmp	21	22	1	u	3	1	0.608435	6	7	2.46	2.366667	2	day2	1
BM2_657	0	2	2	1	33	170	SnoBall.bmp	FlamingCheetos.bmp	11	12	1	i	1	0	0.656191	20	17	1.766667	1.94	2	day2	1
BM2_657	0	2	2	1	34	174	Ghiradelli_milk.bmp	KitKat_small.bmp	23	24	1	i	4	0	0.644226	12	14	2.073333	1.993333	2	day2	1
BM2_657	0	2	2	1	35	179	FamousAmos_small.bmp	SnoBall.bmp	12	11	0	u	1	0	0.645926	23	20	1.726667	1.766667	2	day2	1
BM2_657	0	2	2	1	36	182	HoHo.bmp	Streusel.bmp	13	14	1	u	2	1	0.605715	29	24	1.48	1.7	2	day2	1
BM2_657	0	2	2	2	37	185	KitKat_small.bmp	Keeblerfudgestripes.bmp	24	23	0	i	4	1	0.532758	14	15	1.993333	1.98	2	day2	1
BM2_657	0	2	2	2	38	188	Snickers.bmp	MilkyWay.bmp	11	12	1	u	1	1	0.740402	19	21	1.813333	1.746667	2	day2	1
BM2_657	0	2	2	2	39	191	Twinkie.bmp	Keeblerfudgestripes.bmp	24	23	0	i	4	1	0.467455	10	15	2.18	1.98	2	day2	1
BM2_657	0	2	2	2	40	195	FlamingCheetos.bmp	Chocolate_mm.bmp	12	11	0	i	1	1	0.776275	17	22	1.94	1.74	2	day2	1
BM2_657	0	2	2	2	41	200	Granolabar.bmp	Streusel.bmp	13	14	1	u	2	1	0.489389	26	24	1.54	1.7	2	day2	1
BM2_657	0	2	2	2	42	204	PringlesRed.bmp	Granolabar.bmp	14	13	0	i	2	1	0.510779	28	26	1.493333	1.54	2	day2	1
BM2_657	0	2	2	2	43	208	Sourpatch.bmp	Skittles.bmp	24	23	0	i	4	1	0.554845	16	13	1.96	2.02	2	day2	1
BM2_657	0	2	2	2	44	212	KitKat_small.bmp	Skittles.bmp	24	23	0	i	4	1	0.543571	14	13	1.993333	2.02	2	day2	1
BM2_657	0	2	2	2	45	218	SnoBall.bmp	MilkyWay.bmp	11	12	1	i	1	0	0.646337	20	21	1.766667	1.746667	2	day2	1
BM2_657	0	2	2	2	46	224	FamousAmos_small.bmp	Chocolate_mm.bmp	12	11	0	i	1	1	0.62902	23	22	1.726667	1.74	2	day2	1
BM2_657	0	2	2	2	47	229	FlamingCheetos.bmp	SnoBall.bmp	12	11	0	u	1	0	0.59086	17	20	1.94	1.766667	2	day2	1
BM2_657	0	2	2	2	48	236	KitKat_small.bmp	Ghiradelli_milk.bmp	24	23	0	i	4	1	0.594637	14	12	1.993333	2.073333	2	day2	1
BM2_657	0	2	2	2	49	240	Streusel.bmp	HoHo.bmp	14	13	0	i	2	1	0.591385	24	29	1.7	1.48	2	day2	1
BM2_657	0	2	2	2	50	250	SnoBall.bmp	FamousAmos_small.bmp	11	12	1	i	1	0	0.666893	20	23	1.766667	1.726667	2	day2	1
BM2_657	0	2	2	2	51	260	PopTartsStrawberry.bmp	Reeses.bmp	21	22	1	u	3	1	0.646427	8	9	2.293333	2.24	2	day2	1
BM2_657	0	2	2	2	52	264	Keeblerfudgestripes.bmp	Sourpatch.bmp	23	24	1	u	4	1	0.618458	15	16	1.98	1.96	2	day2	1
BM2_657	0	2	2	2	53	271	CheesyDoritos.bmp	Reeses.bmp	21	22	1	u	3	1	0.566938	5	9	2.46	2.24	2	day2	1
BM2_657	0	2	2	2	54	275	CheesyDoritos.bmp	PeanutMMs.bmp	21	22	1	u	3	1	0.466987	5	7	2.46	2.366667	2	day2	1
BM2_657	0	2	2	2	55	279	Toberlorone.bmp	PopTartsStrawberry.bmp	22	21	0	i	3	1	0.567743	3	8	2.68	2.293333	2	day2	1
BM2_657	0	2	2	2	56	283	Snickers.bmp	FlamingCheetos.bmp	11	12	1	u	1	1	0.780479	19	17	1.813333	1.94	2	day2	1
BM2_657	0	2	2	2	57	286	Doritosranch.bmp	Reeses.bmp	21	22	1	u	3	1	0.603509	6	9	2.46	2.24	2	day2	1
BM2_657	0	2	2	2	58	289	Goldfish.bmp	Hersheykisses.bmp	14	13	0	u	2	0	0.739247	30	27	1.453333	1.5	2	day2	1
BM2_657	0	2	2	2	59	293	Snickers.bmp	FamousAmos_small.bmp	11	12	1	u	1	1	0.783988	19	23	1.813333	1.726667	2	day2	1
BM2_657	0	2	2	2	60	296	Skittles.bmp	Twinkie.bmp	23	24	1	u	4	1	0.614997	13	10	2.02	2.18	2	day2	1
BM2_657	0	2	2	2	61	299	Doritosranch.bmp	PeanutMMs.bmp	21	22	1	u	3	1	0.590759	6	7	2.46	2.366667	2	day2	1
BM2_657	0	2	2	2	62	306	Goldfish.bmp	HoHo.bmp	14	13	0	u	2	0	0.625353	30	29	1.453333	1.48	2	day2	1
BM2_657	0	2	2	2	63	311	PringlesRed.bmp	Hersheykisses.bmp	14	13	0	u	2	0	0.548323	28	27	1.493333	1.5	2	day2	1
BM2_657	0	2	2	2	64	317	MilkyWay.bmp	Chocolate_mm.bmp	12	11	0	u	1	0	0.603091	21	22	1.746667	1.74	2	day2	1
BM2_657	0	2	2	2	65	320	PopTartsStrawberry.bmp	PeanutMMs.bmp	21	22	1	u	3	1	0.490112	8	7	2.293333	2.366667	2	day2	1
BM2_657	0	2	2	2	66	324	Doritosranch.bmp	Toberlorone.bmp	21	22	1	u	3	1	0.550842	6	3	2.46	2.68	2	day2	1
BM2_657	0	2	2	2	67	327	Goldfish.bmp	Granolabar.bmp	14	13	0	u	2	0	0.622583	30	26	1.453333	1.54	2	day2	1
BM2_657	0	2	2	2	68	330	Hersheykisses.bmp	Streusel.bmp	13	14	1	u	2	1	0.661537	27	24	1.5	1.7	2	day2	1
BM2_657	0	2	2	2	69	333	CheesyDoritos.bmp	Toberlorone.bmp	21	22	1	u	3	1	0.509343	5	3	2.46	2.68	2	day2	1
BM2_657	0	2	2	2	70	341	Twinkie.bmp	Ghiradelli_milk.bmp	24	23	0	i	4	1	0.646097	10	12	2.18	2.073333	2	day2	1
BM2_657	0	2	2	2	71	344	Ghiradelli_milk.bmp	Sourpatch.bmp	23	24	1	u	4	1	0.749828	12	16	2.073333	1.96	2	day2	1
BM2_657	0	2	2	2	72	352	PringlesRed.bmp	HoHo.bmp	14	13	0	u	2	0	0.614661	28	29	1.493333	1.48	2	day2	1
BM2_658	0	1	1	1	1	0	Fritos.bmp	Toberlorone.bmp	23	24	1	u	4	1	0.756004	24	27	0.546667	0.46	2	day2	1
BM2_658	0	1	1	1	2	10	Granolabar.bmp	Doritosranch.bmp	14	13	0	i	2	1	0.728679	12	10	0.853333	0.913333	2	day2	1
BM2_658	0	1	1	1	3	13	FamousAmos_small.bmp	Twix.bmp	12	11	0	i	1	1	1.151697	6	3	1.013333	1.033333	2	day2	1
BM2_658	0	1	1	1	4	16	PeanutMMs.bmp	PayDay.bmp	22	21	0	u	3	0	0.719123	20	23	0.786667	0.6	2	day2	1
BM2_658	0	1	1	1	5	20	Whatchamacallit.bmp	Milano.bmp	14	13	0	i	2	1	0.820124	15	14	0.82	0.826667	2	day2	1
BM2_658	0	1	1	1	6	24	Streusel.bmp	Laysclassic.bmp	24	23	0	i	4	1	0.744246	26	30	0.46	0.44	2	day2	1
BM2_658	0	1	1	1	7	28	FigNewton_small.bmp	Reeses.bmp	22	21	0	i	3	1	0.693001	19	17	0.786667	0.813333	2	day2	1
BM2_658	0	1	1	1	8	32	PayDay.bmp	PopTartsCinnamon.bmp	21	22	1	u	3	1	1.193715	23	22	0.6	0.713333	2	day2	1
BM2_658	0	1	1	1	9	38	Oreos.bmp	FamousAmos_small.bmp	11	12	1	u	1	1	0.991868	9	6	0.933333	1.013333	2	day2	1
BM2_658	0	1	1	1	10	42	Reeses.bmp	PeanutMMs.bmp	21	22	1	i	3	0	0.853192	17	20	0.813333	0.786667	2	day2	1
BM2_658	0	1	1	1	11	45	Twix.bmp	Almondjoy.bmp	11	12	1	i	1	0	1.052277	3	8	1.033333	1	2	day2	1
BM2_658	0	1	1	1	12	48	Almondjoy.bmp	Oreos.bmp	12	11	0	u	1	0	0.795996	8	9	1	0.933333	2	day2	1
BM2_658	0	1	1	1	13	52	PeanutMMs.bmp	PopTartsStrawberry.bmp	22	21	0	u	3	0	0.80005	20	21	0.786667	0.733333	2	day2	1
BM2_658	0	1	1	1	14	61	KitKat_small.bmp	100grand_small.bmp	24	23	0	i	4	1	1.062551	29	28	0.44	0.446667	2	day2	1
BM2_658	0	1	1	1	15	68	Laysclassic.bmp	Toberlorone.bmp	23	24	1	u	4	1	0.850336	30	27	0.44	0.46	2	day2	1
BM2_658	0	1	1	1	16	73	Nutterbutter.bmp	Almondjoy.bmp	11	12	1	u	1	1	0.780096	7	8	1.013333	1	2	day2	1
BM2_658	0	1	1	1	17	77	BabyRuth.bmp	Butterfinger.bmp	14	13	0	i	2	1	0.912842	13	16	0.833333	0.813333	2	day2	1
BM2_658	0	1	1	1	18	80	PayDay.bmp	FigNewton_small.bmp	21	22	1	u	3	1	1.191888	23	19	0.6	0.786667	2	day2	1
BM2_658	0	1	1	1	19	84	100grand_small.bmp	Streusel.bmp	23	24	1	u	4	1	0.852554	28	26	0.446667	0.46	2	day2	1
BM2_658	0	1	1	1	20	93	Fritos.bmp	Streusel.bmp	23	24	1	u	4	1	0.731079	24	26	0.546667	0.46	2	day2	1
BM2_658	0	1	1	1	21	98	BabyRuth.bmp	Milano.bmp	14	13	0	i	2	1	0.90887	13	14	0.833333	0.826667	2	day2	1
BM2_658	0	1	1	1	22	101	Twix.bmp	AnimalCrackers.bmp	11	12	1	i	1	0	0.875912	3	5	1.033333	1.02	2	day2	1
BM2_658	0	1	1	1	23	104	FamousAmos_small.bmp	Nutterbutter.bmp	12	11	0	i	1	1	0.931586	6	7	1.013333	1.013333	2	day2	1
BM2_658	0	1	1	1	24	108	Doritosranch.bmp	Whatchamacallit.bmp	13	14	1	u	2	1	0.911714	10	15	0.913333	0.82	2	day2	1
BM2_658	0	1	1	1	25	111	Butterfinger.bmp	Whatchamacallit.bmp	13	14	1	u	2	1	0.839431	16	15	0.813333	0.82	2	day2	1
BM2_658	0	1	1	1	26	114	Granolabar.bmp	Butterfinger.bmp	14	13	0	u	2	0	0.983167	12	16	0.853333	0.813333	2	day2	1
BM2_658	0	1	1	1	27	123	KitKat_small.bmp	Laysclassic.bmp	24	23	0	i	4	1	0.804987	29	30	0.44	0.44	2	day2	1
BM2_658	0	1	1	1	28	126	Reeses.bmp	PopTartsCinnamon.bmp	21	22	1	u	3	1	0.668698	17	22	0.813333	0.713333	2	day2	1
BM2_658	0	1	1	1	29	130	FigNewton_small.bmp	PopTartsStrawberry.bmp	22	21	0	u	3	0	0.720742	19	21	0.786667	0.733333	2	day2	1
BM2_658	0	1	1	1	30	135	PopTartsCinnamon.bmp	PopTartsStrawberry.bmp	22	21	0	i	3	1	0.986479	22	21	0.713333	0.733333	2	day2	1
BM2_658	0	1	1	1	31	148	Oreos.bmp	AnimalCrackers.bmp	11	12	1	i	1	0	0.933739	9	5	0.933333	1.02	2	day2	1
BM2_658	0	1	1	1	32	151	Granolabar.bmp	Milano.bmp	14	13	0	u	2	0	0.812777	12	14	0.853333	0.826667	2	day2	1
BM2_658	0	1	1	1	33	154	Fritos.bmp	KitKat_small.bmp	23	24	1	u	4	1	0.900365	24	29	0.546667	0.44	2	day2	1
BM2_658	0	1	1	1	34	160	Doritosranch.bmp	BabyRuth.bmp	13	14	1	u	2	1	0.771206	10	13	0.913333	0.833333	2	day2	1
BM2_658	0	1	1	1	35	164	Toberlorone.bmp	100grand_small.bmp	24	23	0	i	4	1	0.735995	27	28	0.46	0.446667	2	day2	1
BM2_658	0	1	1	1	36	168	Nutterbutter.bmp	AnimalCrackers.bmp	11	12	1	u	1	1	1.100016	7	5	1.013333	1.02	2	day2	1
BM2_658	0	1	1	2	37	171	Laysclassic.bmp	KitKat_small.bmp	23	24	1	u	4	1	0.747713	30	29	0.44	0.44	2	day2	1
BM2_658	0	1	1	2	38	177	Doritosranch.bmp	BabyRuth.bmp	13	14	1	u	2	1	0.738578	10	13	0.913333	0.833333	2	day2	1
BM2_658	0	1	1	2	39	181	Almondjoy.bmp	Nutterbutter.bmp	12	11	0	i	1	1	1.039321	8	7	1	1.013333	2	day2	1
BM2_658	0	1	1	2	40	187	Reeses.bmp	PeanutMMs.bmp	21	22	1	u	3	1	1.0941	17	20	0.813333	0.786667	2	day2	1
BM2_658	0	1	1	2	41	192	Doritosranch.bmp	Whatchamacallit.bmp	13	14	1	u	2	1	0.727145	10	15	0.913333	0.82	2	day2	1
BM2_658	0	1	1	2	42	202	Butterfinger.bmp	BabyRuth.bmp	13	14	1	u	2	1	0.834577	16	13	0.813333	0.833333	2	day2	1
BM2_658	0	1	1	2	43	212	PeanutMMs.bmp	PayDay.bmp	22	21	0	u	3	0	0.750195	20	23	0.786667	0.6	2	day2	1
BM2_658	0	1	1	2	44	220	Fritos.bmp	KitKat_small.bmp	23	24	1	u	4	1	0.607659	24	29	0.546667	0.44	2	day2	1
BM2_658	0	1	1	2	45	224	Fritos.bmp	Streusel.bmp	23	24	1	u	4	1	0.595618	24	26	0.546667	0.46	2	day2	1
BM2_658	0	1	1	2	46	227	KitKat_small.bmp	100grand_small.bmp	24	23	0	i	4	1	0.859439	29	28	0.44	0.446667	2	day2	1
BM2_658	0	1	1	2	47	230	Twix.bmp	Almondjoy.bmp	11	12	1	i	1	0	0.906392	3	8	1.033333	1	2	day2	1
BM2_658	0	1	1	2	48	233	Streusel.bmp	100grand_small.bmp	24	23	0	i	4	1	0.834104	26	28	0.46	0.446667	2	day2	1
BM2_658	0	1	1	2	49	241	Twix.bmp	FamousAmos_small.bmp	11	12	1	u	1	1	0.842982	3	6	1.033333	1.013333	2	day2	1
BM2_658	0	1	1	2	50	244	Oreos.bmp	Almondjoy.bmp	11	12	1	i	1	0	0.874703	9	8	0.933333	1	2	day2	1
BM2_658	0	1	1	2	51	252	PopTartsCinnamon.bmp	Reeses.bmp	22	21	0	i	3	1	0.779509	22	17	0.713333	0.813333	2	day2	1
BM2_658	0	1	1	2	52	259	Streusel.bmp	Laysclassic.bmp	24	23	0	i	4	1	0.567969	26	30	0.46	0.44	2	day2	1
BM2_658	0	1	1	2	53	262	FamousAmos_small.bmp	Oreos.bmp	12	11	0	i	1	1	0.655059	6	9	1.013333	0.933333	2	day2	1
BM2_658	0	1	1	2	54	269	FigNewton_small.bmp	Reeses.bmp	22	21	0	i	3	1	0.930802	19	17	0.786667	0.813333	2	day2	1
BM2_658	0	1	1	2	55	273	FigNewton_small.bmp	PopTartsStrawberry.bmp	22	21	0	u	3	0	0.727499	19	21	0.786667	0.733333	2	day2	1
BM2_658	0	1	1	2	56	282	Toberlorone.bmp	Fritos.bmp	24	23	0	i	4	1	0.637995	27	24	0.46	0.546667	2	day2	1
BM2_658	0	1	1	2	57	286	PopTartsStrawberry.bmp	PeanutMMs.bmp	21	22	1	i	3	0	0.7061	21	20	0.733333	0.786667	2	day2	1
BM2_658	0	1	1	2	58	300	Butterfinger.bmp	Granolabar.bmp	13	14	1	i	2	0	0.738278	16	12	0.813333	0.853333	2	day2	1
BM2_658	0	1	1	2	59	303	Milano.bmp	Whatchamacallit.bmp	13	14	1	u	2	1	0.857317	14	15	0.826667	0.82	2	day2	1
BM2_658	0	1	1	2	60	306	AnimalCrackers.bmp	Twix.bmp	12	11	0	u	1	0	1.185062	5	3	1.02	1.033333	2	day2	1
BM2_658	0	1	1	2	61	309	Doritosranch.bmp	Granolabar.bmp	13	14	1	i	2	0	1.248182	10	12	0.913333	0.853333	2	day2	1
BM2_658	0	1	1	2	62	312	AnimalCrackers.bmp	Nutterbutter.bmp	12	11	0	i	1	1	1.143884	5	7	1.02	1.013333	2	day2	1
BM2_658	0	1	1	2	63	315	100grand_small.bmp	Toberlorone.bmp	23	24	1	u	4	1	1.319635	28	27	0.446667	0.46	2	day2	1
BM2_658	0	1	1	2	64	318	PayDay.bmp	PopTartsCinnamon.bmp	21	22	1	u	3	1	0.742667	23	22	0.6	0.713333	2	day2	1
BM2_658	0	1	1	2	65	324	FigNewton_small.bmp	PayDay.bmp	22	21	0	u	3	0	0.76543	19	23	0.786667	0.6	2	day2	1
BM2_658	0	1	1	2	66	328	Granolabar.bmp	Milano.bmp	14	13	0	i	2	1	1.186199	12	14	0.853333	0.826667	2	day2	1
BM2_658	0	1	1	2	67	333	Toberlorone.bmp	Laysclassic.bmp	24	23	0	i	4	1	0.907933	27	30	0.46	0.44	2	day2	1
BM2_658	0	1	1	2	68	339	FamousAmos_small.bmp	Nutterbutter.bmp	12	11	0	i	1	1	0.658609	6	7	1.013333	1.013333	2	day2	1
BM2_658	0	1	1	2	69	342	Oreos.bmp	AnimalCrackers.bmp	11	12	1	i	1	0	0.729722	9	5	0.933333	1.02	2	day2	1
BM2_658	0	1	1	2	70	345	PopTartsCinnamon.bmp	PopTartsStrawberry.bmp	22	21	0	i	3	1	0.729475	22	21	0.713333	0.733333	2	day2	1
BM2_658	0	1	1	2	71	349	BabyRuth.bmp	Milano.bmp	14	13	0	i	2	1	0.990197	13	14	0.833333	0.826667	2	day2	1
BM2_658	0	1	1	2	72	352	Butterfinger.bmp	Whatchamacallit.bmp	13	14	1	u	2	1	0.701233	16	15	0.813333	0.82	2	day2	1
BM2_659	0	2	1	1	1	0	Riprolls.bmp	Ghiradelli_milk.bmp	22	21	0	i	3	1	0.522861	5	3	2.54	2.753333	2	day2	1
BM2_659	0	2	1	1	2	9	Laysclassic.bmp	AnimalCrackers.bmp	12	11	0	u	1	0	0.538045	20	23	1.753333	1.54	2	day2	1
BM2_659	0	2	1	1	3	12	Jollyranchergreen.bmp	Lollipopred.bmp	13	14	1	u	2	1	0.577018	28	29	1.246667	1.046667	2	day2	1
BM2_659	0	2	1	1	4	17	Slimjim.bmp	Hersheymilk_several.bmp	22	21	0	u	3	0	0.802864	8	9	2.346667	2.18	2	day2	1
BM2_659	0	2	1	1	5	26	Jollyranchergreen.bmp	Twix.bmp	13	14	1	u	2	1	0.697273	28	26	1.246667	1.413333	2	day2	1
BM2_659	0	2	1	1	6	32	Jollyranchergreen.bmp	Cupcakes.bmp	13	14	1	u	2	1	0.720132	28	27	1.246667	1.253333	2	day2	1
BM2_659	0	2	1	1	7	35	Slimjim.bmp	Ghiradelli_milk.bmp	22	21	0	i	3	1	0.687166	8	3	2.346667	2.753333	2	day2	1
BM2_659	0	2	1	1	8	48	Hersheymilk_several.bmp	Riprolls.bmp	21	22	1	u	3	1	0.826421	9	5	2.18	2.54	2	day2	1
BM2_659	0	2	1	1	9	58	MrGoodbar.bmp	SourSkittles.bmp	24	23	0	i	4	1	0.717944	13	10	2.113333	2.173333	2	day2	1
BM2_659	0	2	1	1	10	63	Chocolate_mm.bmp	Toberlorone.bmp	21	22	1	u	3	1	0.558987	7	6	2.513333	2.52	2	day2	1
BM2_659	0	2	1	1	11	66	FlamingCheetos.bmp	ChipsAhoy_small.bmp	11	12	1	i	1	0	0.597938	17	19	1.88	1.86	2	day2	1
BM2_659	0	2	1	1	12	69	Twix.bmp	PeanutMMs.bmp	14	13	0	i	2	1	0.622435	26	24	1.413333	1.52	2	day2	1
BM2_659	0	2	1	1	13	72	Sourpatch.bmp	Milkduds.bmp	23	24	1	u	4	1	0.645485	14	12	2.106667	2.146667	2	day2	1
BM2_659	0	2	1	1	14	82	SourSkittles.bmp	Milkduds.bmp	23	24	1	u	4	1	0.624997	10	12	2.173333	2.146667	2	day2	1
BM2_659	0	2	1	1	15	85	Sourpatch.bmp	MrGoodbar.bmp	23	24	1	u	4	1	0.672064	14	13	2.106667	2.113333	2	day2	1
BM2_659	0	2	1	1	16	95	MrGoodbar.bmp	Skittles.bmp	24	23	0	i	4	1	0.659487	13	16	2.113333	1.993333	2	day2	1
BM2_659	0	2	1	1	17	98	Lollipopred.bmp	PringlesRed.bmp	14	13	0	i	2	1	0.755216	29	30	1.046667	1.046667	2	day2	1
BM2_659	0	2	1	1	18	101	Laysclassic.bmp	FlamingCheetos.bmp	12	11	0	u	1	0	0.834333	20	17	1.753333	1.88	2	day2	1
BM2_659	0	2	1	1	19	105	ChipsAhoy_small.bmp	KitKat_small.bmp	12	11	0	i	1	1	1.270049	19	21	1.86	1.746667	2	day2	1
BM2_659	0	2	1	1	20	109	Laysclassic.bmp	KitKat_small.bmp	12	11	0	i	1	1	0.635818	20	21	1.753333	1.746667	2	day2	1
BM2_659	0	2	1	1	21	113	Jollyrancherred.bmp	FlamingCheetos.bmp	12	11	0	u	1	0	0.671895	22	17	1.726667	1.88	2	day2	1
BM2_659	0	2	1	1	22	119	Twix.bmp	PringlesRed.bmp	14	13	0	x	2	NA	NA	26	30	1.413333	1.046667	2	day2	1
BM2_659	0	2	1	1	23	123	Toberlorone.bmp	Hersheymilk_several.bmp	22	21	0	i	3	1	0.723388	6	9	2.52	2.18	2	day2	1
BM2_659	0	2	1	1	24	132	Lollipopred.bmp	PeanutMMs.bmp	14	13	0	i	2	1	0.785892	29	24	1.046667	1.52	2	day2	1
BM2_659	0	2	1	1	25	140	Ghiradelli_milk.bmp	Toberlorone.bmp	21	22	1	u	3	1	0.674706	3	6	2.753333	2.52	2	day2	1
BM2_659	0	2	1	1	26	144	Chocolate_mm.bmp	Riprolls.bmp	21	22	1	u	3	1	0.663429	7	5	2.513333	2.54	2	day2	1
BM2_659	0	2	1	1	27	147	Sourpatch.bmp	PopTartsCinnamon.bmp	23	24	1	u	4	1	0.838458	14	15	2.106667	2	2	day2	1
BM2_659	0	2	1	1	28	151	Slimjim.bmp	Chocolate_mm.bmp	22	21	0	u	3	0	0.803209	8	7	2.346667	2.513333	2	day2	1
BM2_659	0	2	1	1	29	154	KitKat_small.bmp	Jollyrancherred.bmp	11	12	1	u	1	1	0.914854	21	22	1.746667	1.726667	2	day2	1
BM2_659	0	2	1	1	30	158	SourSkittles.bmp	PopTartsCinnamon.bmp	23	24	1	u	4	1	0.66291	10	15	2.173333	2	2	day2	1
BM2_659	0	2	1	1	31	161	AnimalCrackers.bmp	Jollyrancherred.bmp	11	12	1	i	1	0	0.757905	23	22	1.54	1.726667	2	day2	1
BM2_659	0	2	1	1	32	167	Skittles.bmp	PopTartsCinnamon.bmp	23	24	1	u	4	1	0.589495	16	15	1.993333	2	2	day2	1
BM2_659	0	2	1	1	33	170	AnimalCrackers.bmp	ChipsAhoy_small.bmp	11	12	1	i	1	0	0.58117	23	19	1.54	1.86	2	day2	1
BM2_659	0	2	1	1	34	174	PeanutMMs.bmp	Cupcakes.bmp	13	14	1	u	2	1	0.609256	24	27	1.52	1.253333	2	day2	1
BM2_659	0	2	1	1	35	179	Milkduds.bmp	Skittles.bmp	24	23	0	i	4	1	0.539031	12	16	2.146667	1.993333	2	day2	1
BM2_659	0	2	1	1	36	182	Cupcakes.bmp	PringlesRed.bmp	14	13	0	i	2	1	0.666769	27	30	1.253333	1.046667	2	day2	1
BM2_659	0	2	1	2	37	185	AnimalCrackers.bmp	ChipsAhoy_small.bmp	11	12	1	i	1	0	0.609803	23	19	1.54	1.86	2	day2	1
BM2_659	0	2	1	2	38	188	AnimalCrackers.bmp	Laysclassic.bmp	11	12	1	u	1	1	0.833537	23	20	1.54	1.753333	2	day2	1
BM2_659	0	2	1	2	39	191	Cupcakes.bmp	Jollyranchergreen.bmp	14	13	0	i	2	1	0.584581	27	28	1.253333	1.246667	2	day2	1
BM2_659	0	2	1	2	40	195	Ghiradelli_milk.bmp	Slimjim.bmp	21	22	1	u	3	1	0.67732	3	8	2.753333	2.346667	2	day2	1
BM2_659	0	2	1	2	41	200	Toberlorone.bmp	Ghiradelli_milk.bmp	22	21	0	i	3	1	0.639066	6	3	2.52	2.753333	2	day2	1
BM2_659	0	2	1	2	42	204	Skittles.bmp	MrGoodbar.bmp	23	24	1	u	4	1	0.707791	16	13	1.993333	2.113333	2	day2	1
BM2_659	0	2	1	2	43	208	Jollyrancherred.bmp	AnimalCrackers.bmp	12	11	0	u	1	0	0.63186	22	23	1.726667	1.54	2	day2	1
BM2_659	0	2	1	2	44	212	Toberlorone.bmp	Chocolate_mm.bmp	22	21	0	i	3	1	0.652632	6	7	2.52	2.513333	2	day2	1
BM2_659	0	2	1	2	45	218	Lollipopred.bmp	PringlesRed.bmp	14	13	0	u	2	0	0.803352	29	30	1.046667	1.046667	2	day2	1
BM2_659	0	2	1	2	46	224	PopTartsCinnamon.bmp	Skittles.bmp	24	23	0	i	4	1	0.810151	15	16	2	1.993333	2	day2	1
BM2_659	0	2	1	2	47	229	Riprolls.bmp	Chocolate_mm.bmp	22	21	0	i	3	1	0.571934	5	7	2.54	2.513333	2	day2	1
BM2_659	0	2	1	2	48	236	KitKat_small.bmp	Laysclassic.bmp	11	12	1	u	1	1	0.671639	21	20	1.746667	1.753333	2	day2	1
BM2_659	0	2	1	2	49	240	Cupcakes.bmp	PringlesRed.bmp	14	13	0	i	2	1	0.764374	27	30	1.253333	1.046667	2	day2	1
BM2_659	0	2	1	2	50	250	Twix.bmp	PringlesRed.bmp	14	13	0	i	2	1	0.919947	26	30	1.413333	1.046667	2	day2	1
BM2_659	0	2	1	2	51	260	Milkduds.bmp	Skittles.bmp	24	23	0	i	4	1	0.691367	12	16	2.146667	1.993333	2	day2	1
BM2_659	0	2	1	2	52	264	Hersheymilk_several.bmp	Riprolls.bmp	21	22	1	u	3	1	0.727431	9	5	2.18	2.54	2	day2	1
BM2_659	0	2	1	2	53	271	Twix.bmp	PeanutMMs.bmp	14	13	0	i	2	1	0.539991	26	24	1.413333	1.52	2	day2	1
BM2_659	0	2	1	2	54	275	SourSkittles.bmp	Milkduds.bmp	23	24	1	u	4	1	0.696026	10	12	2.173333	2.146667	2	day2	1
BM2_659	0	2	1	2	55	279	PeanutMMs.bmp	Cupcakes.bmp	13	14	1	i	2	0	0.956688	24	27	1.52	1.253333	2	day2	1
BM2_659	0	2	1	2	56	283	FlamingCheetos.bmp	Jollyrancherred.bmp	11	12	1	u	1	1	1.041486	17	22	1.88	1.726667	2	day2	1
BM2_659	0	2	1	2	57	286	Ghiradelli_milk.bmp	Riprolls.bmp	21	22	1	u	3	1	0.60056	3	5	2.753333	2.54	2	day2	1
BM2_659	0	2	1	2	58	289	Laysclassic.bmp	FlamingCheetos.bmp	12	11	0	i	1	1	0.624292	20	17	1.753333	1.88	2	day2	1
BM2_659	0	2	1	2	59	293	FlamingCheetos.bmp	ChipsAhoy_small.bmp	11	12	1	i	1	0	0.85303	17	19	1.88	1.86	2	day2	1
BM2_659	0	2	1	2	60	296	PopTartsCinnamon.bmp	SourSkittles.bmp	24	23	0	i	4	1	0.64399	15	10	2	2.173333	2	day2	1
BM2_659	0	2	1	2	61	299	Chocolate_mm.bmp	Slimjim.bmp	21	22	1	u	3	1	1.171825	7	8	2.513333	2.346667	2	day2	1
BM2_659	0	2	1	2	62	306	PopTartsCinnamon.bmp	Sourpatch.bmp	24	23	0	i	4	1	0.559585	15	14	2	2.106667	2	day2	1
BM2_659	0	2	1	2	63	311	KitKat_small.bmp	Jollyrancherred.bmp	11	12	1	u	1	1	0.761351	21	22	1.746667	1.726667	2	day2	1
BM2_659	0	2	1	2	64	317	ChipsAhoy_small.bmp	KitKat_small.bmp	12	11	0	u	1	0	0.648108	19	21	1.86	1.746667	2	day2	1
BM2_659	0	2	1	2	65	320	Jollyranchergreen.bmp	Lollipopred.bmp	13	14	1	u	2	1	0.647128	28	29	1.246667	1.046667	2	day2	1
BM2_659	0	2	1	2	66	324	Hersheymilk_several.bmp	Toberlorone.bmp	21	22	1	u	3	1	0.619894	9	6	2.18	2.52	2	day2	1
BM2_659	0	2	1	2	67	327	PeanutMMs.bmp	Lollipopred.bmp	13	14	1	u	2	1	0.523541	24	29	1.52	1.046667	2	day2	1
BM2_659	0	2	1	2	68	330	Twix.bmp	Jollyranchergreen.bmp	14	13	0	i	2	1	0.842648	26	28	1.413333	1.246667	2	day2	1
BM2_659	0	2	1	2	69	333	Slimjim.bmp	Hersheymilk_several.bmp	22	21	0	u	3	0	1.034415	8	9	2.346667	2.18	2	day2	1
BM2_659	0	2	1	2	70	341	MrGoodbar.bmp	SourSkittles.bmp	24	23	0	i	4	1	0.739171	13	10	2.113333	2.173333	2	day2	1
BM2_659	0	2	1	2	71	344	Sourpatch.bmp	Milkduds.bmp	23	24	1	u	4	1	0.7949	14	12	2.106667	2.146667	2	day2	1
BM2_659	0	2	1	2	72	352	Sourpatch.bmp	MrGoodbar.bmp	23	24	1	u	4	1	0.947727	14	13	2.106667	2.113333	2	day2	1
BM2_660	0	1	2	1	1	0	Chocolate_mm.bmp	Twix.bmp	14	13	0	u	2	0	1.036641	16	15	1.426667	1.446667	2	day2	1
BM2_660	0	1	2	1	2	9	BabyRuth.bmp	Cheezits.bmp	21	22	1	i	3	0	1.212612	19	21	1.386667	1.086667	2	day2	1
BM2_660	0	1	2	1	3	12	Twix.bmp	Oreos.bmp	13	14	1	i	2	0	0.77964	15	14	1.446667	1.446667	2	day2	1
BM2_660	0	1	2	1	4	17	TeddyGrahamschocolate.bmp	Cheezits.bmp	21	22	1	i	3	0	0.917406	20	21	1.1	1.086667	2	day2	1
BM2_660	0	1	2	1	5	26	100grand_small.bmp	Milkduds.bmp	24	23	0	i	4	1	0.891888	24	26	1.066667	1.066667	2	day2	1
BM2_660	0	1	2	1	6	32	Keeblerfudgestripes.bmp	Laysclassic.bmp	23	24	1	u	4	1	0.890682	27	28	1.053333	1.046667	2	day2	1
BM2_660	0	1	2	1	7	35	100grand_small.bmp	KitKat_small.bmp	24	23	0	i	4	1	0.68972	24	29	1.066667	1.04	2	day2	1
BM2_660	0	1	2	1	8	48	Goldfish.bmp	CheesyDoritos.bmp	21	22	1	i	3	0	1.132965	22	23	1.08	1.073333	2	day2	1
BM2_660	0	1	2	1	9	58	FamousAmos_small.bmp	MilkyWay.bmp	11	12	1	u	1	1	0.776466	8	9	1.94	1.933333	2	day2	1
BM2_660	0	1	2	1	10	63	Ghiradelli_milk_Almonds.bmp	3Musketeers.bmp	12	11	0	u	1	0	0.753538	3	6	2.493333	1.986667	2	day2	1
BM2_660	0	1	2	1	11	66	3Musketeers.bmp	Snickers.bmp	11	12	1	u	1	1	1.00886	6	7	1.986667	1.96	2	day2	1
BM2_660	0	1	2	1	12	69	Almondjoy.bmp	Ghiradelli_milk_Almonds.bmp	11	12	1	u	1	1	1.048293	5	3	2.046667	2.493333	2	day2	1
BM2_660	0	1	2	1	13	72	Cupcakes.bmp	Milkduds.bmp	24	23	0	i	4	1	0.880031	30	26	1.033333	1.066667	2	day2	1
BM2_660	0	1	2	1	14	82	CheesyDoritos.bmp	TeddyGrahamschocolate.bmp	22	21	0	u	3	0	1.259569	23	20	1.073333	1.1	2	day2	1
BM2_660	0	1	2	1	15	85	Oreos.bmp	PeanutMMs.bmp	14	13	0	u	2	0	0.898601	14	12	1.446667	1.46	2	day2	1
BM2_660	0	1	2	1	16	95	Reeses.bmp	Oreos.bmp	13	14	1	u	2	1	1.20611	13	14	1.46	1.446667	2	day2	1
BM2_660	0	1	2	1	17	98	TeddyGrahamschocolate.bmp	HoHo.bmp	21	22	1	u	3	1	1.021843	20	17	1.1	1.426667	2	day2	1
BM2_660	0	1	2	1	18	101	MilkyWay.bmp	3Musketeers.bmp	12	11	0	u	1	0	1.020898	9	6	1.933333	1.986667	2	day2	1
BM2_660	0	1	2	1	19	105	BabyRuth.bmp	CheesyDoritos.bmp	21	22	1	i	3	0	0.960735	19	23	1.386667	1.073333	2	day2	1
BM2_660	0	1	2	1	20	109	FamousAmos_small.bmp	Ghiradelli_milk_Almonds.bmp	11	12	1	u	1	1	0.92639	8	3	1.94	2.493333	2	day2	1
BM2_660	0	1	2	1	21	113	Almondjoy.bmp	MilkyWay.bmp	11	12	1	u	1	1	0.978427	5	9	2.046667	1.933333	2	day2	1
BM2_660	0	1	2	1	22	119	ChipsAhoy_small.bmp	PeanutMMs.bmp	14	13	0	u	2	0	1.305175	10	12	1.54	1.46	2	day2	1
BM2_660	0	1	2	1	23	123	BabyRuth.bmp	HoHo.bmp	21	22	1	i	3	0	0.941929	19	17	1.386667	1.426667	2	day2	1
BM2_660	0	1	2	1	24	132	Laysclassic.bmp	Milkduds.bmp	24	23	0	u	4	0	1.196461	28	26	1.046667	1.066667	2	day2	1
BM2_660	0	1	2	1	25	140	Chocolate_mm.bmp	Reeses.bmp	14	13	0	u	2	0	0.885232	16	13	1.426667	1.46	2	day2	1
BM2_660	0	1	2	1	26	144	KitKat_small.bmp	Laysclassic.bmp	23	24	1	u	4	1	1.024825	29	28	1.04	1.046667	2	day2	1
BM2_660	0	1	2	1	27	147	Reeses.bmp	ChipsAhoy_small.bmp	13	14	1	i	2	0	1.017021	13	10	1.46	1.54	2	day2	1
BM2_660	0	1	2	1	28	151	ChipsAhoy_small.bmp	Twix.bmp	14	13	0	u	2	0	1.005791	10	15	1.54	1.446667	2	day2	1
BM2_660	0	1	2	1	29	154	FamousAmos_small.bmp	Snickers.bmp	11	12	1	u	1	1	0.925527	8	7	1.94	1.96	2	day2	1
BM2_660	0	1	2	1	30	158	Cupcakes.bmp	Keeblerfudgestripes.bmp	24	23	0	i	4	1	0.913568	30	27	1.033333	1.053333	2	day2	1
BM2_660	0	1	2	1	31	161	Almondjoy.bmp	Snickers.bmp	11	12	1	u	1	1	1.232754	5	7	2.046667	1.96	2	day2	1
BM2_660	0	1	2	1	32	167	Cheezits.bmp	Goldfish.bmp	22	21	0	u	3	0	1.000036	21	22	1.086667	1.08	2	day2	1
BM2_660	0	1	2	1	33	170	Cupcakes.bmp	KitKat_small.bmp	24	23	0	i	4	1	1.047792	30	29	1.033333	1.04	2	day2	1
BM2_660	0	1	2	1	34	174	Chocolate_mm.bmp	PeanutMMs.bmp	14	13	0	u	2	0	0.979875	16	12	1.426667	1.46	2	day2	1
BM2_660	0	1	2	1	35	179	HoHo.bmp	Goldfish.bmp	22	21	0	u	3	0	0.725616	17	22	1.426667	1.08	2	day2	1
BM2_660	0	1	2	1	36	182	100grand_small.bmp	Keeblerfudgestripes.bmp	24	23	0	i	4	1	1.061353	24	27	1.066667	1.053333	2	day2	1
BM2_660	0	1	2	2	37	185	Chocolate_mm.bmp	Reeses.bmp	14	13	0	i	2	1	1.380395	16	13	1.426667	1.46	2	day2	1
BM2_660	0	1	2	2	38	188	Keeblerfudgestripes.bmp	100grand_small.bmp	23	24	1	u	4	1	0.972096	27	24	1.053333	1.066667	2	day2	1
BM2_660	0	1	2	2	39	191	100grand_small.bmp	Milkduds.bmp	24	23	0	i	4	1	0.755195	24	26	1.066667	1.066667	2	day2	1
BM2_660	0	1	2	2	40	195	TeddyGrahamschocolate.bmp	HoHo.bmp	21	22	1	i	3	0	1.111896	20	17	1.1	1.426667	2	day2	1
BM2_660	0	1	2	2	41	200	Twix.bmp	Oreos.bmp	13	14	1	i	2	0	0.920686	15	14	1.446667	1.446667	2	day2	1
BM2_660	0	1	2	2	42	204	ChipsAhoy_small.bmp	Reeses.bmp	14	13	0	u	2	0	0.998402	10	13	1.54	1.46	2	day2	1
BM2_660	0	1	2	2	43	208	Chocolate_mm.bmp	PeanutMMs.bmp	14	13	0	i	2	1	0.922459	16	12	1.426667	1.46	2	day2	1
BM2_660	0	1	2	2	44	212	Laysclassic.bmp	Milkduds.bmp	24	23	0	u	4	0	1.111219	28	26	1.046667	1.066667	2	day2	1
BM2_660	0	1	2	2	45	218	3Musketeers.bmp	Ghiradelli_milk_Almonds.bmp	11	12	1	i	1	0	1.229953	6	3	1.986667	2.493333	2	day2	1
BM2_660	0	1	2	2	46	224	Cheezits.bmp	BabyRuth.bmp	22	21	0	u	3	0	0.948729	21	19	1.086667	1.386667	2	day2	1
BM2_660	0	1	2	2	47	229	BabyRuth.bmp	CheesyDoritos.bmp	21	22	1	i	3	0	0.854513	19	23	1.386667	1.073333	2	day2	1
BM2_660	0	1	2	2	48	236	MilkyWay.bmp	3Musketeers.bmp	12	11	0	u	1	0	1.074278	9	6	1.933333	1.986667	2	day2	1
BM2_660	0	1	2	2	49	240	Chocolate_mm.bmp	Twix.bmp	14	13	0	u	2	0	0.999044	16	15	1.426667	1.446667	2	day2	1
BM2_660	0	1	2	2	50	250	Goldfish.bmp	Cheezits.bmp	21	22	1	i	3	0	0.930558	22	21	1.08	1.086667	2	day2	1
BM2_660	0	1	2	2	51	260	PeanutMMs.bmp	Oreos.bmp	13	14	1	i	2	0	0.814086	12	14	1.46	1.446667	2	day2	1
BM2_660	0	1	2	2	52	264	100grand_small.bmp	KitKat_small.bmp	24	23	0	i	4	1	0.834101	24	29	1.066667	1.04	2	day2	1
BM2_660	0	1	2	2	53	271	BabyRuth.bmp	HoHo.bmp	21	22	1	i	3	0	0.878587	19	17	1.386667	1.426667	2	day2	1
BM2_660	0	1	2	2	54	275	KitKat_small.bmp	Cupcakes.bmp	23	24	1	i	4	0	1.074659	29	30	1.04	1.033333	2	day2	1
BM2_660	0	1	2	2	55	279	PeanutMMs.bmp	ChipsAhoy_small.bmp	13	14	1	u	2	1	1.215398	12	10	1.46	1.54	2	day2	1
BM2_660	0	1	2	2	56	283	CheesyDoritos.bmp	TeddyGrahamschocolate.bmp	22	21	0	i	3	1	0.884141	23	20	1.073333	1.1	2	day2	1
BM2_660	0	1	2	2	57	286	MilkyWay.bmp	FamousAmos_small.bmp	12	11	0	u	1	0	1.107168	9	8	1.933333	1.94	2	day2	1
BM2_660	0	1	2	2	58	289	3Musketeers.bmp	Snickers.bmp	11	12	1	i	1	0	0.970912	6	7	1.986667	1.96	2	day2	1
BM2_660	0	1	2	2	59	293	Goldfish.bmp	HoHo.bmp	21	22	1	i	3	0	0.719653	22	17	1.08	1.426667	2	day2	1
BM2_660	0	1	2	2	60	296	Twix.bmp	ChipsAhoy_small.bmp	13	14	1	i	2	0	1.03069	15	10	1.446667	1.54	2	day2	1
BM2_660	0	1	2	2	61	299	Reeses.bmp	Oreos.bmp	13	14	1	i	2	0	0.694456	13	14	1.46	1.446667	2	day2	1
BM2_660	0	1	2	2	62	306	FamousAmos_small.bmp	Snickers.bmp	11	12	1	i	1	0	0.906208	8	7	1.94	1.96	2	day2	1
BM2_660	0	1	2	2	63	311	Cupcakes.bmp	Keeblerfudgestripes.bmp	24	23	0	u	4	0	0.979992	30	27	1.033333	1.053333	2	day2	1
BM2_660	0	1	2	2	64	317	Ghiradelli_milk_Almonds.bmp	FamousAmos_small.bmp	12	11	0	u	1	0	0.754768	3	8	2.493333	1.94	2	day2	1
BM2_660	0	1	2	2	65	320	Snickers.bmp	Almondjoy.bmp	12	11	0	u	1	0	0.993771	7	5	1.96	2.046667	2	day2	1
BM2_660	0	1	2	2	66	324	Almondjoy.bmp	MilkyWay.bmp	11	12	1	u	1	1	1.094531	5	9	2.046667	1.933333	2	day2	1
BM2_660	0	1	2	2	67	327	TeddyGrahamschocolate.bmp	Cheezits.bmp	21	22	1	u	3	1	1.270258	20	21	1.1	1.086667	2	day2	1
BM2_660	0	1	2	2	68	330	Cupcakes.bmp	Milkduds.bmp	24	23	0	u	4	0	0.837319	30	26	1.033333	1.066667	2	day2	1
BM2_660	0	1	2	2	69	333	Laysclassic.bmp	KitKat_small.bmp	24	23	0	i	4	1	1.181053	28	29	1.046667	1.04	2	day2	1
BM2_660	0	1	2	2	70	341	Ghiradelli_milk_Almonds.bmp	Almondjoy.bmp	12	11	0	u	1	0	0.789826	3	5	2.493333	2.046667	2	day2	1
BM2_660	0	1	2	2	71	344	Keeblerfudgestripes.bmp	Laysclassic.bmp	23	24	1	i	4	0	0.789591	27	28	1.053333	1.046667	2	day2	1
BM2_660	0	1	2	2	72	352	CheesyDoritos.bmp	Goldfish.bmp	22	21	0	i	3	1	1.142356	23	22	1.073333	1.08	2	day2	1
BM2_661	0	2	2	1	1	0	Toberlorone.bmp	Oreos.bmp	14	13	0	i	2	1	0.761748	28	29	1.506667	1.48	2	day2	1
BM2_661	0	2	2	1	2	10	Cheezits.bmp	Goldfish.bmp	14	13	0	u	2	0	0.645337	24	27	1.973333	1.546667	2	day2	1
BM2_661	0	2	2	1	3	13	Cheezits.bmp	Oreos.bmp	14	13	0	u	2	0	0.725362	24	29	1.973333	1.48	2	day2	1
BM2_661	0	2	2	1	4	16	Ghiradelli_milk.bmp	Granolabar.bmp	22	21	0	i	3	1	0.597129	3	6	2.56	2.5	2	day2	1
BM2_661	0	2	2	1	5	20	Cheezits.bmp	SourSkittles.bmp	14	13	0	u	2	0	0.689815	24	26	1.973333	1.726667	2	day2	1
BM2_661	0	2	2	1	6	24	Snickers.bmp	Laysclassic.bmp	12	11	0	i	1	1	0.581874	17	20	1.986667	1.98	2	day2	1
BM2_661	0	2	2	1	7	28	PeanutMMs.bmp	Reeses.bmp	23	24	1	u	4	1	0.698617	12	10	2.473333	2.48	2	day2	1
BM2_661	0	2	2	1	8	32	FigNewton_small.bmp	Granolabar.bmp	22	21	0	u	3	0	0.687363	9	6	2.486667	2.5	2	day2	1
BM2_661	0	2	2	1	9	38	PopTartsCinnamon.bmp	Nutterbutter.bmp	11	12	1	u	1	1	0.830146	22	21	1.98	1.98	2	day2	1
BM2_661	0	2	2	1	10	42	Laysclassic.bmp	SnoBall.bmp	11	12	1	i	1	0	0.554895	20	23	1.98	1.98	2	day2	1
BM2_661	0	2	2	1	11	45	Almondjoy.bmp	AnimalCrackers.bmp	23	24	1	u	4	1	0.617922	13	14	2.46	2.006667	2	day2	1
BM2_661	0	2	2	1	12	48	Skittles.bmp	Milano.bmp	21	22	1	i	3	0	0.785662	5	7	2.506667	2.5	2	day2	1
BM2_661	0	2	2	1	13	52	Dots_one.bmp	Snickers.bmp	11	12	1	u	1	1	0.517695	19	17	1.98	1.986667	2	day2	1
BM2_661	0	2	2	1	14	61	Milano.bmp	Granolabar.bmp	22	21	0	i	3	1	1.044198	7	6	2.5	2.5	2	day2	1
BM2_661	0	2	2	1	15	68	Laysclassic.bmp	Nutterbutter.bmp	11	12	1	i	1	0	0.879984	20	21	1.98	1.98	2	day2	1
BM2_661	0	2	2	1	16	73	Skittles.bmp	FigNewton_small.bmp	21	22	1	i	3	0	0.689745	5	9	2.506667	2.486667	2	day2	1
BM2_661	0	2	2	1	17	77	PopTartsCinnamon.bmp	SnoBall.bmp	11	12	1	i	1	0	0.822481	22	23	1.98	1.98	2	day2	1
BM2_661	0	2	2	1	18	80	SnoBall.bmp	Dots_one.bmp	12	11	0	u	1	0	0.709498	23	19	1.98	1.98	2	day2	1
BM2_661	0	2	2	1	19	84	PopTartsCinnamon.bmp	Snickers.bmp	11	12	1	i	1	0	0.914269	22	17	1.98	1.986667	2	day2	1
BM2_661	0	2	2	1	20	93	Ghiradelli_milk.bmp	Skittles.bmp	22	21	0	u	3	0	0.696765	3	5	2.56	2.506667	2	day2	1
BM2_661	0	2	2	1	21	98	Oreos.bmp	Chocolate_mm.bmp	13	14	1	u	2	1	1.210496	29	30	1.48	1.046667	2	day2	1
BM2_661	0	2	2	1	22	101	Goldfish.bmp	Chocolate_mm.bmp	13	14	1	i	2	0	0.817557	27	30	1.546667	1.046667	2	day2	1
BM2_661	0	2	2	1	23	104	PopTartsStrawberry.bmp	Ghiradelli_milk.bmp	21	22	1	u	3	1	0.833285	8	3	2.493333	2.56	2	day2	1
BM2_661	0	2	2	1	24	108	AnimalCrackers.bmp	Keeblerfudgestripes.bmp	24	23	0	u	4	0	0.941317	14	15	2.006667	1.986667	2	day2	1
BM2_661	0	2	2	1	25	111	Nutterbutter.bmp	Dots_one.bmp	12	11	0	i	1	1	1.381071	21	19	1.98	1.98	2	day2	1
BM2_661	0	2	2	1	26	114	FigNewton_small.bmp	PopTartsStrawberry.bmp	22	21	0	i	3	1	0.948811	9	8	2.486667	2.493333	2	day2	1
BM2_661	0	2	2	1	27	123	PopTartsStrawberry.bmp	Milano.bmp	21	22	1	u	3	1	0.826571	8	7	2.493333	2.5	2	day2	1
BM2_661	0	2	2	1	28	126	Reeses.bmp	Keeblerfudgestripes.bmp	24	23	0	u	4	0	1.354331	10	15	2.48	1.986667	2	day2	1
BM2_661	0	2	2	1	29	130	AnimalCrackers.bmp	PeanutMMs.bmp	24	23	0	u	4	0	0.926288	14	12	2.006667	2.473333	2	day2	1
BM2_661	0	2	2	1	30	135	SourSkittles.bmp	Toberlorone.bmp	13	14	1	i	2	0	0.896135	26	28	1.726667	1.506667	2	day2	1
BM2_661	0	2	2	1	31	148	Almondjoy.bmp	Milkduds.bmp	23	24	1	u	4	1	0.81138	13	16	2.46	1.986667	2	day2	1
BM2_661	0	2	2	1	32	151	Milkduds.bmp	Keeblerfudgestripes.bmp	24	23	0	u	4	0	0.954405	16	15	1.986667	1.986667	2	day2	1
BM2_661	0	2	2	1	33	154	Reeses.bmp	Almondjoy.bmp	24	23	0	i	4	1	0.802135	10	13	2.48	2.46	2	day2	1
BM2_661	0	2	2	1	34	160	SourSkittles.bmp	Chocolate_mm.bmp	13	14	1	i	2	0	0.95294	26	30	1.726667	1.046667	2	day2	1
BM2_661	0	2	2	1	35	164	PeanutMMs.bmp	Milkduds.bmp	23	24	1	u	4	1	0.957688	12	16	2.473333	1.986667	2	day2	1
BM2_661	0	2	2	1	36	168	Toberlorone.bmp	Goldfish.bmp	14	13	0	i	2	1	0.769674	28	27	1.506667	1.546667	2	day2	1
BM2_661	0	2	2	2	37	171	Oreos.bmp	Toberlorone.bmp	13	14	1	u	2	1	1.065444	29	28	1.48	1.506667	2	day2	1
BM2_661	0	2	2	2	38	177	Keeblerfudgestripes.bmp	Milkduds.bmp	23	24	1	i	4	0	1.408201	15	16	1.986667	1.986667	2	day2	1
BM2_661	0	2	2	2	39	181	Reeses.bmp	Keeblerfudgestripes.bmp	24	23	0	u	4	0	1.028942	10	15	2.48	1.986667	2	day2	1
BM2_661	0	2	2	2	40	187	Chocolate_mm.bmp	Oreos.bmp	14	13	0	u	2	0	0.891695	30	29	1.046667	1.48	2	day2	1
BM2_661	0	2	2	2	41	192	FigNewton_small.bmp	Granolabar.bmp	22	21	0	u	3	0	0.84477	9	6	2.486667	2.5	2	day2	1
BM2_661	0	2	2	2	42	202	Toberlorone.bmp	Goldfish.bmp	14	13	0	i	2	1	0.776201	28	27	1.506667	1.546667	2	day2	1
BM2_661	0	2	2	2	43	212	Skittles.bmp	Milano.bmp	21	22	1	i	3	0	1.387805	5	7	2.506667	2.5	2	day2	1
BM2_661	0	2	2	2	44	220	Ghiradelli_milk.bmp	PopTartsStrawberry.bmp	22	21	0	i	3	1	1.333286	3	8	2.56	2.493333	2	day2	1
BM2_661	0	2	2	2	45	224	Toberlorone.bmp	SourSkittles.bmp	14	13	0	u	2	0	1.40931	28	26	1.506667	1.726667	2	day2	1
BM2_661	0	2	2	2	46	227	Milkduds.bmp	PeanutMMs.bmp	24	23	0	i	4	1	1.009057	16	12	1.986667	2.473333	2	day2	1
BM2_661	0	2	2	2	47	230	PeanutMMs.bmp	AnimalCrackers.bmp	23	24	1	x	4	NA	NA	12	14	2.473333	2.006667	2	day2	1
BM2_661	0	2	2	2	48	233	PopTartsCinnamon.bmp	SnoBall.bmp	11	12	1	u	1	1	1.103812	22	23	1.98	1.98	2	day2	1
BM2_661	0	2	2	2	49	241	PopTartsStrawberry.bmp	FigNewton_small.bmp	21	22	1	i	3	0	1.000534	8	9	2.493333	2.486667	2	day2	1
BM2_661	0	2	2	2	50	244	Nutterbutter.bmp	PopTartsCinnamon.bmp	12	11	0	u	1	0	0.736387	21	22	1.98	1.98	2	day2	1
BM2_661	0	2	2	2	51	252	Snickers.bmp	Laysclassic.bmp	12	11	0	u	1	0	1.073112	17	20	1.986667	1.98	2	day2	1
BM2_661	0	2	2	2	52	259	Milano.bmp	Granolabar.bmp	22	21	0	u	3	0	0.909606	7	6	2.5	2.5	2	day2	1
BM2_661	0	2	2	2	53	262	AnimalCrackers.bmp	Keeblerfudgestripes.bmp	24	23	0	i	4	1	0.916593	14	15	2.006667	1.986667	2	day2	1
BM2_661	0	2	2	2	54	269	Laysclassic.bmp	Nutterbutter.bmp	11	12	1	i	1	0	0.776406	20	21	1.98	1.98	2	day2	1
BM2_661	0	2	2	2	55	273	SourSkittles.bmp	Chocolate_mm.bmp	13	14	1	i	2	0	0.717181	26	30	1.726667	1.046667	2	day2	1
BM2_661	0	2	2	2	56	282	Dots_one.bmp	SnoBall.bmp	11	12	1	i	1	0	0.963685	19	23	1.98	1.98	2	day2	1
BM2_661	0	2	2	2	57	286	Skittles.bmp	FigNewton_small.bmp	21	22	1	i	3	0	0.879628	5	9	2.506667	2.486667	2	day2	1
BM2_661	0	2	2	2	58	300	Ghiradelli_milk.bmp	Granolabar.bmp	22	21	0	u	3	0	1.463971	3	6	2.56	2.5	2	day2	1
BM2_661	0	2	2	2	59	303	Almondjoy.bmp	Milkduds.bmp	23	24	1	u	4	1	0.975004	13	16	2.46	1.986667	2	day2	1
BM2_661	0	2	2	2	60	306	Almondjoy.bmp	Reeses.bmp	23	24	1	u	4	1	0.950768	13	10	2.46	2.48	2	day2	1
BM2_661	0	2	2	2	61	309	Goldfish.bmp	Chocolate_mm.bmp	13	14	1	i	2	0	0.749774	27	30	1.546667	1.046667	2	day2	1
BM2_661	0	2	2	2	62	312	Nutterbutter.bmp	Dots_one.bmp	12	11	0	u	1	0	0.885398	21	19	1.98	1.98	2	day2	1
BM2_661	0	2	2	2	63	315	Milano.bmp	PopTartsStrawberry.bmp	22	21	0	u	3	0	1.077225	7	8	2.5	2.493333	2	day2	1
BM2_661	0	2	2	2	64	318	Cheezits.bmp	SourSkittles.bmp	14	13	0	u	2	0	1.052278	24	26	1.973333	1.726667	2	day2	1
BM2_661	0	2	2	2	65	324	Snickers.bmp	PopTartsCinnamon.bmp	12	11	0	i	1	1	0.82705	17	22	1.986667	1.98	2	day2	1
BM2_661	0	2	2	2	66	328	Skittles.bmp	Ghiradelli_milk.bmp	21	22	1	i	3	0	0.91979	5	3	2.506667	2.56	2	day2	1
BM2_661	0	2	2	2	67	333	Oreos.bmp	Cheezits.bmp	13	14	1	u	2	1	0.961558	29	24	1.48	1.973333	2	day2	1
BM2_661	0	2	2	2	68	339	Almondjoy.bmp	AnimalCrackers.bmp	23	24	1	u	4	1	0.728305	13	14	2.46	2.006667	2	day2	1
BM2_661	0	2	2	2	69	342	Goldfish.bmp	Cheezits.bmp	13	14	1	i	2	0	0.759296	27	24	1.546667	1.973333	2	day2	1
BM2_661	0	2	2	2	70	345	Snickers.bmp	Dots_one.bmp	12	11	0	u	1	0	0.775074	17	19	1.986667	1.98	2	day2	1
BM2_661	0	2	2	2	71	349	Reeses.bmp	PeanutMMs.bmp	24	23	0	i	4	1	1.027831	10	12	2.48	2.473333	2	day2	1
BM2_661	0	2	2	2	72	352	Laysclassic.bmp	SnoBall.bmp	11	12	1	i	1	0	0.770853	20	23	1.98	1.98	2	day2	1
BM2_662	0	1	1	1	1	0	Nutterbutter.bmp	Cheetos.bmp	21	22	1	u	3	1	0.919251	21	22	0.993333	0.973333	2	day2	1
BM2_662	0	1	1	1	2	10	Cheezits.bmp	ChipsAhoy_small.bmp	23	24	1	u	4	1	0.754829	24	26	0.906667	0.88	2	day2	1
BM2_662	0	1	1	1	3	13	FrootLoops.bmp	RitzBitz2.bmp	24	23	0	i	4	1	0.923264	29	30	0.76	0.673333	2	day2	1
BM2_662	0	1	1	1	4	16	Oreos.bmp	Ghiradelli_milk.bmp	12	11	0	i	1	1	0.706304	5	3	1.526667	1.68	2	day2	1
BM2_662	0	1	1	1	5	20	3Musketeers.bmp	Twix.bmp	12	11	0	i	1	1	1.175068	6	9	1.506667	1.226667	2	day2	1
BM2_662	0	1	1	1	6	24	Nutterbutter.bmp	Reeses.bmp	21	22	1	u	3	1	0.875051	21	20	0.993333	1.006667	2	day2	1
BM2_662	0	1	1	1	7	28	Keeblerfudgestripes.bmp	Oreos.bmp	11	12	1	i	1	0	0.671823	7	5	1.32	1.526667	2	day2	1
BM2_662	0	1	1	1	8	32	Fritos.bmp	Ghiradelli_milk.bmp	12	11	0	i	1	1	0.644616	8	3	1.293333	1.68	2	day2	1
BM2_662	0	1	1	1	9	38	Twix.bmp	Oreos.bmp	11	12	1	i	1	0	0.770379	9	5	1.226667	1.526667	2	day2	1
BM2_662	0	1	1	1	10	42	Butterfinger.bmp	Reeses.bmp	21	22	1	u	3	1	0.728127	23	20	0.926667	1.006667	2	day2	1
BM2_662	0	1	1	1	11	45	Doritosranch.bmp	Cheezits.bmp	24	23	0	i	4	1	0.79116	27	24	0.88	0.906667	2	day2	1
BM2_662	0	1	1	1	12	48	KitKat_small.bmp	Whatchamacallit.bmp	13	14	1	u	2	1	0.838902	10	13	1.166667	1.08	2	day2	1
BM2_662	0	1	1	1	13	52	Hersheymilk_several.bmp	Nutterbutter.bmp	22	21	0	i	3	1	0.610911	19	21	1.013333	0.993333	2	day2	1
BM2_662	0	1	1	1	14	61	ChipsAhoy_small.bmp	RitzBitz2.bmp	24	23	0	i	4	1	0.961449	26	30	0.88	0.673333	2	day2	1
BM2_662	0	1	1	1	15	68	Hersheykisses.bmp	ChipsAhoy_small.bmp	23	24	1	u	4	1	0.797238	28	26	0.766667	0.88	2	day2	1
BM2_662	0	1	1	1	16	73	Cheezits.bmp	FrootLoops.bmp	23	24	1	u	4	1	0.606966	24	29	0.906667	0.76	2	day2	1
BM2_662	0	1	1	1	17	77	KitKat_small.bmp	PopTartsCinnamon.bmp	13	14	1	u	2	1	0.874998	10	15	1.166667	1.046667	2	day2	1
BM2_662	0	1	1	1	18	80	Whatchamacallit.bmp	Milkduds.bmp	14	13	0	u	2	0	1.00278	13	16	1.08	1.02	2	day2	1
BM2_662	0	1	1	1	19	84	Hersheymilk_several.bmp	PringlesRed.bmp	22	21	0	i	3	1	0.815519	19	17	1.013333	1.02	2	day2	1
BM2_662	0	1	1	1	20	93	Keeblerfudgestripes.bmp	3Musketeers.bmp	11	12	1	u	1	1	0.629985	7	6	1.32	1.506667	2	day2	1
BM2_662	0	1	1	1	21	98	PopTartsCinnamon.bmp	MilkyWay.bmp	14	13	0	i	2	1	0.775798	15	14	1.046667	1.06	2	day2	1
BM2_662	0	1	1	1	22	101	MilkyWay.bmp	100grand_small.bmp	13	14	1	i	2	0	0.862816	14	12	1.06	1.093333	2	day2	1
BM2_662	0	1	1	1	23	104	PringlesRed.bmp	Cheetos.bmp	21	22	1	u	3	1	0.726589	17	22	1.02	0.973333	2	day2	1
BM2_662	0	1	1	1	24	108	Doritosranch.bmp	RitzBitz2.bmp	24	23	0	i	4	1	0.835277	27	30	0.88	0.673333	2	day2	1
BM2_662	0	1	1	1	25	111	Milkduds.bmp	100grand_small.bmp	13	14	1	i	2	0	0.690337	16	12	1.02	1.093333	2	day2	1
BM2_662	0	1	1	1	26	114	Cheetos.bmp	Butterfinger.bmp	22	21	0	i	3	1	0.714077	22	23	0.973333	0.926667	2	day2	1
BM2_662	0	1	1	1	27	123	Doritosranch.bmp	Hersheykisses.bmp	24	23	0	i	4	1	0.671802	27	28	0.88	0.766667	2	day2	1
BM2_662	0	1	1	1	28	126	Reeses.bmp	PringlesRed.bmp	22	21	0	i	3	1	0.615614	20	17	1.006667	1.02	2	day2	1
BM2_662	0	1	1	1	29	130	Hersheymilk_several.bmp	Butterfinger.bmp	22	21	0	i	3	1	0.595677	19	23	1.013333	0.926667	2	day2	1
BM2_662	0	1	1	1	30	135	PopTartsCinnamon.bmp	Milkduds.bmp	14	13	0	i	2	1	0.853432	15	16	1.046667	1.02	2	day2	1
BM2_662	0	1	1	1	31	148	Fritos.bmp	Twix.bmp	12	11	0	i	1	1	0.656682	8	9	1.293333	1.226667	2	day2	1
BM2_662	0	1	1	1	32	151	Hersheykisses.bmp	FrootLoops.bmp	23	24	1	u	4	1	0.591708	28	29	0.766667	0.76	2	day2	1
BM2_662	0	1	1	1	33	154	Whatchamacallit.bmp	MilkyWay.bmp	14	13	0	i	2	1	1.039437	13	14	1.08	1.06	2	day2	1
BM2_662	0	1	1	1	34	160	Keeblerfudgestripes.bmp	Fritos.bmp	11	12	1	u	1	1	0.702181	7	8	1.32	1.293333	2	day2	1
BM2_662	0	1	1	1	35	164	Ghiradelli_milk.bmp	3Musketeers.bmp	11	12	1	u	1	1	0.610897	3	6	1.68	1.506667	2	day2	1
BM2_662	0	1	1	1	36	168	KitKat_small.bmp	100grand_small.bmp	13	14	1	i	2	0	0.982984	10	12	1.166667	1.093333	2	day2	1
BM2_662	0	1	1	2	37	171	Butterfinger.bmp	Reeses.bmp	21	22	1	u	3	1	0.73474	23	20	0.926667	1.006667	2	day2	1
BM2_662	0	1	1	2	38	177	Butterfinger.bmp	Cheetos.bmp	21	22	1	u	3	1	0.573514	23	22	0.926667	0.973333	2	day2	1
BM2_662	0	1	1	2	39	181	Keeblerfudgestripes.bmp	Fritos.bmp	11	12	1	u	1	1	0.594228	7	8	1.32	1.293333	2	day2	1
BM2_662	0	1	1	2	40	187	Reeses.bmp	Nutterbutter.bmp	22	21	0	i	3	1	0.736925	20	21	1.006667	0.993333	2	day2	1
BM2_662	0	1	1	2	41	192	Reeses.bmp	PringlesRed.bmp	22	21	0	i	3	1	0.634767	20	17	1.006667	1.02	2	day2	1
BM2_662	0	1	1	2	42	202	Hersheykisses.bmp	Doritosranch.bmp	23	24	1	u	4	1	0.613548	28	27	0.766667	0.88	2	day2	1
BM2_662	0	1	1	2	43	212	MilkyWay.bmp	PopTartsCinnamon.bmp	13	14	1	x	2	NA	NA	14	15	1.06	1.046667	2	day2	1
BM2_662	0	1	1	2	44	220	100grand_small.bmp	KitKat_small.bmp	14	13	0	i	2	1	0.610619	12	10	1.093333	1.166667	2	day2	1
BM2_662	0	1	1	2	45	224	Nutterbutter.bmp	Cheetos.bmp	21	22	1	u	3	1	0.494663	21	22	0.993333	0.973333	2	day2	1
BM2_662	0	1	1	2	46	227	PringlesRed.bmp	Hersheymilk_several.bmp	21	22	1	u	3	1	0.558347	17	19	1.02	1.013333	2	day2	1
BM2_662	0	1	1	2	47	230	KitKat_small.bmp	PopTartsCinnamon.bmp	13	14	1	u	2	1	0.885407	10	15	1.166667	1.046667	2	day2	1
BM2_662	0	1	1	2	48	233	Cheezits.bmp	ChipsAhoy_small.bmp	23	24	1	u	4	1	0.621162	24	26	0.906667	0.88	2	day2	1
BM2_662	0	1	1	2	49	241	PringlesRed.bmp	Cheetos.bmp	21	22	1	u	3	1	0.597961	17	22	1.02	0.973333	2	day2	1
BM2_662	0	1	1	2	50	244	Hersheykisses.bmp	FrootLoops.bmp	23	24	1	u	4	1	0.533693	28	29	0.766667	0.76	2	day2	1
BM2_662	0	1	1	2	51	252	3Musketeers.bmp	Keeblerfudgestripes.bmp	12	11	0	i	1	1	0.662489	6	7	1.506667	1.32	2	day2	1
BM2_662	0	1	1	2	52	259	Doritosranch.bmp	RitzBitz2.bmp	24	23	0	i	4	1	0.954954	27	30	0.88	0.673333	2	day2	1
BM2_662	0	1	1	2	53	262	Milkduds.bmp	Whatchamacallit.bmp	13	14	1	i	2	0	1.041993	16	13	1.02	1.08	2	day2	1
BM2_662	0	1	1	2	54	269	Fritos.bmp	Ghiradelli_milk.bmp	12	11	0	i	1	1	0.565813	8	3	1.293333	1.68	2	day2	1
BM2_662	0	1	1	2	55	273	KitKat_small.bmp	Whatchamacallit.bmp	13	14	1	u	2	1	0.68251	10	13	1.166667	1.08	2	day2	1
BM2_662	0	1	1	2	56	282	FrootLoops.bmp	Cheezits.bmp	24	23	0	i	4	1	0.625028	29	24	0.76	0.906667	2	day2	1
BM2_662	0	1	1	2	57	286	Fritos.bmp	Twix.bmp	12	11	0	u	1	0	1.069075	8	9	1.293333	1.226667	2	day2	1
BM2_662	0	1	1	2	58	300	Keeblerfudgestripes.bmp	Oreos.bmp	11	12	1	u	1	1	0.901346	7	5	1.32	1.526667	2	day2	1
BM2_662	0	1	1	2	59	303	Milkduds.bmp	100grand_small.bmp	13	14	1	i	2	0	0.668382	16	12	1.02	1.093333	2	day2	1
BM2_662	0	1	1	2	60	306	Whatchamacallit.bmp	MilkyWay.bmp	14	13	0	u	2	0	1.036118	13	14	1.08	1.06	2	day2	1
BM2_662	0	1	1	2	61	309	ChipsAhoy_small.bmp	Hersheykisses.bmp	24	23	0	i	4	1	0.611165	26	28	0.88	0.766667	2	day2	1
BM2_662	0	1	1	2	62	312	100grand_small.bmp	MilkyWay.bmp	14	13	0	u	2	0	0.690876	12	14	1.093333	1.06	2	day2	1
BM2_662	0	1	1	2	63	315	Hersheymilk_several.bmp	Nutterbutter.bmp	22	21	0	i	3	1	0.626566	19	21	1.013333	0.993333	2	day2	1
BM2_662	0	1	1	2	64	318	PopTartsCinnamon.bmp	Milkduds.bmp	14	13	0	i	2	1	1.025657	15	16	1.046667	1.02	2	day2	1
BM2_662	0	1	1	2	65	324	RitzBitz2.bmp	FrootLoops.bmp	23	24	1	u	4	1	0.792359	30	29	0.673333	0.76	2	day2	1
BM2_662	0	1	1	2	66	328	Hersheymilk_several.bmp	Butterfinger.bmp	22	21	0	i	3	1	0.589143	19	23	1.013333	0.926667	2	day2	1
BM2_662	0	1	1	2	67	333	Oreos.bmp	Twix.bmp	12	11	0	u	1	0	0.678919	5	9	1.526667	1.226667	2	day2	1
BM2_662	0	1	1	2	68	339	ChipsAhoy_small.bmp	RitzBitz2.bmp	24	23	0	i	4	1	0.581694	26	30	0.88	0.673333	2	day2	1
BM2_662	0	1	1	2	69	342	Ghiradelli_milk.bmp	3Musketeers.bmp	11	12	1	u	1	1	0.708733	3	6	1.68	1.506667	2	day2	1
BM2_662	0	1	1	2	70	345	Doritosranch.bmp	Cheezits.bmp	24	23	0	i	4	1	0.90719	27	24	0.88	0.906667	2	day2	1
BM2_662	0	1	1	2	71	349	3Musketeers.bmp	Twix.bmp	12	11	0	u	1	0	0.817151	6	9	1.506667	1.226667	2	day2	1
BM2_662	0	1	1	2	72	352	Ghiradelli_milk.bmp	Oreos.bmp	11	12	1	u	1	1	0.552246	3	5	1.68	1.526667	2	day2	1
BM2_663	0	2	1	1	1	0	Nutterbutter.bmp	Toberlorone.bmp	23	24	1	u	4	1	0.984427	10	13	1.766667	1.733333	2	day2	1
BM2_663	0	2	1	1	2	9	Reeses.bmp	Goldfish.bmp	22	21	0	u	3	0	1.023838	5	9	2	1.766667	2	day2	1
BM2_663	0	2	1	1	3	12	Almondjoy.bmp	PringlesRed.bmp	13	14	1	i	2	0	0.726853	30	27	1.113333	1.36	2	day2	1
BM2_663	0	2	1	1	4	17	Hersheykisses.bmp	Ghiradelli_milk_Almonds.bmp	12	11	0	u	1	0	1.31264	20	17	1.553333	1.68	2	day2	1
BM2_663	0	2	1	1	5	26	Almondjoy.bmp	MilkyWay.bmp	13	14	1	x	2	NA	NA	30	26	1.113333	1.406667	2	day2	1
BM2_663	0	2	1	1	6	32	FamousAmos_small.bmp	Fritos.bmp	11	12	1	u	1	1	0.653888	23	19	1.426667	1.566667	2	day2	1
BM2_663	0	2	1	1	7	35	Fritos.bmp	Ghiradelli_milk_Almonds.bmp	12	11	0	i	1	1	0.93293	19	17	1.566667	1.68	2	day2	1
BM2_663	0	2	1	1	8	48	FamousAmos_small.bmp	Hersheykisses.bmp	11	12	1	i	1	0	0.840155	23	20	1.426667	1.553333	2	day2	1
BM2_663	0	2	1	1	9	58	Laysclassic.bmp	Goldfish.bmp	22	21	0	u	3	0	0.667699	8	9	1.773333	1.766667	2	day2	1
BM2_663	0	2	1	1	10	63	Oreos.bmp	Nutterbutter.bmp	24	23	0	u	4	0	0.660749	15	10	1.706667	1.766667	2	day2	1
BM2_663	0	2	1	1	11	66	Almondjoy.bmp	ChipsAhoy_small.bmp	13	14	1	i	2	0	0.755612	30	29	1.113333	1.126667	2	day2	1
BM2_663	0	2	1	1	12	69	Hersheymilk_several.bmp	Goldfish.bmp	22	21	0	i	3	1	0.884249	6	9	1.993333	1.766667	2	day2	1
BM2_663	0	2	1	1	13	72	Oreos.bmp	Doritosranch.bmp	24	23	0	u	4	0	0.995234	15	14	1.706667	1.72	2	day2	1
BM2_663	0	2	1	1	14	82	PringlesRed.bmp	Cheetos.bmp	14	13	0	i	2	1	0.758806	27	24	1.36	1.42	2	day2	1
BM2_663	0	2	1	1	15	85	RitzBitz2.bmp	Reeses.bmp	21	22	1	i	3	0	1.053827	7	5	1.826667	2	2	day2	1
BM2_663	0	2	1	1	16	95	Butterfinger.bmp	Twix.bmp	12	11	0	i	1	1	1.153319	22	21	1.466667	1.526667	2	day2	1
BM2_663	0	2	1	1	17	98	PringlesRed.bmp	CheesyDoritos.bmp	14	13	0	u	2	0	0.849054	27	28	1.36	1.286667	2	day2	1
BM2_663	0	2	1	1	18	101	Snickers.bmp	Toberlorone.bmp	23	24	1	u	4	1	1.080118	16	13	1.693333	1.733333	2	day2	1
BM2_663	0	2	1	1	19	105	Nutterbutter.bmp	Keeblerfudgestripes.bmp	23	24	1	u	4	1	0.852365	10	12	1.766667	1.733333	2	day2	1
BM2_663	0	2	1	1	20	109	Doritosranch.bmp	Toberlorone.bmp	23	24	1	u	4	1	1.057556	14	13	1.72	1.733333	2	day2	1
BM2_663	0	2	1	1	21	113	Butterfinger.bmp	Ghiradelli_milk_Almonds.bmp	12	11	0	i	1	1	0.877589	22	17	1.466667	1.68	2	day2	1
BM2_663	0	2	1	1	22	119	Keeblerfudgestripes.bmp	Doritosranch.bmp	24	23	0	i	4	1	0.948347	12	14	1.733333	1.72	2	day2	1
BM2_663	0	2	1	1	23	123	CheesyDoritos.bmp	ChipsAhoy_small.bmp	13	14	1	i	2	0	0.929141	28	29	1.286667	1.126667	2	day2	1
BM2_663	0	2	1	1	24	132	Cheezits.bmp	Hersheymilk_several.bmp	21	22	1	u	3	1	0.551638	3	6	2.353333	1.993333	2	day2	1
BM2_663	0	2	1	1	25	140	Reeses.bmp	Cheezits.bmp	22	21	0	i	3	1	0.896352	5	3	2	2.353333	2	day2	1
BM2_663	0	2	1	1	26	144	Cheezits.bmp	Laysclassic.bmp	21	22	1	i	3	0	1.133207	3	8	2.353333	1.773333	2	day2	1
BM2_663	0	2	1	1	27	147	Twix.bmp	Fritos.bmp	11	12	1	u	1	1	1.02815	21	19	1.526667	1.566667	2	day2	1
BM2_663	0	2	1	1	28	151	MilkyWay.bmp	CheesyDoritos.bmp	14	13	0	x	2	NA	NA	26	28	1.406667	1.286667	2	day2	1
BM2_663	0	2	1	1	29	154	Oreos.bmp	Snickers.bmp	24	23	0	u	4	0	1.056598	15	16	1.706667	1.693333	2	day2	1
BM2_663	0	2	1	1	30	158	Hersheymilk_several.bmp	RitzBitz2.bmp	22	21	0	i	3	1	0.708709	6	7	1.993333	1.826667	2	day2	1
BM2_663	0	2	1	1	31	161	Laysclassic.bmp	RitzBitz2.bmp	22	21	0	u	3	0	0.619502	8	7	1.773333	1.826667	2	day2	1
BM2_663	0	2	1	1	32	167	Twix.bmp	Hersheykisses.bmp	11	12	1	u	1	1	0.99523	21	20	1.526667	1.553333	2	day2	1
BM2_663	0	2	1	1	33	170	FamousAmos_small.bmp	Butterfinger.bmp	11	12	1	u	1	1	0.642975	23	22	1.426667	1.466667	2	day2	1
BM2_663	0	2	1	1	34	174	MilkyWay.bmp	Cheetos.bmp	14	13	0	i	2	1	1.02301	26	24	1.406667	1.42	2	day2	1
BM2_663	0	2	1	1	35	179	Snickers.bmp	Keeblerfudgestripes.bmp	23	24	1	u	4	1	0.776717	16	12	1.693333	1.733333	2	day2	1
BM2_663	0	2	1	1	36	182	Cheetos.bmp	ChipsAhoy_small.bmp	13	14	1	u	2	1	0.656513	24	29	1.42	1.126667	2	day2	1
BM2_663	0	2	1	2	37	185	Laysclassic.bmp	Goldfish.bmp	22	21	0	u	3	0	0.783497	8	9	1.773333	1.766667	2	day2	1
BM2_663	0	2	1	2	38	188	Cheetos.bmp	PringlesRed.bmp	13	14	1	u	2	1	1.047258	24	27	1.42	1.36	2	day2	1
BM2_663	0	2	1	2	39	191	RitzBitz2.bmp	Laysclassic.bmp	21	22	1	u	3	1	0.982281	7	8	1.826667	1.773333	2	day2	1
BM2_663	0	2	1	2	40	195	Cheezits.bmp	Laysclassic.bmp	21	22	1	u	3	1	0.635059	3	8	2.353333	1.773333	2	day2	1
BM2_663	0	2	1	2	41	200	Twix.bmp	Butterfinger.bmp	11	12	1	u	1	1	0.907627	21	22	1.526667	1.466667	2	day2	1
BM2_663	0	2	1	2	42	204	Snickers.bmp	Oreos.bmp	23	24	1	u	4	1	0.801557	16	15	1.693333	1.706667	2	day2	1
BM2_663	0	2	1	2	43	208	Nutterbutter.bmp	Keeblerfudgestripes.bmp	23	24	1	u	4	1	0.805607	10	12	1.766667	1.733333	2	day2	1
BM2_663	0	2	1	2	44	212	Oreos.bmp	Doritosranch.bmp	24	23	0	i	4	1	0.786323	15	14	1.706667	1.72	2	day2	1
BM2_663	0	2	1	2	45	218	Almondjoy.bmp	ChipsAhoy_small.bmp	13	14	1	u	2	1	1.145104	30	29	1.113333	1.126667	2	day2	1
BM2_663	0	2	1	2	46	224	FamousAmos_small.bmp	Butterfinger.bmp	11	12	1	u	1	1	0.615802	23	22	1.426667	1.466667	2	day2	1
BM2_663	0	2	1	2	47	229	FamousAmos_small.bmp	Fritos.bmp	11	12	1	u	1	1	0.841585	23	19	1.426667	1.566667	2	day2	1
BM2_663	0	2	1	2	48	236	Ghiradelli_milk_Almonds.bmp	Fritos.bmp	11	12	1	u	1	1	0.621436	17	19	1.68	1.566667	2	day2	1
BM2_663	0	2	1	2	49	240	Keeblerfudgestripes.bmp	Doritosranch.bmp	24	23	0	i	4	1	0.69009	12	14	1.733333	1.72	2	day2	1
BM2_663	0	2	1	2	50	250	Hersheykisses.bmp	FamousAmos_small.bmp	12	11	0	u	1	0	1.029677	20	23	1.553333	1.426667	2	day2	1
BM2_663	0	2	1	2	51	260	Hersheymilk_several.bmp	Cheezits.bmp	22	21	0	i	3	1	0.825194	6	3	1.993333	2.353333	2	day2	1
BM2_663	0	2	1	2	52	264	MilkyWay.bmp	Cheetos.bmp	14	13	0	u	2	0	1.437234	26	24	1.406667	1.42	2	day2	1
BM2_663	0	2	1	2	53	271	PringlesRed.bmp	Almondjoy.bmp	14	13	0	u	2	0	1.041722	27	30	1.36	1.113333	2	day2	1
BM2_663	0	2	1	2	54	275	MilkyWay.bmp	CheesyDoritos.bmp	14	13	0	i	2	1	0.717739	26	28	1.406667	1.286667	2	day2	1
BM2_663	0	2	1	2	55	279	MilkyWay.bmp	Almondjoy.bmp	14	13	0	i	2	1	0.938464	26	30	1.406667	1.113333	2	day2	1
BM2_663	0	2	1	2	56	283	Hersheykisses.bmp	Ghiradelli_milk_Almonds.bmp	12	11	0	i	1	1	0.959214	20	17	1.553333	1.68	2	day2	1
BM2_663	0	2	1	2	57	286	Cheezits.bmp	Reeses.bmp	21	22	1	u	3	1	0.806226	3	5	2.353333	2	2	day2	1
BM2_663	0	2	1	2	58	289	Toberlorone.bmp	Nutterbutter.bmp	24	23	0	i	4	1	0.926006	13	10	1.733333	1.766667	2	day2	1
BM2_663	0	2	1	2	59	293	Ghiradelli_milk_Almonds.bmp	Butterfinger.bmp	11	12	1	u	1	1	0.650771	17	22	1.68	1.466667	2	day2	1
BM2_663	0	2	1	2	60	296	ChipsAhoy_small.bmp	CheesyDoritos.bmp	14	13	0	i	2	1	0.761798	29	28	1.126667	1.286667	2	day2	1
BM2_663	0	2	1	2	61	299	Nutterbutter.bmp	Oreos.bmp	23	24	1	u	4	1	0.641445	10	15	1.766667	1.706667	2	day2	1
BM2_663	0	2	1	2	62	306	Hersheymilk_several.bmp	Goldfish.bmp	22	21	0	u	3	0	1.077297	6	9	1.993333	1.766667	2	day2	1
BM2_663	0	2	1	2	63	311	Reeses.bmp	RitzBitz2.bmp	22	21	0	u	3	0	0.95104	5	7	2	1.826667	2	day2	1
BM2_663	0	2	1	2	64	317	Doritosranch.bmp	Toberlorone.bmp	23	24	1	u	4	1	0.637816	14	13	1.72	1.733333	2	day2	1
BM2_663	0	2	1	2	65	320	Snickers.bmp	Keeblerfudgestripes.bmp	23	24	1	u	4	1	0.932857	16	12	1.693333	1.733333	2	day2	1
BM2_663	0	2	1	2	66	324	PringlesRed.bmp	CheesyDoritos.bmp	14	13	0	u	2	0	0.961613	27	28	1.36	1.286667	2	day2	1
BM2_663	0	2	1	2	67	327	Goldfish.bmp	Reeses.bmp	21	22	1	i	3	0	0.865349	9	5	1.766667	2	2	day2	1
BM2_663	0	2	1	2	68	330	Hersheymilk_several.bmp	RitzBitz2.bmp	22	21	0	u	3	0	0.824382	6	7	1.993333	1.826667	2	day2	1
BM2_663	0	2	1	2	69	333	Snickers.bmp	Toberlorone.bmp	23	24	1	u	4	1	1.024117	16	13	1.693333	1.733333	2	day2	1
BM2_663	0	2	1	2	70	341	Twix.bmp	Fritos.bmp	11	12	1	u	1	1	1.176891	21	19	1.526667	1.566667	2	day2	1
BM2_663	0	2	1	2	71	344	Hersheykisses.bmp	Twix.bmp	12	11	0	u	1	0	1.304625	20	21	1.553333	1.526667	2	day2	1
BM2_663	0	2	1	2	72	352	ChipsAhoy_small.bmp	Cheetos.bmp	14	13	0	i	2	1	1.201435	29	24	1.126667	1.42	2	day2	1
BM2_664	0	1	2	1	1	0	Reeses.bmp	AnimalCrackers.bmp	12	11	0	i	1	1	0.974337	9	5	2.266667	2.466667	2	day2	1
BM2_664	0	1	2	1	2	10	3Musketeers.bmp	ChipsAhoy_small.bmp	23	24	1	i	4	0	1.138648	29	28	1.78	1.82	2	day2	1
BM2_664	0	1	2	1	3	13	MrGoodbar.bmp	ChipsAhoy_small.bmp	23	24	1	i	4	0	1.353723	27	28	1.96	1.82	2	day2	1
BM2_664	0	1	2	1	4	16	Oreos.bmp	Keeblerfudgestripes.bmp	13	14	1	x	2	NA	NA	12	10	2.233333	2.246667	2	day2	1
BM2_664	0	1	2	1	5	20	Cupcakes.bmp	Nutterbutter.bmp	13	14	1	i	2	0	0.822172	13	16	2.14	2.006667	2	day2	1
BM2_664	0	1	2	1	6	24	KitKat_small.bmp	PringlesRed.bmp	22	21	0	u	3	0	0.690177	21	19	1.993333	2	2	day2	1
BM2_664	0	1	2	1	7	28	Granolabar.bmp	FamousAmos_small.bmp	11	12	1	i	1	0	0.702957	6	7	2.46	2.373333	2	day2	1
BM2_664	0	1	2	1	8	32	TeddyGrahamschocolate.bmp	Doritosranch.bmp	14	13	0	i	2	1	0.755689	14	15	2.033333	2.006667	2	day2	1
BM2_664	0	1	2	1	9	38	Fritos.bmp	Skittles.bmp	21	22	1	u	3	1	0.809488	20	23	1.993333	1.993333	2	day2	1
BM2_664	0	1	2	1	10	42	KitKat_small.bmp	RitzBitz2.bmp	22	21	0	i	3	1	1.263245	21	22	1.993333	1.993333	2	day2	1
BM2_664	0	1	2	1	11	45	Laysclassic.bmp	ChipsAhoy_small.bmp	23	24	1	i	4	0	0.87022	26	28	1.966667	1.82	2	day2	1
BM2_664	0	1	2	1	12	48	Doritosranch.bmp	Keeblerfudgestripes.bmp	13	14	1	i	2	0	0.93395	15	10	2.006667	2.246667	2	day2	1
BM2_664	0	1	2	1	13	52	AnimalCrackers.bmp	PeanutMMs.bmp	11	12	1	u	1	1	0.83405	5	3	2.466667	2.493333	2	day2	1
BM2_664	0	1	2	1	14	61	Streusel.bmp	Fritos.bmp	22	21	0	u	3	0	1.136545	17	20	2.006667	1.993333	2	day2	1
BM2_664	0	1	2	1	15	68	Laysclassic.bmp	Cheetos.bmp	23	24	1	u	4	1	0.812286	26	30	1.966667	1.673333	2	day2	1
BM2_664	0	1	2	1	16	73	KitKat_small.bmp	Fritos.bmp	22	21	0	u	3	0	1.022034	21	20	1.993333	1.993333	2	day2	1
BM2_664	0	1	2	1	17	77	PeanutMMs.bmp	Granolabar.bmp	12	11	0	i	1	1	1.297938	3	6	2.493333	2.46	2	day2	1
BM2_664	0	1	2	1	18	80	Cupcakes.bmp	TeddyGrahamschocolate.bmp	13	14	1	i	2	0	1.049872	13	14	2.14	2.033333	2	day2	1
BM2_664	0	1	2	1	19	84	Reeses.bmp	PopTartsStrawberry.bmp	12	11	0	i	1	1	1.278626	9	8	2.266667	2.36	2	day2	1
BM2_664	0	1	2	1	20	93	Cheetos.bmp	3Musketeers.bmp	24	23	0	u	4	0	0.869128	30	29	1.673333	1.78	2	day2	1
BM2_664	0	1	2	1	21	98	Nutterbutter.bmp	Oreos.bmp	14	13	0	u	2	0	0.982881	16	12	2.006667	2.233333	2	day2	1
BM2_664	0	1	2	1	22	101	PringlesRed.bmp	Streusel.bmp	21	22	1	i	3	0	1.17388	19	17	2	2.006667	2	day2	1
BM2_664	0	1	2	1	23	104	Cupcakes.bmp	Keeblerfudgestripes.bmp	13	14	1	i	2	0	0.749631	13	10	2.14	2.246667	2	day2	1
BM2_664	0	1	2	1	24	108	PeanutMMs.bmp	PopTartsStrawberry.bmp	12	11	0	i	1	1	0.873678	3	8	2.493333	2.36	2	day2	1
BM2_664	0	1	2	1	25	111	3Musketeers.bmp	CheesyDoritos.bmp	23	24	1	i	4	0	0.841312	29	24	1.78	1.986667	2	day2	1
BM2_664	0	1	2	1	26	114	RitzBitz2.bmp	Streusel.bmp	21	22	1	u	3	1	0.977175	22	17	1.993333	2.006667	2	day2	1
BM2_664	0	1	2	1	27	123	TeddyGrahamschocolate.bmp	Oreos.bmp	14	13	0	u	2	0	1.270979	14	12	2.033333	2.233333	2	day2	1
BM2_664	0	1	2	1	28	126	CheesyDoritos.bmp	MrGoodbar.bmp	24	23	0	u	4	0	1.070605	24	27	1.986667	1.96	2	day2	1
BM2_664	0	1	2	1	29	130	Laysclassic.bmp	CheesyDoritos.bmp	23	24	1	u	4	1	1.122685	26	24	1.966667	1.986667	2	day2	1
BM2_664	0	1	2	1	30	135	Cheetos.bmp	MrGoodbar.bmp	24	23	0	u	4	0	1.100463	30	27	1.673333	1.96	2	day2	1
BM2_664	0	1	2	1	31	148	FamousAmos_small.bmp	PopTartsStrawberry.bmp	12	11	0	u	1	0	1.079765	7	8	2.373333	2.36	2	day2	1
BM2_664	0	1	2	1	32	151	AnimalCrackers.bmp	FamousAmos_small.bmp	11	12	1	u	1	1	0.894792	5	7	2.466667	2.373333	2	day2	1
BM2_664	0	1	2	1	33	154	RitzBitz2.bmp	Skittles.bmp	21	22	1	u	3	1	0.934522	22	23	1.993333	1.993333	2	day2	1
BM2_664	0	1	2	1	34	160	Skittles.bmp	PringlesRed.bmp	22	21	0	i	3	1	0.741304	23	19	1.993333	2	2	day2	1
BM2_664	0	1	2	1	35	164	Reeses.bmp	Granolabar.bmp	12	11	0	i	1	1	1.049975	9	6	2.266667	2.46	2	day2	1
BM2_664	0	1	2	1	36	168	Nutterbutter.bmp	Doritosranch.bmp	14	13	0	u	2	0	1.038107	16	15	2.006667	2.006667	2	day2	1
BM2_664	0	1	2	2	37	171	MrGoodbar.bmp	ChipsAhoy_small.bmp	23	24	1	i	4	0	1.069719	27	28	1.96	1.82	2	day2	1
BM2_664	0	1	2	2	38	177	PeanutMMs.bmp	Granolabar.bmp	12	11	0	i	1	1	0.916593	3	6	2.493333	2.46	2	day2	1
BM2_664	0	1	2	2	39	181	KitKat_small.bmp	RitzBitz2.bmp	22	21	0	i	3	1	1.097313	21	22	1.993333	1.993333	2	day2	1
BM2_664	0	1	2	2	40	187	PringlesRed.bmp	Skittles.bmp	21	22	1	u	3	1	1.200113	19	23	2	1.993333	2	day2	1
BM2_664	0	1	2	2	41	192	Keeblerfudgestripes.bmp	Oreos.bmp	14	13	0	u	2	0	0.937084	10	12	2.246667	2.233333	2	day2	1
BM2_664	0	1	2	2	42	202	Granolabar.bmp	FamousAmos_small.bmp	11	12	1	u	1	1	1.292669	6	7	2.46	2.373333	2	day2	1
BM2_664	0	1	2	2	43	212	FamousAmos_small.bmp	PopTartsStrawberry.bmp	12	11	0	u	1	0	0.904202	7	8	2.373333	2.36	2	day2	1
BM2_664	0	1	2	2	44	220	AnimalCrackers.bmp	PeanutMMs.bmp	11	12	1	u	1	1	0.753663	5	3	2.466667	2.493333	2	day2	1
BM2_664	0	1	2	2	45	224	Nutterbutter.bmp	Cupcakes.bmp	14	13	0	u	2	0	0.805734	16	13	2.006667	2.14	2	day2	1
BM2_664	0	1	2	2	46	227	Doritosranch.bmp	Nutterbutter.bmp	13	14	1	u	2	1	0.94139	15	16	2.006667	2.006667	2	day2	1
BM2_664	0	1	2	2	47	230	Doritosranch.bmp	Keeblerfudgestripes.bmp	13	14	1	i	2	0	0.836495	15	10	2.006667	2.246667	2	day2	1
BM2_664	0	1	2	2	48	233	Reeses.bmp	Granolabar.bmp	12	11	0	i	1	1	0.708234	9	6	2.266667	2.46	2	day2	1
BM2_664	0	1	2	2	49	241	CheesyDoritos.bmp	Laysclassic.bmp	24	23	0	i	4	1	1.085029	24	26	1.986667	1.966667	2	day2	1
BM2_664	0	1	2	2	50	244	ChipsAhoy_small.bmp	3Musketeers.bmp	24	23	0	u	4	0	0.772748	28	29	1.82	1.78	2	day2	1
BM2_664	0	1	2	2	51	252	MrGoodbar.bmp	Cheetos.bmp	23	24	1	i	4	0	0.877544	27	30	1.96	1.673333	2	day2	1
BM2_664	0	1	2	2	52	259	CheesyDoritos.bmp	3Musketeers.bmp	24	23	0	u	4	0	0.793293	24	29	1.986667	1.78	2	day2	1
BM2_664	0	1	2	2	53	262	AnimalCrackers.bmp	FamousAmos_small.bmp	11	12	1	u	1	1	0.841072	5	7	2.466667	2.373333	2	day2	1
BM2_664	0	1	2	2	54	269	KitKat_small.bmp	PringlesRed.bmp	22	21	0	u	3	0	1.220822	21	19	1.993333	2	2	day2	1
BM2_664	0	1	2	2	55	273	Laysclassic.bmp	ChipsAhoy_small.bmp	23	24	1	i	4	0	1.385599	26	28	1.966667	1.82	2	day2	1
BM2_664	0	1	2	2	56	282	TeddyGrahamschocolate.bmp	Oreos.bmp	14	13	0	u	2	0	1.176104	14	12	2.033333	2.233333	2	day2	1
BM2_664	0	1	2	2	57	286	Skittles.bmp	RitzBitz2.bmp	22	21	0	i	3	1	0.748098	23	22	1.993333	1.993333	2	day2	1
BM2_664	0	1	2	2	58	300	CheesyDoritos.bmp	MrGoodbar.bmp	24	23	0	u	4	0	1.11643	24	27	1.986667	1.96	2	day2	1
BM2_664	0	1	2	2	59	303	PopTartsStrawberry.bmp	PeanutMMs.bmp	11	12	1	u	1	1	1.139349	8	3	2.36	2.493333	2	day2	1
BM2_664	0	1	2	2	60	306	Nutterbutter.bmp	Oreos.bmp	14	13	0	u	2	0	1.195173	16	12	2.006667	2.233333	2	day2	1
BM2_664	0	1	2	2	61	309	TeddyGrahamschocolate.bmp	Cupcakes.bmp	14	13	0	u	2	0	0.810178	14	13	2.033333	2.14	2	day2	1
BM2_664	0	1	2	2	62	312	AnimalCrackers.bmp	Reeses.bmp	11	12	1	u	1	1	0.633576	5	9	2.466667	2.266667	2	day2	1
BM2_664	0	1	2	2	63	315	TeddyGrahamschocolate.bmp	Doritosranch.bmp	14	13	0	u	2	0	0.561675	14	15	2.033333	2.006667	2	day2	1
BM2_664	0	1	2	2	64	318	Fritos.bmp	Streusel.bmp	21	22	1	i	3	0	1.272699	20	17	1.993333	2.006667	2	day2	1
BM2_664	0	1	2	2	65	324	Fritos.bmp	Skittles.bmp	21	22	1	u	3	1	0.799379	20	23	1.993333	1.993333	2	day2	1
BM2_664	0	1	2	2	66	328	KitKat_small.bmp	Fritos.bmp	22	21	0	i	3	1	1.028226	21	20	1.993333	1.993333	2	day2	1
BM2_664	0	1	2	2	67	333	RitzBitz2.bmp	Streusel.bmp	21	22	1	u	3	1	1.325945	22	17	1.993333	2.006667	2	day2	1
BM2_664	0	1	2	2	68	339	3Musketeers.bmp	Cheetos.bmp	23	24	1	i	4	0	0.796752	29	30	1.78	1.673333	2	day2	1
BM2_664	0	1	2	2	69	342	PringlesRed.bmp	Streusel.bmp	21	22	1	x	3	NA	NA	19	17	2	2.006667	2	day2	1
BM2_664	0	1	2	2	70	345	Cupcakes.bmp	Keeblerfudgestripes.bmp	13	14	1	i	2	0	0.731535	13	10	2.14	2.246667	2	day2	1
BM2_664	0	1	2	2	71	349	PopTartsStrawberry.bmp	Reeses.bmp	11	12	1	u	1	1	0.832275	8	9	2.36	2.266667	2	day2	1
BM2_664	0	1	2	2	72	352	Cheetos.bmp	Laysclassic.bmp	24	23	0	i	4	1	0.807233	30	26	1.673333	1.966667	2	day2	1
BM2_665	0	2	2	1	1	0	Reeses.bmp	Goldfish.bmp	24	23	0	i	4	1	0.980888	16	15	2.026667	2.046667	2	day2	1
BM2_665	0	2	2	1	2	9	CheesyDoritos.bmp	PayDay.bmp	14	13	0	u	2	0	0.916545	28	29	1.513333	1.193333	2	day2	1
BM2_665	0	2	2	1	3	12	FamousAmos_small.bmp	ChipsAhoy_small.bmp	22	21	0	u	3	0	0.867587	9	5	2.453333	2.626667	2	day2	1
BM2_665	0	2	2	1	4	17	TeddyGrahamschocolate.bmp	3Musketeers.bmp	11	12	1	i	1	0	0.821315	20	17	2.006667	2.013333	2	day2	1
BM2_665	0	2	2	1	5	26	Reeses.bmp	Laysclassic.bmp	24	23	0	i	4	1	0.723876	16	12	2.026667	2.413333	2	day2	1
BM2_665	0	2	2	1	6	32	Fritos.bmp	Toberlorone.bmp	14	13	0	u	2	0	0.554622	24	26	1.64	1.566667	2	day2	1
BM2_665	0	2	2	1	7	35	Skittles.bmp	FamousAmos_small.bmp	21	22	1	i	3	0	0.873656	8	9	2.54	2.453333	2	day2	1
BM2_665	0	2	2	1	8	48	Cheetos.bmp	MilkyWay.bmp	23	24	1	u	4	1	0.972902	13	10	2.406667	2.446667	2	day2	1
BM2_665	0	2	2	1	9	58	TeddyGrahamschocolate.bmp	Whatchamacallit.bmp	11	12	1	i	1	0	0.832432	20	23	2.006667	1.646667	2	day2	1
BM2_665	0	2	2	1	10	63	Sourpatch.bmp	TeddyGrahamschocolate.bmp	12	11	0	i	1	1	1.06541	21	20	1.986667	2.006667	2	day2	1
BM2_665	0	2	2	1	11	66	Reeses.bmp	Cheetos.bmp	24	23	0	u	4	0	1.176503	16	13	2.026667	2.406667	2	day2	1
BM2_665	0	2	2	1	12	69	Fritos.bmp	PayDay.bmp	14	13	0	u	2	0	1.088891	24	29	1.64	1.193333	2	day2	1
BM2_665	0	2	2	1	13	72	Cheetos.bmp	PringlesRed.bmp	23	24	1	i	4	0	1.063923	13	14	2.406667	2.093333	2	day2	1
BM2_665	0	2	2	1	14	82	Ghiradelli_milk.bmp	Oreos.bmp	21	22	1	u	3	1	0.859457	6	3	2.613333	2.706667	2	day2	1
BM2_665	0	2	2	1	15	85	PayDay.bmp	Streusel.bmp	13	14	1	i	2	0	1.186534	29	30	1.193333	1.193333	2	day2	1
BM2_665	0	2	2	1	16	95	Sourpatch.bmp	Ghiradelli_milk_Almonds.bmp	12	11	0	i	1	1	1.134071	21	19	1.986667	2.006667	2	day2	1
BM2_665	0	2	2	1	17	98	Whatchamacallit.bmp	SourSkittles.bmp	12	11	0	u	1	0	1.109714	23	22	1.646667	1.7	2	day2	1
BM2_665	0	2	2	1	18	101	Sourpatch.bmp	SourSkittles.bmp	12	11	0	i	1	1	1.236831	21	22	1.986667	1.7	2	day2	1
BM2_665	0	2	2	1	19	105	Goldfish.bmp	MilkyWay.bmp	23	24	1	u	4	1	0.904638	15	10	2.046667	2.446667	2	day2	1
BM2_665	0	2	2	1	20	109	Jollyranchergreen.bmp	Streusel.bmp	13	14	1	i	2	0	0.838289	27	30	1.533333	1.193333	2	day2	1
BM2_665	0	2	2	1	21	113	Fritos.bmp	Jollyranchergreen.bmp	14	13	0	u	2	0	0.898289	24	27	1.64	1.533333	2	day2	1
BM2_665	0	2	2	1	22	119	Skittles.bmp	MrGoodbar.bmp	21	22	1	i	3	0	0.993125	8	7	2.54	2.613333	2	day2	1
BM2_665	0	2	2	1	23	123	MilkyWay.bmp	Laysclassic.bmp	24	23	0	i	4	1	0.901845	10	12	2.446667	2.413333	2	day2	1
BM2_665	0	2	2	1	24	132	3Musketeers.bmp	SourSkittles.bmp	12	11	0	u	1	0	1.012369	17	22	2.013333	1.7	2	day2	1
BM2_665	0	2	2	1	25	140	Skittles.bmp	Oreos.bmp	21	22	1	u	3	1	0.693157	8	3	2.54	2.706667	2	day2	1
BM2_665	0	2	2	1	26	144	Jollyranchergreen.bmp	CheesyDoritos.bmp	13	14	1	i	2	0	0.5206	27	28	1.533333	1.513333	2	day2	1
BM2_665	0	2	2	1	27	147	MrGoodbar.bmp	ChipsAhoy_small.bmp	22	21	0	u	3	0	0.904946	7	5	2.613333	2.626667	2	day2	1
BM2_665	0	2	2	1	28	151	Toberlorone.bmp	Streusel.bmp	13	14	1	u	2	1	0.885717	26	30	1.566667	1.193333	2	day2	1
BM2_665	0	2	2	1	29	154	ChipsAhoy_small.bmp	Oreos.bmp	21	22	1	x	3	NA	NA	5	3	2.626667	2.706667	2	day2	1
BM2_665	0	2	2	1	30	158	PringlesRed.bmp	Laysclassic.bmp	24	23	0	i	4	1	0.53746	14	12	2.093333	2.413333	2	day2	1
BM2_665	0	2	2	1	31	161	Toberlorone.bmp	CheesyDoritos.bmp	13	14	1	i	2	0	0.816114	26	28	1.566667	1.513333	2	day2	1
BM2_665	0	2	2	1	32	167	PringlesRed.bmp	Goldfish.bmp	24	23	0	i	4	1	0.543976	14	15	2.093333	2.046667	2	day2	1
BM2_665	0	2	2	1	33	170	FamousAmos_small.bmp	Ghiradelli_milk.bmp	22	21	0	i	3	1	0.543699	9	6	2.453333	2.613333	2	day2	1
BM2_665	0	2	2	1	34	174	Ghiradelli_milk.bmp	MrGoodbar.bmp	21	22	1	i	3	0	0.891746	6	7	2.613333	2.613333	2	day2	1
BM2_665	0	2	2	1	35	179	Ghiradelli_milk_Almonds.bmp	3Musketeers.bmp	11	12	1	u	1	1	0.949509	19	17	2.006667	2.013333	2	day2	1
BM2_665	0	2	2	1	36	182	Ghiradelli_milk_Almonds.bmp	Whatchamacallit.bmp	11	12	1	u	1	1	0.421225	19	23	2.006667	1.646667	2	day2	1
BM2_665	0	2	2	2	37	185	Jollyranchergreen.bmp	CheesyDoritos.bmp	13	14	1	i	2	0	0.708293	27	28	1.533333	1.513333	2	day2	1
BM2_665	0	2	2	2	38	188	Fritos.bmp	Jollyranchergreen.bmp	14	13	0	u	2	0	0.587915	24	27	1.64	1.533333	2	day2	1
BM2_665	0	2	2	2	39	191	Fritos.bmp	PayDay.bmp	14	13	0	u	2	0	0.546964	24	29	1.64	1.193333	2	day2	1
BM2_665	0	2	2	2	40	195	3Musketeers.bmp	TeddyGrahamschocolate.bmp	12	11	0	u	1	0	0.855799	17	20	2.013333	2.006667	2	day2	1
BM2_665	0	2	2	2	41	200	ChipsAhoy_small.bmp	Oreos.bmp	21	22	1	u	3	1	0.705551	5	3	2.626667	2.706667	2	day2	1
BM2_665	0	2	2	2	42	204	TeddyGrahamschocolate.bmp	Whatchamacallit.bmp	11	12	1	i	1	0	0.7663	20	23	2.006667	1.646667	2	day2	1
BM2_665	0	2	2	2	43	208	SourSkittles.bmp	Whatchamacallit.bmp	11	12	1	i	1	0	0.858346	22	23	1.7	1.646667	2	day2	1
BM2_665	0	2	2	2	44	212	Laysclassic.bmp	PringlesRed.bmp	23	24	1	i	4	0	0.759079	12	14	2.413333	2.093333	2	day2	1
BM2_665	0	2	2	2	45	218	Ghiradelli_milk_Almonds.bmp	3Musketeers.bmp	11	12	1	u	1	1	0.73387	19	17	2.006667	2.013333	2	day2	1
BM2_665	0	2	2	2	46	224	TeddyGrahamschocolate.bmp	Sourpatch.bmp	11	12	1	i	1	0	0.764619	20	21	2.006667	1.986667	2	day2	1
BM2_665	0	2	2	2	47	229	SourSkittles.bmp	Sourpatch.bmp	11	12	1	u	1	1	1.126384	22	21	1.7	1.986667	2	day2	1
BM2_665	0	2	2	2	48	236	MrGoodbar.bmp	ChipsAhoy_small.bmp	22	21	0	u	3	0	0.826096	7	5	2.613333	2.626667	2	day2	1
BM2_665	0	2	2	2	49	240	Whatchamacallit.bmp	Ghiradelli_milk_Almonds.bmp	12	11	0	i	1	1	0.758903	23	19	1.646667	2.006667	2	day2	1
BM2_665	0	2	2	2	50	250	Goldfish.bmp	MilkyWay.bmp	23	24	1	u	4	1	0.586382	15	10	2.046667	2.446667	2	day2	1
BM2_665	0	2	2	2	51	260	Reeses.bmp	Goldfish.bmp	24	23	0	i	4	1	0.717942	16	15	2.026667	2.046667	2	day2	1
BM2_665	0	2	2	2	52	264	Laysclassic.bmp	MilkyWay.bmp	23	24	1	u	4	1	0.649972	12	10	2.413333	2.446667	2	day2	1
BM2_665	0	2	2	2	53	271	3Musketeers.bmp	SourSkittles.bmp	12	11	0	i	1	1	0.638466	17	22	2.013333	1.7	2	day2	1
BM2_665	0	2	2	2	54	275	Cheetos.bmp	PringlesRed.bmp	23	24	1	u	4	1	0.714505	13	14	2.406667	2.093333	2	day2	1
BM2_665	0	2	2	2	55	279	Toberlorone.bmp	Fritos.bmp	13	14	1	i	2	0	0.727254	26	24	1.566667	1.64	2	day2	1
BM2_665	0	2	2	2	56	283	Ghiradelli_milk.bmp	Oreos.bmp	21	22	1	u	3	1	0.827988	6	3	2.613333	2.706667	2	day2	1
BM2_665	0	2	2	2	57	286	FamousAmos_small.bmp	ChipsAhoy_small.bmp	22	21	0	u	3	0	0.739024	9	5	2.453333	2.626667	2	day2	1
BM2_665	0	2	2	2	58	289	MrGoodbar.bmp	Ghiradelli_milk.bmp	22	21	0	u	3	0	0.650759	7	6	2.613333	2.613333	2	day2	1
BM2_665	0	2	2	2	59	293	FamousAmos_small.bmp	Skittles.bmp	22	21	0	u	3	0	0.671473	9	8	2.453333	2.54	2	day2	1
BM2_665	0	2	2	2	60	296	Skittles.bmp	MrGoodbar.bmp	21	22	1	i	3	0	0.974549	8	7	2.54	2.613333	2	day2	1
BM2_665	0	2	2	2	61	299	Sourpatch.bmp	Ghiradelli_milk_Almonds.bmp	12	11	0	i	1	1	0.654282	21	19	1.986667	2.006667	2	day2	1
BM2_665	0	2	2	2	62	306	Cheetos.bmp	MilkyWay.bmp	23	24	1	u	4	1	1.290052	13	10	2.406667	2.446667	2	day2	1
BM2_665	0	2	2	2	63	311	Jollyranchergreen.bmp	Streusel.bmp	13	14	1	i	2	0	0.667818	27	30	1.533333	1.193333	2	day2	1
BM2_665	0	2	2	2	64	317	Goldfish.bmp	PringlesRed.bmp	23	24	1	u	4	1	0.714493	15	14	2.046667	2.093333	2	day2	1
BM2_665	0	2	2	2	65	320	Reeses.bmp	Laysclassic.bmp	24	23	0	i	4	1	0.601597	16	12	2.026667	2.413333	2	day2	1
BM2_665	0	2	2	2	66	324	CheesyDoritos.bmp	Toberlorone.bmp	14	13	0	u	2	0	0.846321	28	26	1.513333	1.566667	2	day2	1
BM2_665	0	2	2	2	67	327	Reeses.bmp	Cheetos.bmp	24	23	0	i	4	1	1.190005	16	13	2.026667	2.406667	2	day2	1
BM2_665	0	2	2	2	68	330	Toberlorone.bmp	Streusel.bmp	13	14	1	i	2	0	0.725133	26	30	1.566667	1.193333	2	day2	1
BM2_665	0	2	2	2	69	333	Oreos.bmp	Skittles.bmp	22	21	0	i	3	1	0.876866	3	8	2.706667	2.54	2	day2	1
BM2_665	0	2	2	2	70	341	FamousAmos_small.bmp	Ghiradelli_milk.bmp	22	21	0	u	3	0	0.701663	9	6	2.453333	2.613333	2	day2	1
BM2_665	0	2	2	2	71	344	CheesyDoritos.bmp	PayDay.bmp	14	13	0	u	2	0	0.765328	28	29	1.513333	1.193333	2	day2	1
BM2_665	0	2	2	2	72	352	Streusel.bmp	PayDay.bmp	14	13	0	i	2	1	1.086181	30	29	1.193333	1.193333	2	day2	1
BM2_666	0	1	1	1	1	0	Granolabar.bmp	FrootLoops.bmp	21	22	1	u	3	1	1.043353	17	19	1.333333	1.306667	2	day2	1
BM2_666	0	1	1	1	2	9	Reeses.bmp	Laysclassic.bmp	24	23	0	i	4	1	0.794982	29	24	1.033333	1.066667	2	day2	1
BM2_666	0	1	1	1	3	12	FrootLoops.bmp	100grand_small.bmp	22	21	0	i	3	1	0.905991	19	23	1.306667	1.193333	2	day2	1
BM2_666	0	1	1	1	4	17	Keeblerfudgestripes.bmp	FamousAmos_small.bmp	23	24	1	u	4	1	0.907766	28	27	1.04	1.04	2	day2	1
BM2_666	0	1	1	1	5	26	FlamingCheetos.bmp	Cheezits.bmp	12	11	0	u	1	0	0.778262	5	3	1.76	1.846667	2	day2	1
BM2_666	0	1	1	1	6	32	Cheezits.bmp	Sourpatch.bmp	11	12	1	i	1	0	0.681071	3	8	1.846667	1.693333	2	day2	1
BM2_666	0	1	1	1	7	35	PopTartsStrawberry.bmp	Dots_one.bmp	13	14	1	i	2	0	0.872005	16	12	1.393333	1.473333	2	day2	1
BM2_666	0	1	1	1	8	48	CheesyDoritos.bmp	100grand_small.bmp	22	21	0	i	3	1	0.811325	20	23	1.293333	1.193333	2	day2	1
BM2_666	0	1	1	1	9	58	PringlesRed.bmp	Sourpatch.bmp	11	12	1	u	1	1	0.902763	9	8	1.546667	1.693333	2	day2	1
BM2_666	0	1	1	1	10	63	RitzBitz2.bmp	Granolabar.bmp	22	21	0	i	3	1	0.767882	22	17	1.24	1.333333	2	day2	1
BM2_666	0	1	1	1	11	66	Laysclassic.bmp	ChipsAhoy_small.bmp	23	24	1	u	4	1	0.6868	24	26	1.066667	1.04	2	day2	1
BM2_666	0	1	1	1	12	69	Doritosranch.bmp	PopTartsStrawberry.bmp	14	13	0	u	2	0	0.830675	15	16	1.406667	1.393333	2	day2	1
BM2_666	0	1	1	1	13	72	Nutterbutter.bmp	Skittles.bmp	11	12	1	u	1	1	0.726402	7	6	1.693333	1.7	2	day2	1
BM2_666	0	1	1	1	14	82	PopTartsStrawberry.bmp	Funyuns_small.bmp	13	14	1	i	2	0	0.737921	16	13	1.393333	1.466667	2	day2	1
BM2_666	0	1	1	1	15	85	PringlesRed.bmp	Skittles.bmp	11	12	1	u	1	1	0.704958	9	6	1.546667	1.7	2	day2	1
BM2_666	0	1	1	1	16	95	RitzBitz2.bmp	TeddyGrahamschocolate.bmp	22	21	0	i	3	1	0.620471	22	21	1.24	1.246667	2	day2	1
BM2_666	0	1	1	1	17	98	Dots_one.bmp	Cheetos.bmp	14	13	0	u	2	0	0.884234	12	10	1.473333	1.54	2	day2	1
BM2_666	0	1	1	1	18	101	FrootLoops.bmp	TeddyGrahamschocolate.bmp	22	21	0	i	3	1	0.587272	19	21	1.306667	1.246667	2	day2	1
BM2_666	0	1	1	1	19	105	CheesyDoritos.bmp	Granolabar.bmp	22	21	0	i	3	1	0.734961	20	17	1.293333	1.333333	2	day2	1
BM2_666	0	1	1	1	20	109	Funyuns_small.bmp	Cheetos.bmp	14	13	0	u	2	0	0.596681	13	10	1.466667	1.54	2	day2	1
BM2_666	0	1	1	1	21	113	ChipsAhoy_small.bmp	Keeblerfudgestripes.bmp	24	23	0	u	4	0	0.736803	26	28	1.04	1.04	2	day2	1
BM2_666	0	1	1	1	22	119	CheesyDoritos.bmp	TeddyGrahamschocolate.bmp	22	21	0	i	3	1	0.59954	20	21	1.293333	1.246667	2	day2	1
BM2_666	0	1	1	1	23	123	Funyuns_small.bmp	Goldfish.bmp	14	13	0	u	2	0	0.716306	13	14	1.466667	1.44	2	day2	1
BM2_666	0	1	1	1	24	132	RitzBitz2.bmp	100grand_small.bmp	22	21	0	i	3	1	1.194796	22	23	1.24	1.193333	2	day2	1
BM2_666	0	1	1	1	25	140	Nutterbutter.bmp	Sourpatch.bmp	11	12	1	i	1	0	0.619525	7	8	1.693333	1.693333	2	day2	1
BM2_666	0	1	1	1	26	144	Cheetos.bmp	Doritosranch.bmp	13	14	1	u	2	1	0.880286	10	15	1.54	1.406667	2	day2	1
BM2_666	0	1	1	1	27	147	Goldfish.bmp	Doritosranch.bmp	13	14	1	u	2	1	0.727289	14	15	1.44	1.406667	2	day2	1
BM2_666	0	1	1	1	28	151	ChipsAhoy_small.bmp	Fritos.bmp	24	23	0	i	4	1	0.644105	26	30	1.04	1.02	2	day2	1
BM2_666	0	1	1	1	29	154	Nutterbutter.bmp	FlamingCheetos.bmp	11	12	1	i	1	0	0.739848	7	5	1.693333	1.76	2	day2	1
BM2_666	0	1	1	1	30	158	PringlesRed.bmp	FlamingCheetos.bmp	11	12	1	i	1	0	0.695877	9	5	1.546667	1.76	2	day2	1
BM2_666	0	1	1	1	31	161	Laysclassic.bmp	FamousAmos_small.bmp	23	24	1	i	4	0	1.214334	24	27	1.066667	1.04	2	day2	1
BM2_666	0	1	1	1	32	167	Goldfish.bmp	Dots_one.bmp	13	14	1	u	2	1	0.710405	14	12	1.44	1.473333	2	day2	1
BM2_666	0	1	1	1	33	170	Keeblerfudgestripes.bmp	Reeses.bmp	23	24	1	u	4	1	0.934145	28	29	1.04	1.033333	2	day2	1
BM2_666	0	1	1	1	34	174	Cheezits.bmp	Skittles.bmp	11	12	1	u	1	1	0.674183	3	6	1.846667	1.7	2	day2	1
BM2_666	0	1	1	1	35	179	FamousAmos_small.bmp	Fritos.bmp	24	23	0	i	4	1	0.635944	27	30	1.04	1.02	2	day2	1
BM2_666	0	1	1	1	36	182	Reeses.bmp	Fritos.bmp	24	23	0	i	4	1	0.667679	29	30	1.033333	1.02	2	day2	1
BM2_666	0	1	1	2	37	185	Nutterbutter.bmp	FlamingCheetos.bmp	11	12	1	i	1	0	0.754675	7	5	1.693333	1.76	2	day2	1
BM2_666	0	1	1	2	38	188	Fritos.bmp	FamousAmos_small.bmp	23	24	1	u	4	1	0.698434	30	27	1.02	1.04	2	day2	1
BM2_666	0	1	1	2	39	191	Cheetos.bmp	Doritosranch.bmp	13	14	1	u	2	1	1.001463	10	15	1.54	1.406667	2	day2	1
BM2_666	0	1	1	2	40	195	Laysclassic.bmp	ChipsAhoy_small.bmp	23	24	1	i	4	0	0.942228	24	26	1.066667	1.04	2	day2	1
BM2_666	0	1	1	2	41	200	FrootLoops.bmp	TeddyGrahamschocolate.bmp	22	21	0	i	3	1	0.615136	19	21	1.306667	1.246667	2	day2	1
BM2_666	0	1	1	2	42	204	CheesyDoritos.bmp	100grand_small.bmp	22	21	0	i	3	1	1.03666	20	23	1.293333	1.193333	2	day2	1
BM2_666	0	1	1	2	43	208	Funyuns_small.bmp	Cheetos.bmp	14	13	0	u	2	0	0.616702	13	10	1.466667	1.54	2	day2	1
BM2_666	0	1	1	2	44	212	Cheezits.bmp	Sourpatch.bmp	11	12	1	i	1	0	0.621524	3	8	1.846667	1.693333	2	day2	1
BM2_666	0	1	1	2	45	218	ChipsAhoy_small.bmp	Keeblerfudgestripes.bmp	24	23	0	u	4	0	1.028224	26	28	1.04	1.04	2	day2	1
BM2_666	0	1	1	2	46	224	Nutterbutter.bmp	Sourpatch.bmp	11	12	1	i	1	0	0.866968	7	8	1.693333	1.693333	2	day2	1
BM2_666	0	1	1	2	47	229	Reeses.bmp	Laysclassic.bmp	24	23	0	i	4	1	1.356812	29	24	1.033333	1.066667	2	day2	1
BM2_666	0	1	1	2	48	236	Skittles.bmp	Nutterbutter.bmp	12	11	0	i	1	1	0.608564	6	7	1.7	1.693333	2	day2	1
BM2_666	0	1	1	2	49	240	PopTartsStrawberry.bmp	Funyuns_small.bmp	13	14	1	i	2	0	0.509344	16	13	1.393333	1.466667	2	day2	1
BM2_666	0	1	1	2	50	250	Keeblerfudgestripes.bmp	FamousAmos_small.bmp	23	24	1	i	4	0	1.128858	28	27	1.04	1.04	2	day2	1
BM2_666	0	1	1	2	51	260	Laysclassic.bmp	FamousAmos_small.bmp	23	24	1	u	4	1	0.604386	24	27	1.066667	1.04	2	day2	1
BM2_666	0	1	1	2	52	264	CheesyDoritos.bmp	Granolabar.bmp	22	21	0	i	3	1	0.584362	20	17	1.293333	1.333333	2	day2	1
BM2_666	0	1	1	2	53	271	Skittles.bmp	PringlesRed.bmp	12	11	0	i	1	1	0.532901	6	9	1.7	1.546667	2	day2	1
BM2_666	0	1	1	2	54	275	FrootLoops.bmp	Granolabar.bmp	22	21	0	i	3	1	0.552949	19	17	1.306667	1.333333	2	day2	1
BM2_666	0	1	1	2	55	279	Skittles.bmp	Cheezits.bmp	12	11	0	i	1	1	0.573696	6	3	1.7	1.846667	2	day2	1
BM2_666	0	1	1	2	56	283	Goldfish.bmp	Dots_one.bmp	13	14	1	u	2	1	0.626444	14	12	1.44	1.473333	2	day2	1
BM2_666	0	1	1	2	57	286	Fritos.bmp	Reeses.bmp	23	24	1	u	4	1	0.609454	30	29	1.02	1.033333	2	day2	1
BM2_666	0	1	1	2	58	289	TeddyGrahamschocolate.bmp	CheesyDoritos.bmp	21	22	1	u	3	1	0.545214	21	20	1.246667	1.293333	2	day2	1
BM2_666	0	1	1	2	59	293	Dots_one.bmp	Cheetos.bmp	14	13	0	i	2	1	0.549967	12	10	1.473333	1.54	2	day2	1
BM2_666	0	1	1	2	60	296	Keeblerfudgestripes.bmp	Reeses.bmp	23	24	1	u	4	1	0.700955	28	29	1.04	1.033333	2	day2	1
BM2_666	0	1	1	2	61	299	FlamingCheetos.bmp	PringlesRed.bmp	12	11	0	u	1	0	0.708695	5	9	1.76	1.546667	2	day2	1
BM2_666	0	1	1	2	62	306	Dots_one.bmp	PopTartsStrawberry.bmp	14	13	0	u	2	0	0.776498	12	16	1.473333	1.393333	2	day2	1
BM2_666	0	1	1	2	63	311	100grand_small.bmp	RitzBitz2.bmp	21	22	1	u	3	1	0.898265	23	22	1.193333	1.24	2	day2	1
BM2_666	0	1	1	2	64	317	Fritos.bmp	ChipsAhoy_small.bmp	23	24	1	u	4	1	0.753038	30	26	1.02	1.04	2	day2	1
BM2_666	0	1	1	2	65	320	Sourpatch.bmp	PringlesRed.bmp	12	11	0	u	1	0	0.680092	8	9	1.693333	1.546667	2	day2	1
BM2_666	0	1	1	2	66	324	RitzBitz2.bmp	TeddyGrahamschocolate.bmp	22	21	0	i	3	1	0.652815	22	21	1.24	1.246667	2	day2	1
BM2_666	0	1	1	2	67	327	RitzBitz2.bmp	Granolabar.bmp	22	21	0	i	3	1	0.660547	22	17	1.24	1.333333	2	day2	1
BM2_666	0	1	1	2	68	330	Goldfish.bmp	Doritosranch.bmp	13	14	1	u	2	1	0.563607	14	15	1.44	1.406667	2	day2	1
BM2_666	0	1	1	2	69	333	Cheezits.bmp	FlamingCheetos.bmp	11	12	1	i	1	0	0.587296	3	5	1.846667	1.76	2	day2	1
BM2_666	0	1	1	2	70	341	Doritosranch.bmp	PopTartsStrawberry.bmp	14	13	0	u	2	0	0.580079	15	16	1.406667	1.393333	2	day2	1
BM2_666	0	1	1	2	71	344	100grand_small.bmp	FrootLoops.bmp	21	22	1	u	3	1	0.803821	23	19	1.193333	1.306667	2	day2	1
BM2_666	0	1	1	2	72	352	Funyuns_small.bmp	Goldfish.bmp	14	13	0	u	2	0	0.852593	13	14	1.466667	1.44	2	day2	1
BM2_669	0	2	2	1	1	0	MrGoodbar.bmp	FamousAmos_small.bmp	23	24	1	u	4	1	0.687535	13	10	2.146667	2.253333	2	day2	1
BM2_669	0	2	2	1	2	9	RitzBitz2.bmp	Slimjim.bmp	24	23	0	u	4	0	0.878893	14	12	2.133333	2.18	2	day2	1
BM2_669	0	2	2	1	3	12	FigNewton_small.bmp	Jollyranchergreen.bmp	11	12	1	i	1	0	0.605883	19	17	1.953333	1.98	2	day2	1
BM2_669	0	2	2	1	4	17	Skittles.bmp	Nutterbutter.bmp	13	14	1	i	2	0	0.991627	26	24	1.806667	1.86	2	day2	1
BM2_669	0	2	2	1	5	26	Keeblerfudgestripes.bmp	TeddyGrahamschocolate.bmp	11	12	1	u	1	1	0.678161	22	23	1.92	1.913333	2	day2	1
BM2_669	0	2	2	1	6	32	Hersheykisses.bmp	Butterfinger.bmp	13	14	1	u	2	1	0.828929	29	30	1.773333	1.753333	2	day2	1
BM2_669	0	2	2	1	7	35	Riprolls.bmp	Butterfinger.bmp	13	14	1	i	2	0	0.643937	27	30	1.793333	1.753333	2	day2	1
BM2_669	0	2	2	1	8	48	TeddyGrahamschocolate.bmp	Granolabar.bmp	12	11	0	u	1	0	1.207213	23	20	1.913333	1.94	2	day2	1
BM2_669	0	2	2	1	9	58	ChipsAhoy_small.bmp	Slimjim.bmp	24	23	0	u	4	0	0.882681	16	12	1.986667	2.18	2	day2	1
BM2_669	0	2	2	1	10	63	Nutterbutter.bmp	Hersheykisses.bmp	14	13	0	i	2	1	0.731776	24	29	1.86	1.773333	2	day2	1
BM2_669	0	2	2	1	11	66	PayDay.bmp	Riprolls.bmp	14	13	0	i	2	1	0.635123	28	27	1.786667	1.793333	2	day2	1
BM2_669	0	2	2	1	12	69	PopTartsCinnamon.bmp	Milano.bmp	22	21	0	i	3	1	1.067287	7	5	2.446667	2.646667	2	day2	1
BM2_669	0	2	2	1	13	72	PayDay.bmp	Hersheykisses.bmp	14	13	0	i	2	1	0.83429	28	29	1.786667	1.773333	2	day2	1
BM2_669	0	2	2	1	14	82	MrGoodbar.bmp	RitzBitz2.bmp	23	24	1	u	4	1	0.64573	13	14	2.146667	2.133333	2	day2	1
BM2_669	0	2	2	1	15	85	FigNewton_small.bmp	PopTartsStrawberry.bmp	11	12	1	i	1	0	0.772827	19	21	1.953333	1.926667	2	day2	1
BM2_669	0	2	2	1	16	95	Granolabar.bmp	PopTartsStrawberry.bmp	11	12	1	i	1	0	0.712291	20	21	1.94	1.926667	2	day2	1
BM2_669	0	2	2	1	17	98	Cupcakes.bmp	Ghiradelli_milk_Almonds.bmp	22	21	0	i	3	1	0.720051	3	6	2.773333	2.546667	2	day2	1
BM2_669	0	2	2	1	18	101	PopTartsCinnamon.bmp	Twix.bmp	22	21	0	i	3	1	0.879121	7	8	2.446667	2.446667	2	day2	1
BM2_669	0	2	2	1	19	105	Skittles.bmp	PayDay.bmp	13	14	1	i	2	0	0.842998	26	28	1.806667	1.786667	2	day2	1
BM2_669	0	2	2	1	20	109	Jollyranchergreen.bmp	Keeblerfudgestripes.bmp	12	11	0	u	1	0	0.58461	17	22	1.98	1.92	2	day2	1
BM2_669	0	2	2	1	21	113	PopTartsStrawberry.bmp	Keeblerfudgestripes.bmp	12	11	0	u	1	0	0.71665	21	22	1.926667	1.92	2	day2	1
BM2_669	0	2	2	1	22	119	Granolabar.bmp	Jollyranchergreen.bmp	11	12	1	i	1	0	0.651396	20	17	1.94	1.98	2	day2	1
BM2_669	0	2	2	1	23	123	Twix.bmp	HoHo.bmp	21	22	1	u	3	1	1.152168	8	9	2.446667	2.326667	2	day2	1
BM2_669	0	2	2	1	24	132	MrGoodbar.bmp	ChipsAhoy_small.bmp	23	24	1	u	4	1	0.646636	13	16	2.146667	1.986667	2	day2	1
BM2_669	0	2	2	1	25	140	Ghiradelli_milk_Almonds.bmp	PopTartsCinnamon.bmp	21	22	1	u	3	1	0.623418	6	7	2.546667	2.446667	2	day2	1
BM2_669	0	2	2	1	26	144	FamousAmos_small.bmp	Whatchamacallit.bmp	24	23	0	u	4	0	0.876208	10	15	2.253333	2	2	day2	1
BM2_669	0	2	2	1	27	147	FigNewton_small.bmp	TeddyGrahamschocolate.bmp	11	12	1	i	1	0	0.60317	19	23	1.953333	1.913333	2	day2	1
BM2_669	0	2	2	1	28	151	Cupcakes.bmp	Milano.bmp	22	21	0	i	3	1	0.66398	3	5	2.773333	2.646667	2	day2	1
BM2_669	0	2	2	1	29	154	Whatchamacallit.bmp	ChipsAhoy_small.bmp	23	24	1	i	4	0	0.92765	15	16	2	1.986667	2	day2	1
BM2_669	0	2	2	1	30	158	Cupcakes.bmp	Twix.bmp	22	21	0	i	3	1	0.715751	3	8	2.773333	2.446667	2	day2	1
BM2_669	0	2	2	1	31	161	Whatchamacallit.bmp	RitzBitz2.bmp	23	24	1	x	4	NA	NA	15	14	2	2.133333	2	day2	1
BM2_669	0	2	2	1	32	167	HoHo.bmp	Milano.bmp	22	21	0	i	3	1	0.578231	9	5	2.326667	2.646667	2	day2	1
BM2_669	0	2	2	1	33	170	Nutterbutter.bmp	Riprolls.bmp	14	13	0	i	2	1	0.658004	24	27	1.86	1.793333	2	day2	1
BM2_669	0	2	2	1	34	174	FamousAmos_small.bmp	Slimjim.bmp	24	23	0	u	4	0	0.710065	10	12	2.253333	2.18	2	day2	1
BM2_669	0	2	2	1	35	179	HoHo.bmp	Ghiradelli_milk_Almonds.bmp	22	21	0	i	3	1	0.487748	9	6	2.326667	2.546667	2	day2	1
BM2_669	0	2	2	1	36	182	Skittles.bmp	Butterfinger.bmp	13	14	1	i	2	0	0.487565	26	30	1.806667	1.753333	2	day2	1
BM2_669	0	2	2	2	37	185	PayDay.bmp	Riprolls.bmp	14	13	0	i	2	1	0.542569	28	27	1.786667	1.793333	2	day2	1
BM2_669	0	2	2	2	38	188	Milano.bmp	HoHo.bmp	21	22	1	u	3	1	0.590264	5	9	2.646667	2.326667	2	day2	1
BM2_669	0	2	2	2	39	191	Slimjim.bmp	ChipsAhoy_small.bmp	23	24	1	i	4	0	0.58934	12	16	2.18	1.986667	2	day2	1
BM2_669	0	2	2	2	40	195	PopTartsCinnamon.bmp	Milano.bmp	22	21	0	i	3	1	0.498051	7	5	2.446667	2.646667	2	day2	1
BM2_669	0	2	2	2	41	200	ChipsAhoy_small.bmp	MrGoodbar.bmp	24	23	0	i	4	1	0.611073	16	13	1.986667	2.146667	2	day2	1
BM2_669	0	2	2	2	42	204	FigNewton_small.bmp	PopTartsStrawberry.bmp	11	12	1	i	1	0	0.792593	19	21	1.953333	1.926667	2	day2	1
BM2_669	0	2	2	2	43	208	Hersheykisses.bmp	Butterfinger.bmp	13	14	1	u	2	1	0.724634	29	30	1.773333	1.753333	2	day2	1
BM2_669	0	2	2	2	44	212	FigNewton_small.bmp	TeddyGrahamschocolate.bmp	11	12	1	i	1	0	0.67344	19	23	1.953333	1.913333	2	day2	1
BM2_669	0	2	2	2	45	218	Jollyranchergreen.bmp	FigNewton_small.bmp	12	11	0	u	1	0	0.512145	17	19	1.98	1.953333	2	day2	1
BM2_669	0	2	2	2	46	224	Whatchamacallit.bmp	FamousAmos_small.bmp	23	24	1	i	4	0	0.686914	15	10	2	2.253333	2	day2	1
BM2_669	0	2	2	2	47	229	RitzBitz2.bmp	MrGoodbar.bmp	24	23	0	i	4	1	0.45666	14	13	2.133333	2.146667	2	day2	1
BM2_669	0	2	2	2	48	236	Nutterbutter.bmp	Hersheykisses.bmp	14	13	0	i	2	1	0.764474	24	29	1.86	1.773333	2	day2	1
BM2_669	0	2	2	2	49	240	Skittles.bmp	Nutterbutter.bmp	13	14	1	i	2	0	0.5852	26	24	1.806667	1.86	2	day2	1
BM2_669	0	2	2	2	50	250	Keeblerfudgestripes.bmp	TeddyGrahamschocolate.bmp	11	12	1	u	1	1	0.620687	22	23	1.92	1.913333	2	day2	1
BM2_669	0	2	2	2	51	260	FamousAmos_small.bmp	MrGoodbar.bmp	24	23	0	i	4	1	0.608216	10	13	2.253333	2.146667	2	day2	1
BM2_669	0	2	2	2	52	264	Hersheykisses.bmp	PayDay.bmp	13	14	1	u	2	1	0.60421	29	28	1.773333	1.786667	2	day2	1
BM2_669	0	2	2	2	53	271	Ghiradelli_milk_Almonds.bmp	PopTartsCinnamon.bmp	21	22	1	u	3	1	0.640775	6	7	2.546667	2.446667	2	day2	1
BM2_669	0	2	2	2	54	275	Twix.bmp	HoHo.bmp	21	22	1	u	3	1	0.844782	8	9	2.446667	2.326667	2	day2	1
BM2_669	0	2	2	2	55	279	Granolabar.bmp	TeddyGrahamschocolate.bmp	11	12	1	i	1	0	0.633537	20	23	1.94	1.913333	2	day2	1
BM2_669	0	2	2	2	56	283	Milano.bmp	Cupcakes.bmp	21	22	1	u	3	1	0.590261	5	3	2.646667	2.773333	2	day2	1
BM2_669	0	2	2	2	57	286	Butterfinger.bmp	Riprolls.bmp	14	13	0	i	2	1	0.693339	30	27	1.753333	1.793333	2	day2	1
BM2_669	0	2	2	2	58	289	ChipsAhoy_small.bmp	Whatchamacallit.bmp	24	23	0	u	4	0	0.757051	16	15	1.986667	2	2	day2	1
BM2_669	0	2	2	2	59	293	Granolabar.bmp	PopTartsStrawberry.bmp	11	12	1	i	1	0	0.545799	20	21	1.94	1.926667	2	day2	1
BM2_669	0	2	2	2	60	296	HoHo.bmp	Ghiradelli_milk_Almonds.bmp	22	21	0	i	3	1	0.584823	9	6	2.326667	2.546667	2	day2	1
BM2_669	0	2	2	2	61	299	Jollyranchergreen.bmp	Granolabar.bmp	12	11	0	u	1	0	0.560566	17	20	1.98	1.94	2	day2	1
BM2_669	0	2	2	2	62	306	Slimjim.bmp	RitzBitz2.bmp	23	24	1	i	4	0	0.564342	12	14	2.18	2.133333	2	day2	1
BM2_669	0	2	2	2	63	311	Cupcakes.bmp	Ghiradelli_milk_Almonds.bmp	22	21	0	i	3	1	0.542059	3	6	2.773333	2.546667	2	day2	1
BM2_669	0	2	2	2	64	317	Butterfinger.bmp	Skittles.bmp	14	13	0	u	2	0	0.748863	30	26	1.753333	1.806667	2	day2	1
BM2_669	0	2	2	2	65	320	Twix.bmp	PopTartsCinnamon.bmp	21	22	1	i	3	0	0.9959	8	7	2.446667	2.446667	2	day2	1
BM2_669	0	2	2	2	66	324	Slimjim.bmp	FamousAmos_small.bmp	23	24	1	i	4	0	0.672601	12	10	2.18	2.253333	2	day2	1
BM2_669	0	2	2	2	67	327	Jollyranchergreen.bmp	Keeblerfudgestripes.bmp	12	11	0	u	1	0	0.600365	17	22	1.98	1.92	2	day2	1
BM2_669	0	2	2	2	68	330	Cupcakes.bmp	Twix.bmp	22	21	0	i	3	1	0.615439	3	8	2.773333	2.446667	2	day2	1
BM2_669	0	2	2	2	69	333	PopTartsStrawberry.bmp	Keeblerfudgestripes.bmp	12	11	0	i	1	1	0.663176	21	22	1.926667	1.92	2	day2	1
BM2_669	0	2	2	2	70	341	Nutterbutter.bmp	Riprolls.bmp	14	13	0	i	2	1	0.711934	24	27	1.86	1.793333	2	day2	1
BM2_669	0	2	2	2	71	344	Whatchamacallit.bmp	RitzBitz2.bmp	23	24	1	i	4	0	0.743683	15	14	2	2.133333	2	day2	1
BM2_669	0	2	2	2	72	352	PayDay.bmp	Skittles.bmp	14	13	0	i	2	1	0.616401	28	26	1.786667	1.806667	2	day2	1
BM2_670	0	1	1	1	1	0	Goldfish.bmp	RitzBitz2.bmp	22	21	0	i	3	1	1.170028	19	21	1.006667	0.986667	2	day2	1
BM2_670	0	1	1	1	2	10	RitzBitz2.bmp	BabyRuth.bmp	21	22	1	u	3	1	1.078271	21	22	0.986667	0.98	2	day2	1
BM2_670	0	1	1	1	3	13	Laffytaffyred_one.bmp	RitzBitz2.bmp	22	21	0	u	3	0	1.021278	20	21	1	0.986667	2	day2	1
BM2_670	0	1	1	1	4	16	Goldfish.bmp	Ghiradelli_milk.bmp	22	21	0	i	3	1	1.068991	19	23	1.006667	0.593333	2	day2	1
BM2_670	0	1	1	1	5	20	Twix.bmp	Toberlorone.bmp	12	11	0	i	1	1	0.713779	8	3	1.493333	1.98	2	day2	1
BM2_670	0	1	1	1	6	24	Reeses.bmp	Cheezits.bmp	13	14	1	x	2	NA	NA	10	13	1.486667	1.06	2	day2	1
BM2_670	0	1	1	1	7	28	Toberlorone.bmp	PopTartsCinnamon.bmp	11	12	1	u	1	1	0.898589	3	6	1.98	1.506667	2	day2	1
BM2_670	0	1	1	1	8	32	Cheetos.bmp	Butterfinger.bmp	11	12	1	i	1	0	0.671316	9	5	1.486667	1.506667	2	day2	1
BM2_670	0	1	1	1	9	38	Hersheykisses.bmp	Whatchamacallit.bmp	23	24	1	i	4	0	0.933674	28	29	0.52	0.52	2	day2	1
BM2_670	0	1	1	1	10	42	Hersheymilk_several.bmp	PopTartsStrawberry.bmp	23	24	1	u	4	1	0.930845	24	27	0.586667	0.526667	2	day2	1
BM2_670	0	1	1	1	11	45	Cheetos.bmp	PopTartsCinnamon.bmp	11	12	1	i	1	0	0.753884	9	6	1.486667	1.506667	2	day2	1
BM2_670	0	1	1	1	12	48	PopTartsCinnamon.bmp	KitKat_small.bmp	12	11	0	u	1	0	0.937563	6	7	1.506667	1.493333	2	day2	1
BM2_670	0	1	1	1	13	52	Hersheykisses.bmp	Almondjoy.bmp	23	24	1	u	4	1	1.005607	28	26	0.52	0.526667	2	day2	1
BM2_670	0	1	1	1	14	61	Hersheykisses.bmp	PopTartsStrawberry.bmp	23	24	1	u	4	1	0.708118	28	27	0.52	0.526667	2	day2	1
BM2_670	0	1	1	1	15	68	Hersheymilk_several.bmp	Whatchamacallit.bmp	23	24	1	i	4	0	0.791947	24	29	0.586667	0.52	2	day2	1
BM2_670	0	1	1	1	16	73	BabyRuth.bmp	Ghiradelli_milk.bmp	22	21	0	i	3	1	0.92968	22	23	0.98	0.593333	2	day2	1
BM2_670	0	1	1	1	17	77	Twix.bmp	KitKat_small.bmp	12	11	0	u	1	0	0.837406	8	7	1.493333	1.493333	2	day2	1
BM2_670	0	1	1	1	18	80	ChipsAhoy_small.bmp	Goldfish.bmp	21	22	1	u	3	1	1.013461	17	19	1.006667	1.006667	2	day2	1
BM2_670	0	1	1	1	19	84	Almondjoy.bmp	Snickers.bmp	24	23	0	i	4	1	1.154233	26	30	0.526667	0.513333	2	day2	1
BM2_670	0	1	1	1	20	93	Reeses.bmp	FlamingCheetos.bmp	13	14	1	i	2	0	0.816743	10	12	1.486667	1.433333	2	day2	1
BM2_670	0	1	1	1	21	98	Snickers.bmp	Whatchamacallit.bmp	23	24	1	i	4	0	0.850503	30	29	0.513333	0.52	2	day2	1
BM2_670	0	1	1	1	22	101	Cheetos.bmp	Twix.bmp	11	12	1	i	1	0	0.833531	9	8	1.486667	1.493333	2	day2	1
BM2_670	0	1	1	1	23	104	FlamingCheetos.bmp	FamousAmos_small.bmp	14	13	0	u	2	0	0.865246	12	14	1.433333	1.033333	2	day2	1
BM2_670	0	1	1	1	24	108	PopTartsStrawberry.bmp	Snickers.bmp	24	23	0	i	4	1	0.805242	27	30	0.526667	0.513333	2	day2	1
BM2_670	0	1	1	1	25	111	Cheezits.bmp	FamousAmos_small.bmp	14	13	0	i	2	1	0.916979	13	14	1.06	1.033333	2	day2	1
BM2_670	0	1	1	1	26	114	MrGoodbar.bmp	FamousAmos_small.bmp	14	13	0	i	2	1	1.012766	15	14	1.026667	1.033333	2	day2	1
BM2_670	0	1	1	1	27	123	Laffytaffyred_one.bmp	Ghiradelli_milk.bmp	22	21	0	i	3	1	0.850594	20	23	1	0.593333	2	day2	1
BM2_670	0	1	1	1	28	126	Butterfinger.bmp	Toberlorone.bmp	12	11	0	i	1	1	0.794328	5	3	1.506667	1.98	2	day2	1
BM2_670	0	1	1	1	29	130	MrGoodbar.bmp	Reeses.bmp	14	13	0	u	2	0	0.950345	15	10	1.026667	1.486667	2	day2	1
BM2_670	0	1	1	1	30	135	100grand_small.bmp	Cheezits.bmp	13	14	1	i	2	0	0.872088	16	13	1.006667	1.06	2	day2	1
BM2_670	0	1	1	1	31	148	ChipsAhoy_small.bmp	BabyRuth.bmp	21	22	1	u	3	1	0.843385	17	22	1.006667	0.98	2	day2	1
BM2_670	0	1	1	1	32	151	100grand_small.bmp	MrGoodbar.bmp	13	14	1	i	2	0	0.970403	16	15	1.006667	1.026667	2	day2	1
BM2_670	0	1	1	1	33	154	ChipsAhoy_small.bmp	Laffytaffyred_one.bmp	21	22	1	i	3	0	0.786103	17	20	1.006667	1	2	day2	1
BM2_670	0	1	1	1	34	160	Almondjoy.bmp	Hersheymilk_several.bmp	24	23	0	i	4	1	0.936918	26	24	0.526667	0.586667	2	day2	1
BM2_670	0	1	1	1	35	164	FlamingCheetos.bmp	100grand_small.bmp	14	13	0	u	2	0	0.693644	12	16	1.433333	1.006667	2	day2	1
BM2_670	0	1	1	1	36	168	Butterfinger.bmp	KitKat_small.bmp	12	11	0	u	1	0	0.865718	5	7	1.506667	1.493333	2	day2	1
BM2_670	0	1	1	2	37	171	Whatchamacallit.bmp	Hersheykisses.bmp	24	23	0	u	4	0	0.953449	29	28	0.52	0.52	2	day2	1
BM2_670	0	1	1	2	38	177	FlamingCheetos.bmp	100grand_small.bmp	14	13	0	u	2	0	0.864201	12	16	1.433333	1.006667	2	day2	1
BM2_670	0	1	1	2	39	181	KitKat_small.bmp	Twix.bmp	11	12	1	i	1	0	1.204976	7	8	1.493333	1.493333	2	day2	1
BM2_670	0	1	1	2	40	187	Twix.bmp	Cheetos.bmp	12	11	0	u	1	0	0.771755	8	9	1.493333	1.486667	2	day2	1
BM2_670	0	1	1	2	41	192	Cheezits.bmp	100grand_small.bmp	14	13	0	i	2	1	0.852777	13	16	1.06	1.006667	2	day2	1
BM2_670	0	1	1	2	42	202	Cheezits.bmp	Reeses.bmp	14	13	0	u	2	0	0.880314	13	10	1.06	1.486667	2	day2	1
BM2_670	0	1	1	2	43	212	FamousAmos_small.bmp	FlamingCheetos.bmp	13	14	1	i	2	0	0.915816	14	12	1.033333	1.433333	2	day2	1
BM2_670	0	1	1	2	44	220	Almondjoy.bmp	Hersheymilk_several.bmp	24	23	0	i	4	1	1.149336	26	24	0.526667	0.586667	2	day2	1
BM2_670	0	1	1	2	45	224	MrGoodbar.bmp	Reeses.bmp	14	13	0	u	2	0	0.881357	15	10	1.026667	1.486667	2	day2	1
BM2_670	0	1	1	2	46	227	Hersheykisses.bmp	PopTartsStrawberry.bmp	23	24	1	u	4	1	0.825084	28	27	0.52	0.526667	2	day2	1
BM2_670	0	1	1	2	47	230	Snickers.bmp	PopTartsStrawberry.bmp	23	24	1	u	4	1	0.88012	30	27	0.513333	0.526667	2	day2	1
BM2_670	0	1	1	2	48	233	Ghiradelli_milk.bmp	BabyRuth.bmp	21	22	1	u	3	1	0.823884	23	22	0.593333	0.98	2	day2	1
BM2_670	0	1	1	2	49	241	KitKat_small.bmp	PopTartsCinnamon.bmp	11	12	1	i	1	0	1.048658	7	6	1.493333	1.506667	2	day2	1
BM2_670	0	1	1	2	50	244	BabyRuth.bmp	RitzBitz2.bmp	22	21	0	i	3	1	1.472381	22	21	0.98	0.986667	2	day2	1
BM2_670	0	1	1	2	51	252	100grand_small.bmp	MrGoodbar.bmp	13	14	1	i	2	0	1.089203	16	15	1.006667	1.026667	2	day2	1
BM2_670	0	1	1	2	52	259	PopTartsCinnamon.bmp	Toberlorone.bmp	12	11	0	i	1	1	0.772957	6	3	1.506667	1.98	2	day2	1
BM2_670	0	1	1	2	53	262	Whatchamacallit.bmp	Snickers.bmp	24	23	0	i	4	1	1.084704	29	30	0.52	0.513333	2	day2	1
BM2_670	0	1	1	2	54	269	Butterfinger.bmp	Cheetos.bmp	12	11	0	u	1	0	0.944477	5	9	1.506667	1.486667	2	day2	1
BM2_670	0	1	1	2	55	273	Hersheymilk_several.bmp	Whatchamacallit.bmp	23	24	1	i	4	0	0.789211	24	29	0.586667	0.52	2	day2	1
BM2_670	0	1	1	2	56	282	RitzBitz2.bmp	Laffytaffyred_one.bmp	21	22	1	i	3	0	0.97176	21	20	0.986667	1	2	day2	1
BM2_670	0	1	1	2	57	286	Reeses.bmp	FlamingCheetos.bmp	13	14	1	i	2	0	0.8958	10	12	1.486667	1.433333	2	day2	1
BM2_670	0	1	1	2	58	300	Almondjoy.bmp	Hersheykisses.bmp	24	23	0	i	4	1	1.256043	26	28	0.526667	0.52	2	day2	1
BM2_670	0	1	1	2	59	303	FamousAmos_small.bmp	MrGoodbar.bmp	13	14	1	i	2	0	0.823089	14	15	1.033333	1.026667	2	day2	1
BM2_670	0	1	1	2	60	306	ChipsAhoy_small.bmp	BabyRuth.bmp	21	22	1	u	3	1	1.197554	17	22	1.006667	0.98	2	day2	1
BM2_670	0	1	1	2	61	309	Cheezits.bmp	FamousAmos_small.bmp	14	13	0	i	2	1	1.461871	13	14	1.06	1.033333	2	day2	1
BM2_670	0	1	1	2	62	312	Toberlorone.bmp	Twix.bmp	11	12	1	u	1	1	0.661085	3	8	1.98	1.493333	2	day2	1
BM2_670	0	1	1	2	63	315	Goldfish.bmp	RitzBitz2.bmp	22	21	0	u	3	0	1.196627	19	21	1.006667	0.986667	2	day2	1
BM2_670	0	1	1	2	64	318	Ghiradelli_milk.bmp	Laffytaffyred_one.bmp	21	22	1	i	3	0	1.07638	23	20	0.593333	1	2	day2	1
BM2_670	0	1	1	2	65	324	Goldfish.bmp	Ghiradelli_milk.bmp	22	21	0	i	3	1	0.963137	19	23	1.006667	0.593333	2	day2	1
BM2_670	0	1	1	2	66	328	Hersheymilk_several.bmp	PopTartsStrawberry.bmp	23	24	1	x	4	NA	NA	24	27	0.586667	0.526667	2	day2	1
BM2_670	0	1	1	2	67	333	Snickers.bmp	Almondjoy.bmp	23	24	1	u	4	1	0.82564	30	26	0.513333	0.526667	2	day2	1
BM2_670	0	1	1	2	68	339	Butterfinger.bmp	KitKat_small.bmp	12	11	0	u	1	0	0.736429	5	7	1.506667	1.493333	2	day2	1
BM2_670	0	1	1	2	69	342	ChipsAhoy_small.bmp	Goldfish.bmp	21	22	1	u	3	1	1.111463	17	19	1.006667	1.006667	2	day2	1
BM2_670	0	1	1	2	70	345	PopTartsCinnamon.bmp	Cheetos.bmp	12	11	0	u	1	0	0.807186	6	9	1.506667	1.486667	2	day2	1
BM2_670	0	1	1	2	71	349	Toberlorone.bmp	Butterfinger.bmp	11	12	1	u	1	1	0.731929	3	5	1.98	1.506667	2	day2	1
BM2_670	0	1	1	2	72	352	Laffytaffyred_one.bmp	ChipsAhoy_small.bmp	22	21	0	u	3	0	0.946992	20	17	1	1.006667	2	day2	1
BM2_671	0	2	1	1	1	0	Ghiradelli_milk_Almonds.bmp	Sourpatch.bmp	22	21	0	i	3	1	0.673108	6	3	2.02	2.96	2	day2	1
BM2_671	0	2	1	1	2	10	Streusel.bmp	AnimalCrackers.bmp	14	13	0	u	2	0	0.932645	29	30	1.086667	1.08	2	day2	1
BM2_671	0	2	1	1	3	13	Keeblerfudgestripes.bmp	Sourpatch.bmp	22	21	0	i	3	1	0.628371	8	3	2.02	2.96	2	day2	1
BM2_671	0	2	1	1	4	16	CheesyDoritos.bmp	FigNewton_small.bmp	13	14	1	u	2	1	0.979725	28	27	1.146667	1.453333	2	day2	1
BM2_671	0	2	1	1	5	20	PringlesRed.bmp	SourSkittles.bmp	12	11	0	i	1	1	0.576862	22	21	1.526667	1.573333	2	day2	1
BM2_671	0	2	1	1	6	24	Ghiradelli_milk_Almonds.bmp	Goldfish.bmp	22	21	0	i	3	1	0.620908	6	7	2.02	2.02	2	day2	1
BM2_671	0	2	1	1	7	28	Ghiradelli_milk.bmp	ChipsAhoy_small.bmp	23	24	1	u	4	1	0.649641	16	13	1.946667	1.986667	2	day2	1
BM2_671	0	2	1	1	8	32	Toberlorone.bmp	PringlesRed.bmp	11	12	1	u	1	1	0.726398	23	22	1.52	1.526667	2	day2	1
BM2_671	0	2	1	1	9	38	Laffytaffyred_one.bmp	FigNewton_small.bmp	13	14	1	i	2	0	0.692602	24	27	1.493333	1.453333	2	day2	1
BM2_671	0	2	1	1	10	42	SourSkittles.bmp	Riprolls.bmp	11	12	1	u	1	1	0.601932	21	19	1.573333	1.606667	2	day2	1
BM2_671	0	2	1	1	11	45	Chocolate_mm.bmp	Laffytaffyred_one.bmp	14	13	0	u	2	0	0.944943	26	24	1.46	1.493333	2	day2	1
BM2_671	0	2	1	1	12	48	Goldfish.bmp	Keeblerfudgestripes.bmp	21	22	1	u	3	1	0.81663	7	8	2.02	2.02	2	day2	1
BM2_671	0	2	1	1	13	52	Granolabar.bmp	Riprolls.bmp	11	12	1	u	1	1	0.83667	17	19	1.713333	1.606667	2	day2	1
BM2_671	0	2	1	1	14	61	Riprolls.bmp	Toberlorone.bmp	12	11	0	i	1	1	0.827245	19	23	1.606667	1.52	2	day2	1
BM2_671	0	2	1	1	15	68	Doritosranch.bmp	Jollyrancherred.bmp	23	24	1	u	4	1	0.863033	14	15	1.986667	1.98	2	day2	1
BM2_671	0	2	1	1	16	73	Ghiradelli_milk.bmp	Cheezits.bmp	23	24	1	i	4	0	0.800748	16	12	1.946667	2	2	day2	1
BM2_671	0	2	1	1	17	77	Goldfish.bmp	Jollyranchergreen.bmp	21	22	1	u	3	1	0.669531	7	5	2.02	2.76	2	day2	1
BM2_671	0	2	1	1	18	80	Ghiradelli_milk_Almonds.bmp	FamousAmos_small.bmp	22	21	0	i	3	1	0.612551	6	9	2.02	2.006667	2	day2	1
BM2_671	0	2	1	1	19	84	ChipsAhoy_small.bmp	KitKat_small.bmp	24	23	0	i	4	1	0.697247	13	10	1.986667	2.006667	2	day2	1
BM2_671	0	2	1	1	20	93	AnimalCrackers.bmp	Chocolate_mm.bmp	13	14	1	i	2	0	0.735816	30	26	1.08	1.46	2	day2	1
BM2_671	0	2	1	1	21	98	KitKat_small.bmp	Jollyrancherred.bmp	23	24	1	u	4	1	0.713588	10	15	2.006667	1.98	2	day2	1
BM2_671	0	2	1	1	22	101	Toberlorone.bmp	Skittles.bmp	11	12	1	i	1	0	0.752614	23	20	1.52	1.593333	2	day2	1
BM2_671	0	2	1	1	23	104	Skittles.bmp	SourSkittles.bmp	12	11	0	i	1	1	0.832285	20	21	1.593333	1.573333	2	day2	1
BM2_671	0	2	1	1	24	108	FigNewton_small.bmp	AnimalCrackers.bmp	14	13	0	i	2	1	0.884388	27	30	1.453333	1.08	2	day2	1
BM2_671	0	2	1	1	25	111	Streusel.bmp	CheesyDoritos.bmp	14	13	0	i	2	1	0.74014	29	28	1.086667	1.146667	2	day2	1
BM2_671	0	2	1	1	26	114	Doritosranch.bmp	ChipsAhoy_small.bmp	23	24	1	u	4	1	0.651843	14	13	1.986667	1.986667	2	day2	1
BM2_671	0	2	1	1	27	123	PringlesRed.bmp	Granolabar.bmp	12	11	0	i	1	1	0.729645	22	17	1.526667	1.713333	2	day2	1
BM2_671	0	2	1	1	28	126	Skittles.bmp	Granolabar.bmp	12	11	0	i	1	1	0.753407	20	17	1.593333	1.713333	2	day2	1
BM2_671	0	2	1	1	29	130	Cheezits.bmp	Doritosranch.bmp	24	23	0	i	4	1	0.645457	12	14	2	1.986667	2	day2	1
BM2_671	0	2	1	1	30	135	KitKat_small.bmp	Cheezits.bmp	23	24	1	i	4	0	0.735217	10	12	2.006667	2	2	day2	1
BM2_671	0	2	1	1	31	148	Chocolate_mm.bmp	CheesyDoritos.bmp	14	13	0	i	2	1	0.754386	26	28	1.46	1.146667	2	day2	1
BM2_671	0	2	1	1	32	151	Keeblerfudgestripes.bmp	FamousAmos_small.bmp	22	21	0	i	3	1	0.745499	8	9	2.02	2.006667	2	day2	1
BM2_671	0	2	1	1	33	154	Laffytaffyred_one.bmp	Streusel.bmp	13	14	1	u	2	1	0.825212	24	29	1.493333	1.086667	2	day2	1
BM2_671	0	2	1	1	34	160	Jollyranchergreen.bmp	FamousAmos_small.bmp	22	21	0	i	3	1	0.688014	5	9	2.76	2.006667	2	day2	1
BM2_671	0	2	1	1	35	164	Ghiradelli_milk.bmp	Jollyrancherred.bmp	23	24	1	i	4	0	0.588047	16	15	1.946667	1.98	2	day2	1
BM2_671	0	2	1	1	36	168	Sourpatch.bmp	Jollyranchergreen.bmp	21	22	1	u	3	1	0.672801	3	5	2.96	2.76	2	day2	1
BM2_671	0	2	1	2	37	171	ChipsAhoy_small.bmp	Doritosranch.bmp	24	23	0	i	4	1	0.664524	13	14	1.986667	1.986667	2	day2	1
BM2_671	0	2	1	2	38	177	SourSkittles.bmp	Skittles.bmp	11	12	1	u	1	1	0.711307	21	20	1.573333	1.593333	2	day2	1
BM2_671	0	2	1	2	39	181	Jollyrancherred.bmp	Doritosranch.bmp	24	23	0	i	4	1	0.724056	15	14	1.98	1.986667	2	day2	1
BM2_671	0	2	1	2	40	187	CheesyDoritos.bmp	Streusel.bmp	13	14	1	u	2	1	0.738823	28	29	1.146667	1.086667	2	day2	1
BM2_671	0	2	1	2	41	192	SourSkittles.bmp	Riprolls.bmp	11	12	1	u	1	1	0.652587	21	19	1.573333	1.606667	2	day2	1
BM2_671	0	2	1	2	42	202	Jollyranchergreen.bmp	Sourpatch.bmp	22	21	0	i	3	1	0.519409	5	3	2.76	2.96	2	day2	1
BM2_671	0	2	1	2	43	212	CheesyDoritos.bmp	FigNewton_small.bmp	13	14	1	u	2	1	0.562862	28	27	1.146667	1.453333	2	day2	1
BM2_671	0	2	1	2	44	220	FigNewton_small.bmp	Laffytaffyred_one.bmp	14	13	0	u	2	0	0.819655	27	24	1.453333	1.493333	2	day2	1
BM2_671	0	2	1	2	45	224	Granolabar.bmp	PringlesRed.bmp	11	12	1	u	1	1	0.592386	17	22	1.713333	1.526667	2	day2	1
BM2_671	0	2	1	2	46	227	Cheezits.bmp	Ghiradelli_milk.bmp	24	23	0	u	4	0	0.984128	12	16	2	1.946667	2	day2	1
BM2_671	0	2	1	2	47	230	Laffytaffyred_one.bmp	Chocolate_mm.bmp	13	14	1	i	2	0	0.807217	24	26	1.493333	1.46	2	day2	1
BM2_671	0	2	1	2	48	233	Goldfish.bmp	Ghiradelli_milk_Almonds.bmp	21	22	1	u	3	1	0.56695	7	6	2.02	2.02	2	day2	1
BM2_671	0	2	1	2	49	241	Granolabar.bmp	Riprolls.bmp	11	12	1	u	1	1	0.711725	17	19	1.713333	1.606667	2	day2	1
BM2_671	0	2	1	2	50	244	Granolabar.bmp	Skittles.bmp	11	12	1	u	1	1	0.559428	17	20	1.713333	1.593333	2	day2	1
BM2_671	0	2	1	2	51	252	Ghiradelli_milk.bmp	ChipsAhoy_small.bmp	23	24	1	i	4	0	0.640273	16	13	1.946667	1.986667	2	day2	1
BM2_671	0	2	1	2	52	259	AnimalCrackers.bmp	Chocolate_mm.bmp	13	14	1	i	2	0	0.587986	30	26	1.08	1.46	2	day2	1
BM2_671	0	2	1	2	53	262	Sourpatch.bmp	Ghiradelli_milk_Almonds.bmp	21	22	1	u	3	1	0.603802	3	6	2.96	2.02	2	day2	1
BM2_671	0	2	1	2	54	269	Chocolate_mm.bmp	CheesyDoritos.bmp	14	13	0	i	2	1	0.839549	26	28	1.46	1.146667	2	day2	1
BM2_671	0	2	1	2	55	273	AnimalCrackers.bmp	Streusel.bmp	13	14	1	i	2	0	0.63633	30	29	1.08	1.086667	2	day2	1
BM2_671	0	2	1	2	56	282	Ghiradelli_milk_Almonds.bmp	FamousAmos_small.bmp	22	21	0	i	3	1	0.68283	6	9	2.02	2.006667	2	day2	1
BM2_671	0	2	1	2	57	286	SourSkittles.bmp	PringlesRed.bmp	11	12	1	u	1	1	0.510866	21	22	1.573333	1.526667	2	day2	1
BM2_671	0	2	1	2	58	300	Goldfish.bmp	Jollyranchergreen.bmp	21	22	1	u	3	1	0.911138	7	5	2.02	2.76	2	day2	1
BM2_671	0	2	1	2	59	303	Cheezits.bmp	KitKat_small.bmp	24	23	0	i	4	1	0.750112	12	10	2	2.006667	2	day2	1
BM2_671	0	2	1	2	60	306	Jollyrancherred.bmp	KitKat_small.bmp	24	23	0	i	4	1	0.605898	15	10	1.98	2.006667	2	day2	1
BM2_671	0	2	1	2	61	309	Keeblerfudgestripes.bmp	FamousAmos_small.bmp	22	21	0	i	3	1	0.700892	8	9	2.02	2.006667	2	day2	1
BM2_671	0	2	1	2	62	312	Cheezits.bmp	Doritosranch.bmp	24	23	0	i	4	1	0.603634	12	14	2	1.986667	2	day2	1
BM2_671	0	2	1	2	63	315	Streusel.bmp	Laffytaffyred_one.bmp	14	13	0	u	2	0	0.788396	29	24	1.086667	1.493333	2	day2	1
BM2_671	0	2	1	2	64	318	FigNewton_small.bmp	AnimalCrackers.bmp	14	13	0	i	2	1	0.963458	27	30	1.453333	1.08	2	day2	1
BM2_671	0	2	1	2	65	324	ChipsAhoy_small.bmp	KitKat_small.bmp	24	23	0	i	4	1	0.650213	13	10	1.986667	2.006667	2	day2	1
BM2_671	0	2	1	2	66	328	Skittles.bmp	Toberlorone.bmp	12	11	0	u	1	0	0.61495	20	23	1.593333	1.52	2	day2	1
BM2_671	0	2	1	2	67	333	Toberlorone.bmp	PringlesRed.bmp	11	12	1	i	1	0	0.784714	23	22	1.52	1.526667	2	day2	1
BM2_671	0	2	1	2	68	339	Toberlorone.bmp	Riprolls.bmp	11	12	1	u	1	1	0.591475	23	19	1.52	1.606667	2	day2	1
BM2_671	0	2	1	2	69	342	Keeblerfudgestripes.bmp	Sourpatch.bmp	22	21	0	i	3	1	0.60651	8	3	2.02	2.96	2	day2	1
BM2_671	0	2	1	2	70	345	FamousAmos_small.bmp	Jollyranchergreen.bmp	21	22	1	u	3	1	0.694254	9	5	2.006667	2.76	2	day2	1
BM2_671	0	2	1	2	71	349	Keeblerfudgestripes.bmp	Goldfish.bmp	22	21	0	i	3	1	0.578964	8	7	2.02	2.02	2	day2	1
BM2_671	0	2	1	2	72	352	Jollyrancherred.bmp	Ghiradelli_milk.bmp	24	23	0	i	4	1	0.570031	15	16	1.98	1.946667	2	day2	1
BM2_672	0	1	2	1	1	0	Reeses.bmp	PeanutMMs.bmp	14	13	0	u	2	0	0.670438	10	12	0.833333	0.806667	2	day2	1
BM2_672	0	1	2	1	2	9	Granolabar.bmp	Reeses.bmp	13	14	1	i	2	0	0.653679	13	10	0.786667	0.833333	2	day2	1
BM2_672	0	1	2	1	3	12	Sourpatch.bmp	Nutterbutter.bmp	14	13	0	u	2	0	1.076741	14	15	0.78	0.766667	2	day2	1
BM2_672	0	1	2	1	4	17	KitKat_small.bmp	Ghiradelli_milk.bmp	12	11	0	i	1	1	0.918473	9	6	0.84	1.013333	2	day2	1
BM2_672	0	1	2	1	5	26	Doritosranch.bmp	Laysclassic.bmp	24	23	0	i	4	1	1.10899	24	27	0.693333	0.626667	2	day2	1
BM2_672	0	1	2	1	6	32	RitzBitz2.bmp	Laysclassic.bmp	24	23	0	u	4	0	1.155779	28	27	0.593333	0.626667	2	day2	1
BM2_672	0	1	2	1	7	35	RitzBitz2.bmp	PopTartsStrawberry.bmp	24	23	0	u	4	0	1.026858	28	29	0.593333	0.586667	2	day2	1
BM2_672	0	1	2	1	8	48	Laysclassic.bmp	Butterfinger.bmp	23	24	1	u	4	1	1.230004	27	30	0.626667	0.566667	2	day2	1
BM2_672	0	1	2	1	9	58	TeddyGrahamschocolate.bmp	Chocolate_mm.bmp	11	12	1	i	1	0	1.121546	8	7	0.873333	0.966667	2	day2	1
BM2_672	0	1	2	1	10	63	FamousAmos_small.bmp	Granolabar.bmp	14	13	0	i	2	1	0.978592	16	13	0.76	0.786667	2	day2	1
BM2_672	0	1	2	1	11	66	3Musketeers.bmp	RitzBitz2.bmp	23	24	1	i	4	0	1.129668	26	28	0.646667	0.593333	2	day2	1
BM2_672	0	1	2	1	12	69	PopTartsStrawberry.bmp	Doritosranch.bmp	23	24	1	u	4	1	1.178079	29	24	0.586667	0.693333	2	day2	1
BM2_672	0	1	2	1	13	72	Twix.bmp	ChipsAhoy_small.bmp	22	21	0	x	3	NA	NA	23	22	0.713333	0.713333	2	day2	1
BM2_672	0	1	2	1	14	82	Doritosranch.bmp	3Musketeers.bmp	24	23	0	i	4	1	0.82066	24	26	0.693333	0.646667	2	day2	1
BM2_672	0	1	2	1	15	85	100grand_small.bmp	ChipsAhoy_small.bmp	22	21	0	i	3	1	1.035671	17	22	0.753333	0.713333	2	day2	1
BM2_672	0	1	2	1	16	95	3Musketeers.bmp	Butterfinger.bmp	23	24	1	u	4	1	0.823199	26	30	0.646667	0.566667	2	day2	1
BM2_672	0	1	2	1	17	98	KitKat_small.bmp	TeddyGrahamschocolate.bmp	12	11	0	u	1	0	1.02296	9	8	0.84	0.873333	2	day2	1
BM2_672	0	1	2	1	18	101	Cheetos.bmp	Twix.bmp	21	22	1	u	3	1	1.13399	19	23	0.74	0.713333	2	day2	1
BM2_672	0	1	2	1	19	105	Ghiradelli_milk.bmp	Ghiradelli_milk_Almonds.bmp	11	12	1	u	1	1	0.913775	6	3	1.013333	1.04	2	day2	1
BM2_672	0	1	2	1	20	109	Butterfinger.bmp	PopTartsStrawberry.bmp	24	23	0	i	4	1	1.07949	30	29	0.566667	0.586667	2	day2	1
BM2_672	0	1	2	1	21	113	Skittles.bmp	KitKat_small.bmp	11	12	1	i	1	0	0.891497	5	9	1.02	0.84	2	day2	1
BM2_672	0	1	2	1	22	119	FamousAmos_small.bmp	PeanutMMs.bmp	14	13	0	u	2	0	0.794296	16	12	0.76	0.806667	2	day2	1
BM2_672	0	1	2	1	23	123	Keeblerfudgestripes.bmp	PopTartsCinnamon.bmp	21	22	1	u	3	1	0.830986	20	21	0.74	0.733333	2	day2	1
BM2_672	0	1	2	1	24	132	Cheetos.bmp	100grand_small.bmp	21	22	1	u	3	1	0.837549	19	17	0.74	0.753333	2	day2	1
BM2_672	0	1	2	1	25	140	Ghiradelli_milk_Almonds.bmp	Skittles.bmp	12	11	0	u	1	0	0.854345	3	5	1.04	1.02	2	day2	1
BM2_672	0	1	2	1	26	144	Cheetos.bmp	PopTartsCinnamon.bmp	21	22	1	u	3	1	1.019093	19	21	0.74	0.733333	2	day2	1
BM2_672	0	1	2	1	27	147	100grand_small.bmp	Keeblerfudgestripes.bmp	22	21	0	i	3	1	0.898097	17	20	0.753333	0.74	2	day2	1
BM2_672	0	1	2	1	28	151	Granolabar.bmp	Sourpatch.bmp	13	14	1	u	2	1	0.982877	13	14	0.786667	0.78	2	day2	1
BM2_672	0	1	2	1	29	154	PeanutMMs.bmp	Sourpatch.bmp	13	14	1	i	2	0	1.310615	12	14	0.806667	0.78	2	day2	1
BM2_672	0	1	2	1	30	158	TeddyGrahamschocolate.bmp	Ghiradelli_milk_Almonds.bmp	11	12	1	i	1	0	0.818652	8	3	0.873333	1.04	2	day2	1
BM2_672	0	1	2	1	31	161	Chocolate_mm.bmp	Ghiradelli_milk.bmp	12	11	0	i	1	1	0.777422	7	6	0.966667	1.013333	2	day2	1
BM2_672	0	1	2	1	32	167	Nutterbutter.bmp	Reeses.bmp	13	14	1	i	2	0	0.76916	15	10	0.766667	0.833333	2	day2	1
BM2_672	0	1	2	1	33	170	Nutterbutter.bmp	FamousAmos_small.bmp	13	14	1	u	2	1	0.928897	15	16	0.766667	0.76	2	day2	1
BM2_672	0	1	2	1	34	174	PopTartsCinnamon.bmp	ChipsAhoy_small.bmp	22	21	0	i	3	1	0.964944	21	22	0.733333	0.713333	2	day2	1
BM2_672	0	1	2	1	35	179	Twix.bmp	Keeblerfudgestripes.bmp	22	21	0	i	3	1	1.110624	23	20	0.713333	0.74	2	day2	1
BM2_672	0	1	2	1	36	182	Skittles.bmp	Chocolate_mm.bmp	11	12	1	u	1	1	1.238405	5	7	1.02	0.966667	2	day2	1
BM2_672	0	1	2	2	37	185	Skittles.bmp	Chocolate_mm.bmp	11	12	1	u	1	1	0.805475	5	7	1.02	0.966667	2	day2	1
BM2_672	0	1	2	2	38	188	Reeses.bmp	Nutterbutter.bmp	14	13	0	u	2	0	0.901155	10	15	0.833333	0.766667	2	day2	1
BM2_672	0	1	2	2	39	191	Chocolate_mm.bmp	Ghiradelli_milk.bmp	12	11	0	i	1	1	0.644221	7	6	0.966667	1.013333	2	day2	1
BM2_672	0	1	2	2	40	195	Laysclassic.bmp	Doritosranch.bmp	23	24	1	u	4	1	1.096993	27	24	0.626667	0.693333	2	day2	1
BM2_672	0	1	2	2	41	200	3Musketeers.bmp	RitzBitz2.bmp	23	24	1	u	4	1	0.849504	26	28	0.646667	0.593333	2	day2	1
BM2_672	0	1	2	2	42	204	Cheetos.bmp	Twix.bmp	21	22	1	u	3	1	0.8555	19	23	0.74	0.713333	2	day2	1
BM2_672	0	1	2	2	43	208	Ghiradelli_milk_Almonds.bmp	Skittles.bmp	12	11	0	u	1	0	0.73154	3	5	1.04	1.02	2	day2	1
BM2_672	0	1	2	2	44	212	Ghiradelli_milk_Almonds.bmp	Ghiradelli_milk.bmp	12	11	0	i	1	1	0.672248	3	6	1.04	1.013333	2	day2	1
BM2_672	0	1	2	2	45	218	PeanutMMs.bmp	Sourpatch.bmp	13	14	1	u	2	1	0.766981	12	14	0.806667	0.78	2	day2	1
BM2_672	0	1	2	2	46	224	100grand_small.bmp	ChipsAhoy_small.bmp	22	21	0	i	3	1	0.965825	17	22	0.753333	0.713333	2	day2	1
BM2_672	0	1	2	2	47	229	Twix.bmp	Keeblerfudgestripes.bmp	22	21	0	i	3	1	0.96753	23	20	0.713333	0.74	2	day2	1
BM2_672	0	1	2	2	48	236	PeanutMMs.bmp	FamousAmos_small.bmp	13	14	1	i	2	0	1.05936	12	16	0.806667	0.76	2	day2	1
BM2_672	0	1	2	2	49	240	Granolabar.bmp	FamousAmos_small.bmp	13	14	1	u	2	1	0.984137	13	16	0.786667	0.76	2	day2	1
BM2_672	0	1	2	2	50	250	PopTartsCinnamon.bmp	Keeblerfudgestripes.bmp	22	21	0	i	3	1	0.803614	21	20	0.733333	0.74	2	day2	1
BM2_672	0	1	2	2	51	260	Ghiradelli_milk.bmp	KitKat_small.bmp	11	12	1	u	1	1	0.671157	6	9	1.013333	0.84	2	day2	1
BM2_672	0	1	2	2	52	264	Nutterbutter.bmp	FamousAmos_small.bmp	13	14	1	u	2	1	0.891114	15	16	0.766667	0.76	2	day2	1
BM2_672	0	1	2	2	53	271	Sourpatch.bmp	Nutterbutter.bmp	14	13	0	i	2	1	1.063679	14	15	0.78	0.766667	2	day2	1
BM2_672	0	1	2	2	54	275	PopTartsStrawberry.bmp	RitzBitz2.bmp	23	24	1	u	4	1	1.411703	29	28	0.586667	0.593333	2	day2	1
BM2_672	0	1	2	2	55	279	KitKat_small.bmp	TeddyGrahamschocolate.bmp	12	11	0	u	1	0	1.168452	9	8	0.84	0.873333	2	day2	1
BM2_672	0	1	2	2	56	283	PeanutMMs.bmp	Reeses.bmp	13	14	1	i	2	0	0.829229	12	10	0.806667	0.833333	2	day2	1
BM2_672	0	1	2	2	57	286	RitzBitz2.bmp	Laysclassic.bmp	24	23	0	u	4	0	1.316258	28	27	0.593333	0.626667	2	day2	1
BM2_672	0	1	2	2	58	289	Reeses.bmp	Granolabar.bmp	14	13	0	x	2	NA	NA	10	13	0.833333	0.786667	2	day2	1
BM2_672	0	1	2	2	59	293	Sourpatch.bmp	Granolabar.bmp	14	13	0	i	2	1	0.86474	14	13	0.78	0.786667	2	day2	1
BM2_672	0	1	2	2	60	296	3Musketeers.bmp	Butterfinger.bmp	23	24	1	u	4	1	0.871727	26	30	0.646667	0.566667	2	day2	1
BM2_672	0	1	2	2	61	299	PopTartsStrawberry.bmp	Butterfinger.bmp	23	24	1	u	4	1	0.879514	29	30	0.586667	0.566667	2	day2	1
BM2_672	0	1	2	2	62	306	Twix.bmp	ChipsAhoy_small.bmp	22	21	0	i	3	1	0.930142	23	22	0.713333	0.713333	2	day2	1
BM2_672	0	1	2	2	63	311	PopTartsCinnamon.bmp	Cheetos.bmp	22	21	0	i	3	1	0.829006	21	19	0.733333	0.74	2	day2	1
BM2_672	0	1	2	2	64	317	3Musketeers.bmp	Doritosranch.bmp	23	24	1	u	4	1	0.68382	26	24	0.646667	0.693333	2	day2	1
BM2_672	0	1	2	2	65	320	Butterfinger.bmp	Laysclassic.bmp	24	23	0	i	4	1	0.842781	30	27	0.566667	0.626667	2	day2	1
BM2_672	0	1	2	2	66	324	TeddyGrahamschocolate.bmp	Ghiradelli_milk_Almonds.bmp	11	12	1	i	1	0	0.655598	8	3	0.873333	1.04	2	day2	1
BM2_672	0	1	2	2	67	327	ChipsAhoy_small.bmp	PopTartsCinnamon.bmp	21	22	1	u	3	1	0.807269	22	21	0.713333	0.733333	2	day2	1
BM2_672	0	1	2	2	68	330	Doritosranch.bmp	PopTartsStrawberry.bmp	24	23	0	i	4	1	0.734377	24	29	0.693333	0.586667	2	day2	1
BM2_672	0	1	2	2	69	333	KitKat_small.bmp	Skittles.bmp	12	11	0	u	1	0	1.182078	9	5	0.84	1.02	2	day2	1
BM2_672	0	1	2	2	70	341	Cheetos.bmp	100grand_small.bmp	21	22	1	u	3	1	0.766861	19	17	0.74	0.753333	2	day2	1
BM2_672	0	1	2	2	71	344	100grand_small.bmp	Keeblerfudgestripes.bmp	22	21	0	i	3	1	0.942617	17	20	0.753333	0.74	2	day2	1
BM2_672	0	1	2	2	72	352	TeddyGrahamschocolate.bmp	Chocolate_mm.bmp	11	12	1	i	1	0	0.879431	8	7	0.873333	0.966667	2	day2	1
BM2_673	0	2	2	1	1	0	Laysclassic.bmp	FigNewton_small.bmp	12	11	0	x	1	NA	NA	23	19	1.04	1.053333	2	day2	1
BM2_673	0	2	2	1	2	10	Laysclassic.bmp	3Musketeers.bmp	12	11	0	i	1	1	0.738652	23	22	1.04	1.04	2	day2	1
BM2_673	0	2	2	1	3	13	Dots_one.bmp	FlamingCheetos.bmp	14	13	0	i	2	1	0.68234	30	27	1.013333	1.026667	2	day2	1
BM2_673	0	2	2	1	4	16	Ghiradelli_milk.bmp	MilkyWay.bmp	23	24	1	i	4	0	0.865857	15	16	1.24	1.193333	2	day2	1
BM2_673	0	2	2	1	5	20	Sourpatch.bmp	3Musketeers.bmp	12	11	0	i	1	1	0.566888	21	22	1.046667	1.04	2	day2	1
BM2_673	0	2	2	1	6	24	BabyRuth.bmp	FlamingCheetos.bmp	14	13	0	i	2	1	1.16293	24	27	1.033333	1.026667	2	day2	1
BM2_673	0	2	2	1	7	28	Snickers.bmp	KitKat_small.bmp	23	24	1	i	4	0	0.67966	12	14	1.353333	1.286667	2	day2	1
BM2_673	0	2	2	1	8	32	Riprolls.bmp	Twinkie.bmp	21	22	1	u	3	1	0.676379	8	9	1.433333	1.4	2	day2	1
BM2_673	0	2	2	1	9	38	Ghiradelli_milk_Almonds.bmp	Snickers.bmp	24	23	0	i	4	1	0.498453	10	12	1.393333	1.353333	2	day2	1
BM2_673	0	2	2	1	10	42	3Musketeers.bmp	SourSkittles.bmp	11	12	1	i	1	0	0.751961	22	17	1.04	1.193333	2	day2	1
BM2_673	0	2	2	1	11	45	Skittles.bmp	Funyuns_small.bmp	13	14	1	i	2	0	0.918914	26	28	1.033333	1.02	2	day2	1
BM2_673	0	2	2	1	12	48	Cupcakes.bmp	MrGoodbar.bmp	21	22	1	u	3	1	1.022721	6	3	1.446667	1.593333	2	day2	1
BM2_673	0	2	2	1	13	52	SourSkittles.bmp	FigNewton_small.bmp	12	11	0	u	1	0	0.762732	17	19	1.193333	1.053333	2	day2	1
BM2_673	0	2	2	1	14	61	Dots_one.bmp	Nutterbutter.bmp	14	13	0	u	2	0	0.641261	30	29	1.013333	1.02	2	day2	1
BM2_673	0	2	2	1	15	68	FamousAmos_small.bmp	MilkyWay.bmp	23	24	1	u	4	1	1.093062	13	16	1.34	1.193333	2	day2	1
BM2_673	0	2	2	1	16	73	Funyuns_small.bmp	FlamingCheetos.bmp	14	13	0	i	2	1	0.798759	28	27	1.02	1.026667	2	day2	1
BM2_673	0	2	2	1	17	77	Twix.bmp	Twinkie.bmp	21	22	1	u	3	1	0.587567	5	9	1.486667	1.4	2	day2	1
BM2_673	0	2	2	1	18	80	MilkyWay.bmp	Snickers.bmp	24	23	0	i	4	1	0.906589	16	12	1.193333	1.353333	2	day2	1
BM2_673	0	2	2	1	19	84	Ghiradelli_milk.bmp	KitKat_small.bmp	23	24	1	i	4	0	0.543315	15	14	1.24	1.286667	2	day2	1
BM2_673	0	2	2	1	20	93	Ghiradelli_milk_Almonds.bmp	Ghiradelli_milk.bmp	24	23	0	i	4	1	1.013847	10	15	1.393333	1.24	2	day2	1
BM2_673	0	2	2	1	21	98	Nutterbutter.bmp	Funyuns_small.bmp	13	14	1	u	2	1	1.183636	29	28	1.02	1.02	2	day2	1
BM2_673	0	2	2	1	22	101	KitKat_small.bmp	FamousAmos_small.bmp	24	23	0	i	4	1	1.150582	14	13	1.286667	1.34	2	day2	1
BM2_673	0	2	2	1	23	104	Cupcakes.bmp	Twinkie.bmp	21	22	1	u	3	1	0.654335	6	9	1.446667	1.4	2	day2	1
BM2_673	0	2	2	1	24	108	BabyRuth.bmp	Skittles.bmp	14	13	0	i	2	1	0.578426	24	26	1.033333	1.033333	2	day2	1
BM2_673	0	2	2	1	25	111	MrGoodbar.bmp	Riprolls.bmp	22	21	0	i	3	1	0.657917	3	8	1.593333	1.433333	2	day2	1
BM2_673	0	2	2	1	26	114	SourSkittles.bmp	PopTartsCinnamon.bmp	12	11	0	u	1	0	0.681898	17	20	1.193333	1.046667	2	day2	1
BM2_673	0	2	2	1	27	123	FamousAmos_small.bmp	Ghiradelli_milk_Almonds.bmp	23	24	1	u	4	1	0.615705	13	10	1.34	1.393333	2	day2	1
BM2_673	0	2	2	1	28	126	Nutterbutter.bmp	BabyRuth.bmp	13	14	1	i	2	0	0.575445	29	24	1.02	1.033333	2	day2	1
BM2_673	0	2	2	1	29	130	Twix.bmp	MrGoodbar.bmp	21	22	1	i	3	0	1.219462	5	3	1.486667	1.593333	2	day2	1
BM2_673	0	2	2	1	30	135	Sourpatch.bmp	FigNewton_small.bmp	12	11	0	u	1	0	0.733244	21	19	1.046667	1.053333	2	day2	1
BM2_673	0	2	2	1	31	148	PopTartsCinnamon.bmp	Laysclassic.bmp	11	12	1	i	1	0	0.816512	20	23	1.046667	1.04	2	day2	1
BM2_673	0	2	2	1	32	151	Cupcakes.bmp	Granolabar.bmp	21	22	1	u	3	1	0.631536	6	7	1.446667	1.44	2	day2	1
BM2_673	0	2	2	1	33	154	Dots_one.bmp	Skittles.bmp	14	13	0	u	2	0	1.119195	30	26	1.013333	1.033333	2	day2	1
BM2_673	0	2	2	1	34	160	Riprolls.bmp	Granolabar.bmp	21	22	1	u	3	1	0.613956	8	7	1.433333	1.44	2	day2	1
BM2_673	0	2	2	1	35	164	PopTartsCinnamon.bmp	Sourpatch.bmp	11	12	1	i	1	0	0.754085	20	21	1.046667	1.046667	2	day2	1
BM2_673	0	2	2	1	36	168	Granolabar.bmp	Twix.bmp	22	21	0	i	3	1	0.566846	7	5	1.44	1.486667	2	day2	1
BM2_673	0	2	2	2	37	171	3Musketeers.bmp	Laysclassic.bmp	11	12	1	u	1	1	0.894565	22	23	1.04	1.04	2	day2	1
BM2_673	0	2	2	2	38	177	Nutterbutter.bmp	Funyuns_small.bmp	13	14	1	i	2	0	0.997315	29	28	1.02	1.02	2	day2	1
BM2_673	0	2	2	2	39	181	FlamingCheetos.bmp	Funyuns_small.bmp	13	14	1	u	2	1	0.970044	27	28	1.026667	1.02	2	day2	1
BM2_673	0	2	2	2	40	187	FigNewton_small.bmp	Sourpatch.bmp	11	12	1	i	1	0	0.728815	19	21	1.053333	1.046667	2	day2	1
BM2_673	0	2	2	2	41	192	Cupcakes.bmp	Twinkie.bmp	21	22	1	u	3	1	0.554642	6	9	1.446667	1.4	2	day2	1
BM2_673	0	2	2	2	42	202	Skittles.bmp	Funyuns_small.bmp	13	14	1	u	2	1	0.837425	26	28	1.033333	1.02	2	day2	1
BM2_673	0	2	2	2	43	212	MilkyWay.bmp	Snickers.bmp	24	23	0	i	4	1	1.288953	16	12	1.193333	1.353333	2	day2	1
BM2_673	0	2	2	2	44	220	Twinkie.bmp	Twix.bmp	22	21	0	i	3	1	0.649658	9	5	1.4	1.486667	2	day2	1
BM2_673	0	2	2	2	45	224	Laysclassic.bmp	FigNewton_small.bmp	12	11	0	u	1	0	1.174466	23	19	1.04	1.053333	2	day2	1
BM2_673	0	2	2	2	46	227	PopTartsCinnamon.bmp	SourSkittles.bmp	11	12	1	i	1	0	0.814227	20	17	1.046667	1.193333	2	day2	1
BM2_673	0	2	2	2	47	230	Laysclassic.bmp	PopTartsCinnamon.bmp	12	11	0	u	1	0	0.693254	23	20	1.04	1.046667	2	day2	1
BM2_673	0	2	2	2	48	233	Ghiradelli_milk.bmp	KitKat_small.bmp	23	24	1	i	4	0	0.468997	15	14	1.24	1.286667	2	day2	1
BM2_673	0	2	2	2	49	241	FamousAmos_small.bmp	Ghiradelli_milk_Almonds.bmp	23	24	1	u	4	1	0.80579	13	10	1.34	1.393333	2	day2	1
BM2_673	0	2	2	2	50	244	3Musketeers.bmp	Sourpatch.bmp	11	12	1	x	1	NA	NA	22	21	1.04	1.046667	2	day2	1
BM2_673	0	2	2	2	51	252	Twinkie.bmp	Riprolls.bmp	22	21	0	i	3	1	0.582267	9	8	1.4	1.433333	2	day2	1
BM2_673	0	2	2	2	52	259	Nutterbutter.bmp	Dots_one.bmp	13	14	1	i	2	0	0.690074	29	30	1.02	1.013333	2	day2	1
BM2_673	0	2	2	2	53	262	BabyRuth.bmp	Nutterbutter.bmp	14	13	0	u	2	0	0.705845	24	29	1.033333	1.02	2	day2	1
BM2_673	0	2	2	2	54	269	Dots_one.bmp	Skittles.bmp	14	13	0	u	2	0	0.917618	30	26	1.013333	1.033333	2	day2	1
BM2_673	0	2	2	2	55	273	MilkyWay.bmp	FamousAmos_small.bmp	24	23	0	i	4	1	1.169759	16	13	1.193333	1.34	2	day2	1
BM2_673	0	2	2	2	56	282	KitKat_small.bmp	FamousAmos_small.bmp	24	23	0	i	4	1	1.232868	14	13	1.286667	1.34	2	day2	1
BM2_673	0	2	2	2	57	286	FlamingCheetos.bmp	Dots_one.bmp	13	14	1	i	2	0	1.076917	27	30	1.026667	1.013333	2	day2	1
BM2_673	0	2	2	2	58	300	Sourpatch.bmp	PopTartsCinnamon.bmp	12	11	0	u	1	0	0.813182	21	20	1.046667	1.046667	2	day2	1
BM2_673	0	2	2	2	59	303	BabyRuth.bmp	FlamingCheetos.bmp	14	13	0	i	2	1	0.732214	24	27	1.033333	1.026667	2	day2	1
BM2_673	0	2	2	2	60	306	Granolabar.bmp	Riprolls.bmp	22	21	0	i	3	1	0.579884	7	8	1.44	1.433333	2	day2	1
BM2_673	0	2	2	2	61	309	3Musketeers.bmp	SourSkittles.bmp	11	12	1	u	1	1	1.026905	22	17	1.04	1.193333	2	day2	1
BM2_673	0	2	2	2	62	312	Cupcakes.bmp	MrGoodbar.bmp	21	22	1	u	3	1	1.37786	6	3	1.446667	1.593333	2	day2	1
BM2_673	0	2	2	2	63	315	MrGoodbar.bmp	Riprolls.bmp	22	21	0	u	3	0	0.682434	3	8	1.593333	1.433333	2	day2	1
BM2_673	0	2	2	2	64	318	MrGoodbar.bmp	Twix.bmp	22	21	0	u	3	0	0.905429	3	5	1.593333	1.486667	2	day2	1
BM2_673	0	2	2	2	65	324	Granolabar.bmp	Twix.bmp	22	21	0	i	3	1	0.600219	7	5	1.44	1.486667	2	day2	1
BM2_673	0	2	2	2	66	328	Ghiradelli_milk_Almonds.bmp	Ghiradelli_milk.bmp	24	23	0	u	4	0	0.965001	10	15	1.393333	1.24	2	day2	1
BM2_673	0	2	2	2	67	333	KitKat_small.bmp	Snickers.bmp	24	23	0	u	4	0	1.01477	14	12	1.286667	1.353333	2	day2	1
BM2_673	0	2	2	2	68	339	Skittles.bmp	BabyRuth.bmp	13	14	1	u	2	1	1.045444	26	24	1.033333	1.033333	2	day2	1
BM2_673	0	2	2	2	69	342	Ghiradelli_milk_Almonds.bmp	Snickers.bmp	24	23	0	i	4	1	0.972598	10	12	1.393333	1.353333	2	day2	1
BM2_673	0	2	2	2	70	345	FigNewton_small.bmp	SourSkittles.bmp	11	12	1	i	1	0	0.74832	19	17	1.053333	1.193333	2	day2	1
BM2_673	0	2	2	2	71	349	Cupcakes.bmp	Granolabar.bmp	21	22	1	u	3	1	0.561058	6	7	1.446667	1.44	2	day2	1
BM2_673	0	2	2	2	72	352	Ghiradelli_milk.bmp	MilkyWay.bmp	23	24	1	i	4	0	0.560094	15	16	1.24	1.193333	2	day2	1
BM2_674	0	1	1	1	1	0	Milano.bmp	Streusel.bmp	14	13	0	i	2	1	0.819531	15	10	1.506667	1.746667	2	day2	1
BM2_674	0	1	1	1	2	9	Snickers.bmp	Toberlorone.bmp	23	24	1	u	4	1	1.034692	28	29	1.293333	1.293333	2	day2	1
BM2_674	0	1	1	1	3	12	Goldfish.bmp	Cheezits.bmp	12	11	0	u	1	0	0.993712	8	9	1.793333	1.753333	2	day2	1
BM2_674	0	1	1	1	4	17	Cupcakes.bmp	FrootLoops.bmp	13	14	1	i	2	0	0.93149	14	13	1.506667	1.546667	2	day2	1
BM2_674	0	1	1	1	5	26	Ghiradelli_milk_Almonds.bmp	Toberlorone.bmp	23	24	1	u	4	1	1.170062	24	29	1.313333	1.293333	2	day2	1
BM2_674	0	1	1	1	6	32	PeanutMMs.bmp	Ghiradelli_milk_Almonds.bmp	24	23	0	u	4	0	1.352832	27	24	1.293333	1.313333	2	day2	1
BM2_674	0	1	1	1	7	35	Twinkie.bmp	100grand_small.bmp	21	22	1	i	3	0	1.119871	23	22	1.353333	1.386667	2	day2	1
BM2_674	0	1	1	1	8	48	Whatchamacallit.bmp	FlamingCheetos.bmp	21	22	1	u	3	1	1.387139	21	20	1.446667	1.493333	2	day2	1
BM2_674	0	1	1	1	9	58	Cheezits.bmp	PringlesRed.bmp	11	12	1	i	1	0	0.74264	9	6	1.753333	1.98	2	day2	1
BM2_674	0	1	1	1	10	63	AnimalCrackers.bmp	Nutterbutter.bmp	12	11	0	u	1	0	0.807695	5	3	1.986667	2	2	day2	1
BM2_674	0	1	1	1	11	66	Streusel.bmp	FrootLoops.bmp	13	14	1	u	2	1	0.887171	10	13	1.746667	1.546667	2	day2	1
BM2_674	0	1	1	1	12	69	PeanutMMs.bmp	Snickers.bmp	24	23	0	u	4	0	1.014439	27	28	1.293333	1.293333	2	day2	1
BM2_674	0	1	1	1	13	72	Granolabar.bmp	ChipsAhoy_small.bmp	14	13	0	u	2	0	0.934199	12	16	1.726667	1.5	2	day2	1
BM2_674	0	1	1	1	14	82	Whatchamacallit.bmp	100grand_small.bmp	21	22	1	u	3	1	1.009714	21	22	1.446667	1.386667	2	day2	1
BM2_674	0	1	1	1	15	85	FigNewton_small.bmp	Goldfish.bmp	11	12	1	u	1	1	0.944726	7	8	1.866667	1.793333	2	day2	1
BM2_674	0	1	1	1	16	95	Milkduds.bmp	Ghiradelli_milk_Almonds.bmp	24	23	0	u	4	0	1.07619	26	24	1.293333	1.313333	2	day2	1
BM2_674	0	1	1	1	17	98	Whatchamacallit.bmp	Funyuns_small.bmp	21	22	1	u	3	1	0.723942	21	19	1.446667	1.5	2	day2	1
BM2_674	0	1	1	1	18	101	Granolabar.bmp	Cupcakes.bmp	14	13	0	u	2	0	0.787001	12	14	1.726667	1.506667	2	day2	1
BM2_674	0	1	1	1	19	105	FigNewton_small.bmp	PringlesRed.bmp	11	12	1	i	1	0	0.991178	7	6	1.866667	1.98	2	day2	1
BM2_674	0	1	1	1	20	109	Milkduds.bmp	CheesyDoritos.bmp	24	23	0	i	4	1	1.37254	26	30	1.293333	1.28	2	day2	1
BM2_674	0	1	1	1	21	113	FlamingCheetos.bmp	Twinkie.bmp	22	21	0	x	3	NA	NA	20	23	1.493333	1.353333	2	day2	1
BM2_674	0	1	1	1	22	119	PeanutMMs.bmp	CheesyDoritos.bmp	24	23	0	u	4	0	0.93525	27	30	1.293333	1.28	2	day2	1
BM2_674	0	1	1	1	23	123	Milano.bmp	ChipsAhoy_small.bmp	14	13	0	i	2	1	1.30802	15	16	1.506667	1.5	2	day2	1
BM2_674	0	1	1	1	24	132	Streusel.bmp	Granolabar.bmp	13	14	1	i	2	0	0.706592	10	12	1.746667	1.726667	2	day2	1
BM2_674	0	1	1	1	25	140	FrootLoops.bmp	ChipsAhoy_small.bmp	14	13	0	i	2	1	0.707392	13	16	1.546667	1.5	2	day2	1
BM2_674	0	1	1	1	26	144	FlamingCheetos.bmp	Doritosranch.bmp	22	21	0	i	3	1	0.975028	20	17	1.493333	1.5	2	day2	1
BM2_674	0	1	1	1	27	147	Cheezits.bmp	AnimalCrackers.bmp	11	12	1	i	1	0	0.663101	9	5	1.753333	1.986667	2	day2	1
BM2_674	0	1	1	1	28	151	Snickers.bmp	Milkduds.bmp	23	24	1	i	4	0	0.931912	28	26	1.293333	1.293333	2	day2	1
BM2_674	0	1	1	1	29	154	PringlesRed.bmp	Nutterbutter.bmp	12	11	0	u	1	0	0.939647	6	3	1.98	2	2	day2	1
BM2_674	0	1	1	1	30	158	Cupcakes.bmp	Milano.bmp	13	14	1	i	2	0	1.071693	14	15	1.506667	1.506667	2	day2	1
BM2_674	0	1	1	1	31	161	FigNewton_small.bmp	AnimalCrackers.bmp	11	12	1	i	1	0	0.950722	7	5	1.866667	1.986667	2	day2	1
BM2_674	0	1	1	1	32	167	Funyuns_small.bmp	Doritosranch.bmp	22	21	0	i	3	1	0.982198	19	17	1.5	1.5	2	day2	1
BM2_674	0	1	1	1	33	170	CheesyDoritos.bmp	Toberlorone.bmp	23	24	1	u	4	1	0.829853	30	29	1.28	1.293333	2	day2	1
BM2_674	0	1	1	1	34	174	100grand_small.bmp	Doritosranch.bmp	22	21	0	i	3	1	0.769894	22	17	1.386667	1.5	2	day2	1
BM2_674	0	1	1	1	35	179	Goldfish.bmp	Nutterbutter.bmp	12	11	0	i	1	1	0.867741	8	3	1.793333	2	2	day2	1
BM2_674	0	1	1	1	36	182	Twinkie.bmp	Funyuns_small.bmp	21	22	1	u	3	1	0.99547	23	19	1.353333	1.5	2	day2	1
BM2_674	0	1	1	2	37	185	Cupcakes.bmp	Granolabar.bmp	13	14	1	i	2	0	0.722467	14	12	1.506667	1.726667	2	day2	1
BM2_674	0	1	1	2	38	188	Whatchamacallit.bmp	100grand_small.bmp	21	22	1	u	3	1	0.706158	21	22	1.446667	1.386667	2	day2	1
BM2_674	0	1	1	2	39	191	Milkduds.bmp	Ghiradelli_milk_Almonds.bmp	24	23	0	i	4	1	1.097193	26	24	1.293333	1.313333	2	day2	1
BM2_674	0	1	1	2	40	195	PringlesRed.bmp	Nutterbutter.bmp	12	11	0	u	1	0	1.086027	6	3	1.98	2	2	day2	1
BM2_674	0	1	1	2	41	200	Goldfish.bmp	Cheezits.bmp	12	11	0	u	1	0	1.143239	8	9	1.793333	1.753333	2	day2	1
BM2_674	0	1	1	2	42	204	FrootLoops.bmp	Streusel.bmp	14	13	0	i	2	1	0.70853	13	10	1.546667	1.746667	2	day2	1
BM2_674	0	1	1	2	43	208	Doritosranch.bmp	FlamingCheetos.bmp	21	22	1	u	3	1	1.288563	17	20	1.5	1.493333	2	day2	1
BM2_674	0	1	1	2	44	212	PeanutMMs.bmp	Ghiradelli_milk_Almonds.bmp	24	23	0	u	4	0	1.173321	27	24	1.293333	1.313333	2	day2	1
BM2_674	0	1	1	2	45	218	AnimalCrackers.bmp	Cheezits.bmp	12	11	0	u	1	0	0.940022	5	9	1.986667	1.753333	2	day2	1
BM2_674	0	1	1	2	46	224	Nutterbutter.bmp	AnimalCrackers.bmp	11	12	1	i	1	0	0.810904	3	5	2	1.986667	2	day2	1
BM2_674	0	1	1	2	47	229	Funyuns_small.bmp	Twinkie.bmp	22	21	0	i	3	1	0.812614	19	23	1.5	1.353333	2	day2	1
BM2_674	0	1	1	2	48	236	ChipsAhoy_small.bmp	Milano.bmp	13	14	1	u	2	1	1.000387	16	15	1.5	1.506667	2	day2	1
BM2_674	0	1	1	2	49	240	Granolabar.bmp	Streusel.bmp	14	13	0	u	2	0	0.725137	12	10	1.726667	1.746667	2	day2	1
BM2_674	0	1	1	2	50	250	Goldfish.bmp	FigNewton_small.bmp	12	11	0	i	1	1	0.768657	8	7	1.793333	1.866667	2	day2	1
BM2_674	0	1	1	2	51	260	PeanutMMs.bmp	Snickers.bmp	24	23	0	u	4	0	0.932167	27	28	1.293333	1.293333	2	day2	1
BM2_674	0	1	1	2	52	264	FrootLoops.bmp	ChipsAhoy_small.bmp	14	13	0	i	2	1	0.736207	13	16	1.546667	1.5	2	day2	1
BM2_674	0	1	1	2	53	271	Toberlorone.bmp	Snickers.bmp	24	23	0	i	4	1	0.908692	29	28	1.293333	1.293333	2	day2	1
BM2_674	0	1	1	2	54	275	Cheezits.bmp	PringlesRed.bmp	11	12	1	i	1	0	1.000733	9	6	1.753333	1.98	2	day2	1
BM2_674	0	1	1	2	55	279	Goldfish.bmp	Nutterbutter.bmp	12	11	0	i	1	1	0.909496	8	3	1.793333	2	2	day2	1
BM2_674	0	1	1	2	56	283	Streusel.bmp	Milano.bmp	13	14	1	u	2	1	1.02623	10	15	1.746667	1.506667	2	day2	1
BM2_674	0	1	1	2	57	286	FrootLoops.bmp	Cupcakes.bmp	14	13	0	u	2	0	1.113174	13	14	1.546667	1.506667	2	day2	1
BM2_674	0	1	1	2	58	289	Funyuns_small.bmp	Doritosranch.bmp	22	21	0	i	3	1	0.800997	19	17	1.5	1.5	2	day2	1
BM2_674	0	1	1	2	59	293	Twinkie.bmp	100grand_small.bmp	21	22	1	u	3	1	1.053757	23	22	1.353333	1.386667	2	day2	1
BM2_674	0	1	1	2	60	296	Whatchamacallit.bmp	FlamingCheetos.bmp	21	22	1	u	3	1	0.956722	21	20	1.446667	1.493333	2	day2	1
BM2_674	0	1	1	2	61	299	Milkduds.bmp	CheesyDoritos.bmp	24	23	0	i	4	1	0.764434	26	30	1.293333	1.28	2	day2	1
BM2_674	0	1	1	2	62	306	Doritosranch.bmp	100grand_small.bmp	21	22	1	u	3	1	1.00029	17	22	1.5	1.386667	2	day2	1
BM2_674	0	1	1	2	63	311	FigNewton_small.bmp	PringlesRed.bmp	11	12	1	u	1	1	1.042055	7	6	1.866667	1.98	2	day2	1
BM2_674	0	1	1	2	64	317	Milano.bmp	Cupcakes.bmp	14	13	0	u	2	0	0.768822	15	14	1.506667	1.506667	2	day2	1
BM2_674	0	1	1	2	65	320	Ghiradelli_milk_Almonds.bmp	Toberlorone.bmp	23	24	1	u	4	1	1.007856	24	29	1.313333	1.293333	2	day2	1
BM2_674	0	1	1	2	66	324	CheesyDoritos.bmp	PeanutMMs.bmp	23	24	1	i	4	0	0.740537	30	27	1.28	1.293333	2	day2	1
BM2_674	0	1	1	2	67	327	Funyuns_small.bmp	Whatchamacallit.bmp	22	21	0	i	3	1	0.764334	19	21	1.5	1.446667	2	day2	1
BM2_674	0	1	1	2	68	330	Snickers.bmp	Milkduds.bmp	23	24	1	u	4	1	0.859367	28	26	1.293333	1.293333	2	day2	1
BM2_674	0	1	1	2	69	333	ChipsAhoy_small.bmp	Granolabar.bmp	13	14	1	i	2	0	0.891109	16	12	1.5	1.726667	2	day2	1
BM2_674	0	1	1	2	70	341	CheesyDoritos.bmp	Toberlorone.bmp	23	24	1	u	4	1	0.795892	30	29	1.28	1.293333	2	day2	1
BM2_674	0	1	1	2	71	344	FigNewton_small.bmp	AnimalCrackers.bmp	11	12	1	i	1	0	0.787633	7	5	1.866667	1.986667	2	day2	1
BM2_674	0	1	1	2	72	352	Twinkie.bmp	FlamingCheetos.bmp	21	22	1	u	3	1	1.028424	23	20	1.353333	1.493333	2	day2	1
BM2_675	0	2	1	1	1	0	Funyuns_small.bmp	Snickers.bmp	23	24	1	i	4	0	0.619899	14	15	1.513333	1.513333	2	day2	1
BM2_675	0	2	1	1	2	9	SnoBall.bmp	HoHo.bmp	13	14	1	u	2	1	1.195555	24	27	1.293333	1.253333	2	day2	1
BM2_675	0	2	1	1	3	12	Ghiradelli_milk.bmp	Granolabar.bmp	21	22	1	u	3	1	0.626555	3	5	2.253333	2.02	2	day2	1
BM2_675	0	2	1	1	4	17	BabyRuth.bmp	Slimjim.bmp	12	11	0	u	1	0	0.684259	20	17	1.48	1.506667	2	day2	1
BM2_675	0	2	1	1	5	26	Keeblerfudgestripes.bmp	Chocolate_mm.bmp	22	21	0	i	3	1	0.634823	6	9	2.02	1.706667	2	day2	1
BM2_675	0	2	1	1	6	32	KitKat_small.bmp	Almondjoy.bmp	23	24	1	i	4	0	0.897627	10	12	1.54	1.52	2	day2	1
BM2_675	0	2	1	1	7	35	Cupcakes.bmp	MrGoodbar.bmp	12	11	0	i	1	1	0.856651	22	21	1.4	1.453333	2	day2	1
BM2_675	0	2	1	1	8	48	PopTartsCinnamon.bmp	Streusel.bmp	13	14	1	u	2	1	0.987912	28	29	1.253333	1.246667	2	day2	1
BM2_675	0	2	1	1	9	58	Oreos.bmp	MrGoodbar.bmp	12	11	0	u	1	0	1.023418	19	21	1.493333	1.453333	2	day2	1
BM2_675	0	2	1	1	10	63	Goldfish.bmp	HoHo.bmp	13	14	1	i	2	0	0.76042	30	27	1.24	1.253333	2	day2	1
BM2_675	0	2	1	1	11	66	KitKat_small.bmp	Laysclassic.bmp	23	24	1	u	4	1	0.767073	10	13	1.54	1.52	2	day2	1
BM2_675	0	2	1	1	12	69	FamousAmos_small.bmp	Snickers.bmp	23	24	1	i	4	0	1.03923	16	15	1.506667	1.513333	2	day2	1
BM2_675	0	2	1	1	13	72	Oreos.bmp	Slimjim.bmp	12	11	0	u	1	0	0.630965	19	17	1.493333	1.506667	2	day2	1
BM2_675	0	2	1	1	14	82	ChipsAhoy_small.bmp	Chocolate_mm.bmp	22	21	0	i	3	1	0.874468	8	9	2.006667	1.706667	2	day2	1
BM2_675	0	2	1	1	15	85	Chocolate_mm.bmp	Granolabar.bmp	21	22	1	u	3	1	0.673457	9	5	1.706667	2.02	2	day2	1
BM2_675	0	2	1	1	16	95	Almondjoy.bmp	Funyuns_small.bmp	24	23	0	u	4	0	0.62104	12	14	1.52	1.513333	2	day2	1
BM2_675	0	2	1	1	17	98	AnimalCrackers.bmp	Goldfish.bmp	14	13	0	i	2	1	0.756774	26	30	1.26	1.24	2	day2	1
BM2_675	0	2	1	1	18	101	SnoBall.bmp	Streusel.bmp	13	14	1	u	2	1	1.043839	24	29	1.293333	1.246667	2	day2	1
BM2_675	0	2	1	1	19	105	BabyRuth.bmp	MrGoodbar.bmp	12	11	0	i	1	1	1.016555	20	21	1.48	1.453333	2	day2	1
BM2_675	0	2	1	1	20	109	Oreos.bmp	RitzBitz2.bmp	12	11	0	u	1	0	0.901303	19	23	1.493333	1.293333	2	day2	1
BM2_675	0	2	1	1	21	113	Ghiradelli_milk.bmp	ChipsAhoy_small.bmp	21	22	1	u	3	1	0.969347	3	8	2.253333	2.006667	2	day2	1
BM2_675	0	2	1	1	22	119	Keeblerfudgestripes.bmp	Nutterbutter.bmp	22	21	0	i	3	1	0.736113	6	7	2.02	2.013333	2	day2	1
BM2_675	0	2	1	1	23	123	PopTartsCinnamon.bmp	HoHo.bmp	13	14	1	u	2	1	0.796836	28	27	1.253333	1.253333	2	day2	1
BM2_675	0	2	1	1	24	132	KitKat_small.bmp	Snickers.bmp	23	24	1	u	4	1	0.931332	10	15	1.54	1.513333	2	day2	1
BM2_675	0	2	1	1	25	140	FamousAmos_small.bmp	Almondjoy.bmp	23	24	1	i	4	0	0.90007	16	12	1.506667	1.52	2	day2	1
BM2_675	0	2	1	1	26	144	Streusel.bmp	Goldfish.bmp	14	13	0	u	2	0	1.264898	29	30	1.246667	1.24	2	day2	1
BM2_675	0	2	1	1	27	147	RitzBitz2.bmp	BabyRuth.bmp	11	12	1	i	1	0	0.823918	23	20	1.293333	1.48	2	day2	1
BM2_675	0	2	1	1	28	151	Nutterbutter.bmp	Granolabar.bmp	21	22	1	u	3	1	0.676669	7	5	2.013333	2.02	2	day2	1
BM2_675	0	2	1	1	29	154	Laysclassic.bmp	FamousAmos_small.bmp	24	23	0	i	4	1	0.604419	13	16	1.52	1.506667	2	day2	1
BM2_675	0	2	1	1	30	158	AnimalCrackers.bmp	PopTartsCinnamon.bmp	14	13	0	i	2	1	0.928449	26	28	1.26	1.253333	2	day2	1
BM2_675	0	2	1	1	31	161	AnimalCrackers.bmp	SnoBall.bmp	14	13	0	i	2	1	1.006925	26	24	1.26	1.293333	2	day2	1
BM2_675	0	2	1	1	32	167	Laysclassic.bmp	Funyuns_small.bmp	24	23	0	i	4	1	1.278961	13	14	1.52	1.513333	2	day2	1
BM2_675	0	2	1	1	33	170	Cupcakes.bmp	Slimjim.bmp	12	11	0	u	1	0	0.726701	22	17	1.4	1.506667	2	day2	1
BM2_675	0	2	1	1	34	174	Ghiradelli_milk.bmp	Keeblerfudgestripes.bmp	21	22	1	u	3	1	0.650713	3	6	2.253333	2.02	2	day2	1
BM2_675	0	2	1	1	35	179	ChipsAhoy_small.bmp	Nutterbutter.bmp	22	21	0	i	3	1	0.860476	8	7	2.006667	2.013333	2	day2	1
BM2_675	0	2	1	1	36	182	RitzBitz2.bmp	Cupcakes.bmp	11	12	1	i	1	0	1.060193	23	22	1.293333	1.4	2	day2	1
BM2_675	0	2	1	2	37	185	SnoBall.bmp	HoHo.bmp	13	14	1	u	2	1	0.827258	24	27	1.293333	1.253333	2	day2	1
BM2_675	0	2	1	2	38	188	PopTartsCinnamon.bmp	HoHo.bmp	13	14	1	u	2	1	0.930991	28	27	1.253333	1.253333	2	day2	1
BM2_675	0	2	1	2	39	191	Cupcakes.bmp	RitzBitz2.bmp	12	11	0	u	1	0	0.977944	22	23	1.4	1.293333	2	day2	1
BM2_675	0	2	1	2	40	195	Granolabar.bmp	Nutterbutter.bmp	22	21	0	i	3	1	0.670747	5	7	2.02	2.013333	2	day2	1
BM2_675	0	2	1	2	41	200	Snickers.bmp	FamousAmos_small.bmp	24	23	0	u	4	0	0.927608	15	16	1.513333	1.506667	2	day2	1
BM2_675	0	2	1	2	42	204	AnimalCrackers.bmp	PopTartsCinnamon.bmp	14	13	0	i	2	1	0.741196	26	28	1.26	1.253333	2	day2	1
BM2_675	0	2	1	2	43	208	Chocolate_mm.bmp	Keeblerfudgestripes.bmp	21	22	1	u	3	1	0.721248	9	6	1.706667	2.02	2	day2	1
BM2_675	0	2	1	2	44	212	Slimjim.bmp	Cupcakes.bmp	11	12	1	i	1	0	0.566074	17	22	1.506667	1.4	2	day2	1
BM2_675	0	2	1	2	45	218	RitzBitz2.bmp	Oreos.bmp	11	12	1	i	1	0	0.812855	23	19	1.293333	1.493333	2	day2	1
BM2_675	0	2	1	2	46	224	Snickers.bmp	Funyuns_small.bmp	24	23	0	u	4	0	0.843607	15	14	1.513333	1.513333	2	day2	1
BM2_675	0	2	1	2	47	229	SnoBall.bmp	Streusel.bmp	13	14	1	u	2	1	1.173414	24	29	1.293333	1.246667	2	day2	1
BM2_675	0	2	1	2	48	236	Goldfish.bmp	Streusel.bmp	13	14	1	i	2	0	1.065156	30	29	1.24	1.246667	2	day2	1
BM2_675	0	2	1	2	49	240	Nutterbutter.bmp	ChipsAhoy_small.bmp	21	22	1	u	3	1	0.901889	7	8	2.013333	2.006667	2	day2	1
BM2_675	0	2	1	2	50	250	Oreos.bmp	Slimjim.bmp	12	11	0	u	1	0	0.881401	19	17	1.493333	1.506667	2	day2	1
BM2_675	0	2	1	2	51	260	KitKat_small.bmp	Snickers.bmp	23	24	1	i	4	0	0.892908	10	15	1.54	1.513333	2	day2	1
BM2_675	0	2	1	2	52	264	HoHo.bmp	Goldfish.bmp	14	13	0	u	2	0	0.928941	27	30	1.253333	1.24	2	day2	1
BM2_675	0	2	1	2	53	271	BabyRuth.bmp	Slimjim.bmp	12	11	0	u	1	0	0.725396	20	17	1.48	1.506667	2	day2	1
BM2_675	0	2	1	2	54	275	RitzBitz2.bmp	BabyRuth.bmp	11	12	1	i	1	0	1.02545	23	20	1.293333	1.48	2	day2	1
BM2_675	0	2	1	2	55	279	AnimalCrackers.bmp	Goldfish.bmp	14	13	0	u	2	0	1.398153	26	30	1.26	1.24	2	day2	1
BM2_675	0	2	1	2	56	283	KitKat_small.bmp	Almondjoy.bmp	23	24	1	i	4	0	0.850976	10	12	1.54	1.52	2	day2	1
BM2_675	0	2	1	2	57	286	Granolabar.bmp	Ghiradelli_milk.bmp	22	21	0	i	3	1	0.626004	5	3	2.02	2.253333	2	day2	1
BM2_675	0	2	1	2	58	289	Granolabar.bmp	Chocolate_mm.bmp	22	21	0	i	3	1	0.569699	5	9	2.02	1.706667	2	day2	1
BM2_675	0	2	1	2	59	293	MrGoodbar.bmp	Cupcakes.bmp	11	12	1	u	1	1	0.702409	21	22	1.453333	1.4	2	day2	1
BM2_675	0	2	1	2	60	296	Streusel.bmp	PopTartsCinnamon.bmp	14	13	0	i	2	1	0.70951	29	28	1.246667	1.253333	2	day2	1
BM2_675	0	2	1	2	61	299	MrGoodbar.bmp	BabyRuth.bmp	11	12	1	u	1	1	0.781201	21	20	1.453333	1.48	2	day2	1
BM2_675	0	2	1	2	62	306	Laysclassic.bmp	Funyuns_small.bmp	24	23	0	i	4	1	0.929031	13	14	1.52	1.513333	2	day2	1
BM2_675	0	2	1	2	63	311	Ghiradelli_milk.bmp	Keeblerfudgestripes.bmp	21	22	1	u	3	1	0.594789	3	6	2.253333	2.02	2	day2	1
BM2_675	0	2	1	2	64	317	SnoBall.bmp	AnimalCrackers.bmp	13	14	1	u	2	1	0.897575	24	26	1.293333	1.26	2	day2	1
BM2_675	0	2	1	2	65	320	Keeblerfudgestripes.bmp	Nutterbutter.bmp	22	21	0	i	3	1	0.600587	6	7	2.02	2.013333	2	day2	1
BM2_675	0	2	1	2	66	324	Funyuns_small.bmp	Almondjoy.bmp	23	24	1	i	4	0	0.71728	14	12	1.513333	1.52	2	day2	1
BM2_675	0	2	1	2	67	327	Oreos.bmp	MrGoodbar.bmp	12	11	0	u	1	0	0.541048	19	21	1.493333	1.453333	2	day2	1
BM2_675	0	2	1	2	68	330	FamousAmos_small.bmp	Laysclassic.bmp	23	24	1	u	4	1	0.780052	16	13	1.506667	1.52	2	day2	1
BM2_675	0	2	1	2	69	333	ChipsAhoy_small.bmp	Ghiradelli_milk.bmp	22	21	0	i	3	1	0.55583	8	3	2.006667	2.253333	2	day2	1
BM2_675	0	2	1	2	70	341	Almondjoy.bmp	FamousAmos_small.bmp	24	23	0	u	4	0	0.820563	12	16	1.52	1.506667	2	day2	1
BM2_675	0	2	1	2	71	344	Chocolate_mm.bmp	ChipsAhoy_small.bmp	21	22	1	u	3	1	0.732356	9	8	1.706667	2.006667	2	day2	1
BM2_675	0	2	1	2	72	352	Laysclassic.bmp	KitKat_small.bmp	24	23	0	i	4	1	0.605145	13	10	1.52	1.54	2	day2	1
BM2_677	0	2	2	1	1	0	ChipsAhoy_small.bmp	3Musketeers.bmp	24	23	0	i	4	1	0.761934	16	12	1.7	1.78	2	day2	1
BM2_677	0	2	2	1	2	10	Goldfish.bmp	FamousAmos_small.bmp	12	11	0	i	1	1	1.12558	17	22	1.7	1.526667	2	day2	1
BM2_677	0	2	2	1	3	13	Laffytaffyred_one.bmp	Dots_one.bmp	12	11	0	i	1	1	0.96553	23	19	1.493333	1.68	2	day2	1
BM2_677	0	2	2	1	4	16	Snickers.bmp	TeddyGrahamschocolate.bmp	13	14	1	u	2	1	0.757276	26	28	1.406667	1.32	2	day2	1
BM2_677	0	2	2	1	5	20	MrGoodbar.bmp	Riprolls.bmp	11	12	1	i	1	0	1.145992	20	21	1.64	1.626667	2	day2	1
BM2_677	0	2	2	1	6	24	BabyRuth.bmp	TeddyGrahamschocolate.bmp	13	14	1	x	2	NA	NA	29	28	1.293333	1.32	2	day2	1
BM2_677	0	2	2	1	7	28	3Musketeers.bmp	FigNewton_small.bmp	23	24	1	u	4	1	0.650769	12	10	1.78	1.953333	2	day2	1
BM2_677	0	2	2	1	8	32	FamousAmos_small.bmp	Riprolls.bmp	11	12	1	i	1	0	0.735536	22	21	1.526667	1.626667	2	day2	1
BM2_677	0	2	2	1	9	38	Goldfish.bmp	MrGoodbar.bmp	12	11	0	i	1	1	0.821763	17	20	1.7	1.64	2	day2	1
BM2_677	0	2	2	1	10	42	Ghiradelli_milk_Almonds.bmp	Snickers.bmp	14	13	0	i	2	1	0.603004	30	26	1.28	1.406667	2	day2	1
BM2_677	0	2	2	1	11	45	Nutterbutter.bmp	Ghiradelli_milk_Almonds.bmp	13	14	1	u	2	1	0.730129	27	30	1.393333	1.28	2	day2	1
BM2_677	0	2	2	1	12	48	Dots_one.bmp	Goldfish.bmp	11	12	1	u	1	1	0.873802	19	17	1.68	1.7	2	day2	1
BM2_677	0	2	2	1	13	52	ChipsAhoy_small.bmp	PeanutMMs.bmp	24	23	0	i	4	1	0.661841	16	13	1.7	1.78	2	day2	1
BM2_677	0	2	2	1	14	61	Whatchamacallit.bmp	3Musketeers.bmp	24	23	0	i	4	1	0.572428	14	12	1.713333	1.78	2	day2	1
BM2_677	0	2	2	1	15	68	KitKat_small.bmp	Sourpatch.bmp	21	22	1	i	3	0	0.712186	6	3	1.98	2.073333	2	day2	1
BM2_677	0	2	2	1	16	73	Riprolls.bmp	Dots_one.bmp	12	11	0	u	1	0	0.977943	21	19	1.626667	1.68	2	day2	1
BM2_677	0	2	2	1	17	77	FrootLoops.bmp	PopTartsCinnamon.bmp	22	21	0	i	3	1	0.733495	9	5	1.966667	1.986667	2	day2	1
BM2_677	0	2	2	1	18	80	PeanutMMs.bmp	FigNewton_small.bmp	23	24	1	u	4	1	0.701715	13	10	1.78	1.953333	2	day2	1
BM2_677	0	2	2	1	19	84	MilkyWay.bmp	Milano.bmp	21	22	1	u	3	1	0.666482	8	7	1.973333	1.973333	2	day2	1
BM2_677	0	2	2	1	20	93	MilkyWay.bmp	Sourpatch.bmp	21	22	1	i	3	0	0.672975	8	3	1.973333	2.073333	2	day2	1
BM2_677	0	2	2	1	21	98	Ghiradelli_milk_Almonds.bmp	BabyRuth.bmp	14	13	0	u	2	0	0.730733	30	29	1.28	1.293333	2	day2	1
BM2_677	0	2	2	1	22	101	Skittles.bmp	BabyRuth.bmp	14	13	0	u	2	0	0.729765	24	29	1.493333	1.293333	2	day2	1
BM2_677	0	2	2	1	23	104	Sourpatch.bmp	PopTartsCinnamon.bmp	22	21	0	u	3	0	0.657514	3	5	2.073333	1.986667	2	day2	1
BM2_677	0	2	2	1	24	108	Laffytaffyred_one.bmp	MrGoodbar.bmp	12	11	0	i	1	1	1.221534	23	20	1.493333	1.64	2	day2	1
BM2_677	0	2	2	1	25	111	KitKat_small.bmp	Milano.bmp	21	22	1	i	3	0	1.02925	6	7	1.98	1.973333	2	day2	1
BM2_677	0	2	2	1	26	114	ChipsAhoy_small.bmp	RitzBitz2.bmp	24	23	0	u	4	0	0.845003	16	15	1.7	1.706667	2	day2	1
BM2_677	0	2	2	1	27	123	RitzBitz2.bmp	Whatchamacallit.bmp	23	24	1	u	4	1	0.810772	15	14	1.706667	1.713333	2	day2	1
BM2_677	0	2	2	1	28	126	Nutterbutter.bmp	Skittles.bmp	13	14	1	i	2	0	0.658502	27	24	1.393333	1.493333	2	day2	1
BM2_677	0	2	2	1	29	130	Laffytaffyred_one.bmp	FamousAmos_small.bmp	12	11	0	i	1	1	0.894596	23	22	1.493333	1.526667	2	day2	1
BM2_677	0	2	2	1	30	135	FrootLoops.bmp	MilkyWay.bmp	22	21	0	i	3	1	0.624351	9	8	1.966667	1.973333	2	day2	1
BM2_677	0	2	2	1	31	148	FrootLoops.bmp	KitKat_small.bmp	22	21	0	i	3	1	0.819602	9	6	1.966667	1.98	2	day2	1
BM2_677	0	2	2	1	32	151	Snickers.bmp	Skittles.bmp	13	14	1	u	2	1	0.634634	26	24	1.406667	1.493333	2	day2	1
BM2_677	0	2	2	1	33	154	PeanutMMs.bmp	Whatchamacallit.bmp	23	24	1	u	4	1	0.602374	13	14	1.78	1.713333	2	day2	1
BM2_677	0	2	2	1	34	160	FigNewton_small.bmp	RitzBitz2.bmp	24	23	0	i	4	1	0.617138	10	15	1.953333	1.706667	2	day2	1
BM2_677	0	2	2	1	35	164	Nutterbutter.bmp	TeddyGrahamschocolate.bmp	13	14	1	i	2	0	0.877177	27	28	1.393333	1.32	2	day2	1
BM2_677	0	2	2	1	36	168	PopTartsCinnamon.bmp	Milano.bmp	21	22	1	i	3	0	0.873866	5	7	1.986667	1.973333	2	day2	1
BM2_677	0	2	2	2	37	171	Sourpatch.bmp	PopTartsCinnamon.bmp	22	21	0	u	3	0	0.713597	3	5	2.073333	1.986667	2	day2	1
BM2_677	0	2	2	2	38	177	Whatchamacallit.bmp	RitzBitz2.bmp	24	23	0	i	4	1	0.75239	14	15	1.713333	1.706667	2	day2	1
BM2_677	0	2	2	2	39	181	KitKat_small.bmp	Sourpatch.bmp	21	22	1	i	3	0	0.701123	6	3	1.98	2.073333	2	day2	1
BM2_677	0	2	2	2	40	187	FamousAmos_small.bmp	Riprolls.bmp	11	12	1	i	1	0	0.739914	22	21	1.526667	1.626667	2	day2	1
BM2_677	0	2	2	2	41	192	BabyRuth.bmp	Ghiradelli_milk_Almonds.bmp	13	14	1	i	2	0	0.820996	29	30	1.293333	1.28	2	day2	1
BM2_677	0	2	2	2	42	202	Goldfish.bmp	Dots_one.bmp	12	11	0	i	1	1	0.856513	17	19	1.7	1.68	2	day2	1
BM2_677	0	2	2	2	43	212	3Musketeers.bmp	Whatchamacallit.bmp	23	24	1	u	4	1	0.596029	12	14	1.78	1.713333	2	day2	1
BM2_677	0	2	2	2	44	220	FigNewton_small.bmp	RitzBitz2.bmp	24	23	0	i	4	1	0.861498	10	15	1.953333	1.706667	2	day2	1
BM2_677	0	2	2	2	45	224	RitzBitz2.bmp	ChipsAhoy_small.bmp	23	24	1	i	4	0	1.281567	15	16	1.706667	1.7	2	day2	1
BM2_677	0	2	2	2	46	227	FamousAmos_small.bmp	Laffytaffyred_one.bmp	11	12	1	u	1	1	0.825299	22	23	1.526667	1.493333	2	day2	1
BM2_677	0	2	2	2	47	230	Goldfish.bmp	MrGoodbar.bmp	12	11	0	u	1	0	1.200318	17	20	1.7	1.64	2	day2	1
BM2_677	0	2	2	2	48	233	Laffytaffyred_one.bmp	Dots_one.bmp	12	11	0	i	1	1	0.744044	23	19	1.493333	1.68	2	day2	1
BM2_677	0	2	2	2	49	241	Milano.bmp	PopTartsCinnamon.bmp	22	21	0	u	3	0	0.736861	7	5	1.973333	1.986667	2	day2	1
BM2_677	0	2	2	2	50	244	Ghiradelli_milk_Almonds.bmp	Snickers.bmp	14	13	0	i	2	1	0.648596	30	26	1.28	1.406667	2	day2	1
BM2_677	0	2	2	2	51	252	PeanutMMs.bmp	ChipsAhoy_small.bmp	23	24	1	u	4	1	0.633371	13	16	1.78	1.7	2	day2	1
BM2_677	0	2	2	2	52	259	KitKat_small.bmp	Milano.bmp	21	22	1	i	3	0	0.741836	6	7	1.98	1.973333	2	day2	1
BM2_677	0	2	2	2	53	262	Nutterbutter.bmp	TeddyGrahamschocolate.bmp	13	14	1	i	2	0	0.804803	27	28	1.393333	1.32	2	day2	1
BM2_677	0	2	2	2	54	269	Ghiradelli_milk_Almonds.bmp	Nutterbutter.bmp	14	13	0	u	2	0	0.696663	30	27	1.28	1.393333	2	day2	1
BM2_677	0	2	2	2	55	273	PopTartsCinnamon.bmp	FrootLoops.bmp	21	22	1	u	3	1	1.117352	5	9	1.986667	1.966667	2	day2	1
BM2_677	0	2	2	2	56	282	Whatchamacallit.bmp	PeanutMMs.bmp	24	23	0	i	4	1	0.587952	14	13	1.713333	1.78	2	day2	1
BM2_677	0	2	2	2	57	286	Snickers.bmp	TeddyGrahamschocolate.bmp	13	14	1	u	2	1	0.551962	26	28	1.406667	1.32	2	day2	1
BM2_677	0	2	2	2	58	300	TeddyGrahamschocolate.bmp	BabyRuth.bmp	14	13	0	u	2	0	0.840223	28	29	1.32	1.293333	2	day2	1
BM2_677	0	2	2	2	59	303	Riprolls.bmp	Dots_one.bmp	12	11	0	i	1	1	0.967258	21	19	1.626667	1.68	2	day2	1
BM2_677	0	2	2	2	60	306	3Musketeers.bmp	FigNewton_small.bmp	23	24	1	u	4	1	0.558987	12	10	1.78	1.953333	2	day2	1
BM2_677	0	2	2	2	61	309	MilkyWay.bmp	Milano.bmp	21	22	1	u	3	1	0.61402	8	7	1.973333	1.973333	2	day2	1
BM2_677	0	2	2	2	62	312	BabyRuth.bmp	Skittles.bmp	13	14	1	i	2	0	0.725305	29	24	1.293333	1.493333	2	day2	1
BM2_677	0	2	2	2	63	315	ChipsAhoy_small.bmp	3Musketeers.bmp	24	23	0	i	4	1	0.901458	16	12	1.7	1.78	2	day2	1
BM2_677	0	2	2	2	64	318	Snickers.bmp	Skittles.bmp	13	14	1	u	2	1	0.668455	26	24	1.406667	1.493333	2	day2	1
BM2_677	0	2	2	2	65	324	KitKat_small.bmp	FrootLoops.bmp	21	22	1	u	3	1	1.03528	6	9	1.98	1.966667	2	day2	1
BM2_677	0	2	2	2	66	328	Laffytaffyred_one.bmp	MrGoodbar.bmp	12	11	0	i	1	1	0.767951	23	20	1.493333	1.64	2	day2	1
BM2_677	0	2	2	2	67	333	Sourpatch.bmp	MilkyWay.bmp	22	21	0	u	3	0	0.721746	3	8	2.073333	1.973333	2	day2	1
BM2_677	0	2	2	2	68	339	Nutterbutter.bmp	Skittles.bmp	13	14	1	i	2	0	0.720556	27	24	1.393333	1.493333	2	day2	1
BM2_677	0	2	2	2	69	342	FigNewton_small.bmp	PeanutMMs.bmp	24	23	0	i	4	1	0.663593	10	13	1.953333	1.78	2	day2	1
BM2_677	0	2	2	2	70	345	Goldfish.bmp	FamousAmos_small.bmp	12	11	0	u	1	0	1.015319	17	22	1.7	1.526667	2	day2	1
BM2_677	0	2	2	2	71	349	MilkyWay.bmp	FrootLoops.bmp	21	22	1	u	3	1	0.731996	8	9	1.973333	1.966667	2	day2	1
BM2_677	0	2	2	2	72	352	Riprolls.bmp	MrGoodbar.bmp	12	11	0	i	1	1	0.795079	21	20	1.626667	1.64	2	day2	1
BM2_678	0	1	1	1	1	0	Riprolls.bmp	Milkduds.bmp	21	22	1	i	3	0	0.728039	21	20	1.886667	1.9	2	day2	1
BM2_678	0	1	1	1	2	10	PayDay.bmp	HoHo.bmp	11	12	1	u	1	1	0.708277	7	6	2.32	2.393333	2	day2	1
BM2_678	0	1	1	1	3	13	SourSkittles.bmp	Twix.bmp	22	21	0	i	3	1	0.70727	19	17	1.946667	1.973333	2	day2	1
BM2_678	0	1	1	1	4	16	Cupcakes.bmp	Snickers.bmp	14	13	0	i	2	1	0.803054	15	16	1.993333	1.98	2	day2	1
BM2_678	0	1	1	1	5	20	100grand_small.bmp	Skittles.bmp	13	14	1	u	2	1	0.735799	10	12	2.126667	2.066667	2	day2	1
BM2_678	0	1	1	1	6	24	Nutterbutter.bmp	Twix.bmp	22	21	0	i	3	1	0.771824	22	17	1.806667	1.973333	2	day2	1
BM2_678	0	1	1	1	7	28	Fritos.bmp	Hersheymilk_several.bmp	24	23	0	u	4	0	0.864507	26	30	1.68	1.28	2	day2	1
BM2_678	0	1	1	1	8	32	Nutterbutter.bmp	Ghiradelli_milk.bmp	22	21	0	i	3	1	0.781323	22	23	1.806667	1.766667	2	day2	1
BM2_678	0	1	1	1	9	38	BabyRuth.bmp	Toberlorone.bmp	14	13	0	i	2	1	1.027053	13	14	2.06	2.06	2	day2	1
BM2_678	0	1	1	1	10	42	RitzBitz2.bmp	Whatchamacallit.bmp	24	23	0	i	4	1	0.824774	29	28	1.293333	1.513333	2	day2	1
BM2_678	0	1	1	1	11	45	Fritos.bmp	Whatchamacallit.bmp	24	23	0	u	4	0	1.007908	26	28	1.68	1.513333	2	day2	1
BM2_678	0	1	1	1	12	48	PayDay.bmp	PopTartsStrawberry.bmp	11	12	1	u	1	1	0.759611	7	8	2.32	2.24	2	day2	1
BM2_678	0	1	1	1	13	52	Reeses.bmp	MrGoodbar.bmp	24	23	0	i	4	1	0.867667	27	24	1.646667	1.72	2	day2	1
BM2_678	0	1	1	1	14	61	Fritos.bmp	MrGoodbar.bmp	24	23	0	u	4	0	0.690184	26	24	1.68	1.72	2	day2	1
BM2_678	0	1	1	1	15	68	BabyRuth.bmp	100grand_small.bmp	14	13	0	i	2	1	0.733922	13	10	2.06	2.126667	2	day2	1
BM2_678	0	1	1	1	16	73	MrGoodbar.bmp	RitzBitz2.bmp	23	24	1	u	4	1	0.7197	24	29	1.72	1.293333	2	day2	1
BM2_678	0	1	1	1	17	77	Skittles.bmp	Toberlorone.bmp	14	13	0	i	2	1	0.635734	12	14	2.066667	2.06	2	day2	1
BM2_678	0	1	1	1	18	80	HoHo.bmp	Cheezits.bmp	12	11	0	i	1	1	0.875461	6	9	2.393333	2.206667	2	day2	1
BM2_678	0	1	1	1	19	84	Snickers.bmp	Skittles.bmp	13	14	1	u	2	1	0.944199	16	12	1.98	2.066667	2	day2	1
BM2_678	0	1	1	1	20	93	Ghiradelli_milk.bmp	SourSkittles.bmp	21	22	1	i	3	0	0.838763	23	19	1.766667	1.946667	2	day2	1
BM2_678	0	1	1	1	21	98	RitzBitz2.bmp	Hersheymilk_several.bmp	24	23	0	i	4	1	1.272506	29	30	1.293333	1.28	2	day2	1
BM2_678	0	1	1	1	22	101	Hersheymilk_several.bmp	Reeses.bmp	23	24	1	i	4	0	1.271472	30	27	1.28	1.646667	2	day2	1
BM2_678	0	1	1	1	23	104	PayDay.bmp	Butterfinger.bmp	11	12	1	i	1	0	1.135303	7	5	2.32	2.393333	2	day2	1
BM2_678	0	1	1	1	24	108	Whatchamacallit.bmp	Reeses.bmp	23	24	1	u	4	1	1.083335	28	27	1.513333	1.646667	2	day2	1
BM2_678	0	1	1	1	25	111	Twix.bmp	Milkduds.bmp	21	22	1	u	3	1	0.995076	17	20	1.973333	1.9	2	day2	1
BM2_678	0	1	1	1	26	114	Riprolls.bmp	Nutterbutter.bmp	21	22	1	u	3	1	1.10682	21	22	1.886667	1.806667	2	day2	1
BM2_678	0	1	1	1	27	123	SourSkittles.bmp	Riprolls.bmp	22	21	0	u	3	0	1.03261	19	21	1.946667	1.886667	2	day2	1
BM2_678	0	1	1	1	28	126	Almondjoy.bmp	PopTartsStrawberry.bmp	11	12	1	u	1	1	0.92832	3	8	2.513333	2.24	2	day2	1
BM2_678	0	1	1	1	29	130	Almondjoy.bmp	Butterfinger.bmp	11	12	1	u	1	1	1.012352	3	5	2.513333	2.393333	2	day2	1
BM2_678	0	1	1	1	30	135	BabyRuth.bmp	Snickers.bmp	14	13	0	u	2	0	1.006097	13	16	2.06	1.98	2	day2	1
BM2_678	0	1	1	1	31	148	Almondjoy.bmp	HoHo.bmp	11	12	1	u	1	1	0.945373	3	6	2.513333	2.393333	2	day2	1
BM2_678	0	1	1	1	32	151	Cupcakes.bmp	100grand_small.bmp	14	13	0	i	2	1	0.744402	15	10	1.993333	2.126667	2	day2	1
BM2_678	0	1	1	1	33	154	Cheezits.bmp	Butterfinger.bmp	11	12	1	i	1	0	1.000187	9	5	2.206667	2.393333	2	day2	1
BM2_678	0	1	1	1	34	160	PopTartsStrawberry.bmp	Cheezits.bmp	12	11	0	i	1	1	0.926861	8	9	2.24	2.206667	2	day2	1
BM2_678	0	1	1	1	35	164	Ghiradelli_milk.bmp	Milkduds.bmp	21	22	1	u	3	1	0.955602	23	20	1.766667	1.9	2	day2	1
BM2_678	0	1	1	1	36	168	Toberlorone.bmp	Cupcakes.bmp	13	14	1	u	2	1	0.871741	14	15	2.06	1.993333	2	day2	1
BM2_678	0	1	1	2	37	171	BabyRuth.bmp	100grand_small.bmp	14	13	0	i	2	1	1.239482	13	10	2.06	2.126667	2	day2	1
BM2_678	0	1	1	2	38	177	Snickers.bmp	Skittles.bmp	13	14	1	u	2	1	0.918272	16	12	1.98	2.066667	2	day2	1
BM2_678	0	1	1	2	39	181	SourSkittles.bmp	Twix.bmp	22	21	0	i	3	1	1.354961	19	17	1.946667	1.973333	2	day2	1
BM2_678	0	1	1	2	40	187	PopTartsStrawberry.bmp	Cheezits.bmp	12	11	0	i	1	1	0.95375	8	9	2.24	2.206667	2	day2	1
BM2_678	0	1	1	2	41	192	Toberlorone.bmp	Cupcakes.bmp	13	14	1	u	2	1	0.650771	14	15	2.06	1.993333	2	day2	1
BM2_678	0	1	1	2	42	202	100grand_small.bmp	Skittles.bmp	13	14	1	u	2	1	0.766304	10	12	2.126667	2.066667	2	day2	1
BM2_678	0	1	1	2	43	212	Whatchamacallit.bmp	Reeses.bmp	23	24	1	u	4	1	0.921779	28	27	1.513333	1.646667	2	day2	1
BM2_678	0	1	1	2	44	220	RitzBitz2.bmp	Hersheymilk_several.bmp	24	23	0	u	4	0	1.227319	29	30	1.293333	1.28	2	day2	1
BM2_678	0	1	1	2	45	224	Toberlorone.bmp	BabyRuth.bmp	13	14	1	u	2	1	0.991403	14	13	2.06	2.06	2	day2	1
BM2_678	0	1	1	2	46	227	BabyRuth.bmp	Snickers.bmp	14	13	0	u	2	0	1.263132	13	16	2.06	1.98	2	day2	1
BM2_678	0	1	1	2	47	230	Twix.bmp	Nutterbutter.bmp	21	22	1	u	3	1	1.03017	17	22	1.973333	1.806667	2	day2	1
BM2_678	0	1	1	2	48	233	Milkduds.bmp	Riprolls.bmp	22	21	0	x	3	NA	NA	20	21	1.9	1.886667	2	day2	1
BM2_678	0	1	1	2	49	241	Cupcakes.bmp	Snickers.bmp	14	13	0	i	2	1	0.742636	15	16	1.993333	1.98	2	day2	1
BM2_678	0	1	1	2	50	244	SourSkittles.bmp	Riprolls.bmp	22	21	0	u	3	0	0.822393	19	21	1.946667	1.886667	2	day2	1
BM2_678	0	1	1	2	51	252	Twix.bmp	Milkduds.bmp	21	22	1	u	3	1	0.767201	17	20	1.973333	1.9	2	day2	1
BM2_678	0	1	1	2	52	259	Whatchamacallit.bmp	RitzBitz2.bmp	23	24	1	u	4	1	0.754998	28	29	1.513333	1.293333	2	day2	1
BM2_678	0	1	1	2	53	262	100grand_small.bmp	Cupcakes.bmp	13	14	1	u	2	1	0.738741	10	15	2.126667	1.993333	2	day2	1
BM2_678	0	1	1	2	54	269	HoHo.bmp	Almondjoy.bmp	12	11	0	i	1	1	0.774521	6	3	2.393333	2.513333	2	day2	1
BM2_678	0	1	1	2	55	273	PayDay.bmp	Butterfinger.bmp	11	12	1	u	1	1	0.81927	7	5	2.32	2.393333	2	day2	1
BM2_678	0	1	1	2	56	282	Ghiradelli_milk.bmp	Nutterbutter.bmp	21	22	1	u	3	1	0.929776	23	22	1.766667	1.806667	2	day2	1
BM2_678	0	1	1	2	57	286	MrGoodbar.bmp	Fritos.bmp	23	24	1	u	4	1	0.829817	24	26	1.72	1.68	2	day2	1
BM2_678	0	1	1	2	58	300	Cheezits.bmp	Butterfinger.bmp	11	12	1	i	1	0	0.83808	9	5	2.206667	2.393333	2	day2	1
BM2_678	0	1	1	2	59	303	Ghiradelli_milk.bmp	SourSkittles.bmp	21	22	1	u	3	1	0.996916	23	19	1.766667	1.946667	2	day2	1
BM2_678	0	1	1	2	60	306	Nutterbutter.bmp	Riprolls.bmp	22	21	0	u	3	0	0.931701	22	21	1.806667	1.886667	2	day2	1
BM2_678	0	1	1	2	61	309	PopTartsStrawberry.bmp	Almondjoy.bmp	12	11	0	i	1	1	0.811898	8	3	2.24	2.513333	2	day2	1
BM2_678	0	1	1	2	62	312	Reeses.bmp	MrGoodbar.bmp	24	23	0	i	4	1	1.115232	27	24	1.646667	1.72	2	day2	1
BM2_678	0	1	1	2	63	315	Milkduds.bmp	Ghiradelli_milk.bmp	22	21	0	i	3	1	0.811313	20	23	1.9	1.766667	2	day2	1
BM2_678	0	1	1	2	64	318	Fritos.bmp	Whatchamacallit.bmp	24	23	0	i	4	1	1.130397	26	28	1.68	1.513333	2	day2	1
BM2_678	0	1	1	2	65	324	Skittles.bmp	Toberlorone.bmp	14	13	0	i	2	1	0.833161	12	14	2.066667	2.06	2	day2	1
BM2_678	0	1	1	2	66	328	RitzBitz2.bmp	MrGoodbar.bmp	24	23	0	i	4	1	0.653911	29	24	1.293333	1.72	2	day2	1
BM2_678	0	1	1	2	67	333	Cheezits.bmp	HoHo.bmp	11	12	1	u	1	1	0.759622	9	6	2.206667	2.393333	2	day2	1
BM2_678	0	1	1	2	68	339	Reeses.bmp	Hersheymilk_several.bmp	24	23	0	u	4	0	1.046441	27	30	1.646667	1.28	2	day2	1
BM2_678	0	1	1	2	69	342	Butterfinger.bmp	Almondjoy.bmp	12	11	0	i	1	1	0.77341	5	3	2.393333	2.513333	2	day2	1
BM2_678	0	1	1	2	70	345	PayDay.bmp	HoHo.bmp	11	12	1	u	1	1	0.701201	7	6	2.32	2.393333	2	day2	1
BM2_678	0	1	1	2	71	349	PayDay.bmp	PopTartsStrawberry.bmp	11	12	1	u	1	1	0.729934	7	8	2.32	2.24	2	day2	1
BM2_678	0	1	1	2	72	352	Hersheymilk_several.bmp	Fritos.bmp	23	24	1	i	4	0	0.82492	30	26	1.28	1.68	2	day2	1
BM2_679	0	2	1	1	1	0	Almondjoy.bmp	Chocolate_mm.bmp	22	21	0	i	3	1	0.573049	8	3	1.306667	1.526667	2	day2	1
BM2_679	0	2	1	1	2	10	Oreos.bmp	Chocolate_mm.bmp	22	21	0	i	3	1	0.544921	6	3	1.346667	1.526667	2	day2	1
BM2_679	0	2	1	1	3	13	Slimjim.bmp	Almondjoy.bmp	21	22	1	i	3	0	0.704302	7	8	1.32	1.306667	2	day2	1
BM2_679	0	2	1	1	4	16	PopTartsCinnamon.bmp	Milano.bmp	24	23	0	i	4	1	0.559971	13	10	1.053333	1.233333	2	day2	1
BM2_679	0	2	1	1	5	20	Riprolls.bmp	FlamingCheetos.bmp	14	13	0	u	2	0	1.012797	27	28	0.8	0.793333	2	day2	1
BM2_679	0	2	1	1	6	24	Cheezits.bmp	Cheetos.bmp	13	14	1	i	2	0	0.856837	30	29	0.78	0.78	2	day2	1
BM2_679	0	2	1	1	7	28	MilkyWay.bmp	Granolabar.bmp	11	12	1	u	1	1	0.845462	23	19	0.813333	0.88	2	day2	1
BM2_679	0	2	1	1	8	32	PopTartsCinnamon.bmp	PopTartsStrawberry.bmp	24	23	0	i	4	1	0.746332	13	14	1.053333	1.053333	2	day2	1
BM2_679	0	2	1	1	9	38	Laysclassic.bmp	Cheezits.bmp	14	13	0	i	2	1	0.768531	26	30	0.8	0.78	2	day2	1
BM2_679	0	2	1	1	10	42	Sourpatch.bmp	PopTartsCinnamon.bmp	23	24	1	u	4	1	0.83783	16	13	1.046667	1.053333	2	day2	1
BM2_679	0	2	1	1	11	45	Milano.bmp	Skittles.bmp	23	24	1	i	4	0	1.028794	10	15	1.233333	1.053333	2	day2	1
BM2_679	0	2	1	1	12	48	FlamingCheetos.bmp	Cheetos.bmp	13	14	1	i	2	0	0.628585	28	29	0.793333	0.78	2	day2	1
BM2_679	0	2	1	1	13	52	Twinkie.bmp	MilkyWay.bmp	12	11	0	i	1	1	0.976585	22	23	0.826667	0.813333	2	day2	1
BM2_679	0	2	1	1	14	61	Cheetos.bmp	Butterfinger.bmp	14	13	0	u	2	0	0.887152	29	24	0.78	0.806667	2	day2	1
BM2_679	0	2	1	1	15	68	Butterfinger.bmp	Laysclassic.bmp	13	14	1	u	2	1	1.050985	24	26	0.806667	0.8	2	day2	1
BM2_679	0	2	1	1	16	73	CheesyDoritos.bmp	100grand_small.bmp	12	11	0	u	1	0	0.99667	20	21	0.866667	0.84	2	day2	1
BM2_679	0	2	1	1	17	77	Twinkie.bmp	MrGoodbar.bmp	12	11	0	i	1	1	0.656513	22	17	0.826667	1.04	2	day2	1
BM2_679	0	2	1	1	18	80	Chocolate_mm.bmp	Ghiradelli_milk.bmp	21	22	1	i	3	0	0.680392	3	5	1.526667	1.466667	2	day2	1
BM2_679	0	2	1	1	19	84	Cheezits.bmp	Riprolls.bmp	13	14	1	i	2	0	1.02119	30	27	0.78	0.8	2	day2	1
BM2_679	0	2	1	1	20	93	CheesyDoritos.bmp	MilkyWay.bmp	12	11	0	i	1	1	0.739844	20	23	0.866667	0.813333	2	day2	1
BM2_679	0	2	1	1	21	98	100grand_small.bmp	Twinkie.bmp	11	12	1	u	1	1	1.133472	21	22	0.84	0.826667	2	day2	1
BM2_679	0	2	1	1	22	101	Sourpatch.bmp	Skittles.bmp	23	24	1	u	4	1	0.756432	16	15	1.046667	1.053333	2	day2	1
BM2_679	0	2	1	1	23	104	Skittles.bmp	PopTartsStrawberry.bmp	24	23	0	u	4	0	0.852227	15	14	1.053333	1.053333	2	day2	1
BM2_679	0	2	1	1	24	108	Ghiradelli_milk.bmp	PringlesRed.bmp	22	21	0	u	3	0	0.792962	5	9	1.466667	1.26	2	day2	1
BM2_679	0	2	1	1	25	111	PopTartsStrawberry.bmp	PeanutMMs.bmp	23	24	1	u	4	1	0.81596	14	12	1.053333	1.086667	2	day2	1
BM2_679	0	2	1	1	26	114	CheesyDoritos.bmp	MrGoodbar.bmp	12	11	0	i	1	1	0.711752	20	17	0.866667	1.04	2	day2	1
BM2_679	0	2	1	1	27	123	MrGoodbar.bmp	Granolabar.bmp	11	12	1	u	1	1	0.821606	17	19	1.04	0.88	2	day2	1
BM2_679	0	2	1	1	28	126	Almondjoy.bmp	PringlesRed.bmp	22	21	0	u	3	0	1.069254	8	9	1.306667	1.26	2	day2	1
BM2_679	0	2	1	1	29	130	FlamingCheetos.bmp	Laysclassic.bmp	13	14	1	u	2	1	1.465256	28	26	0.793333	0.8	2	day2	1
BM2_679	0	2	1	1	30	135	PeanutMMs.bmp	Milano.bmp	24	23	0	i	4	1	1.043087	12	10	1.086667	1.233333	2	day2	1
BM2_679	0	2	1	1	31	148	Oreos.bmp	PringlesRed.bmp	22	21	0	i	3	1	1.158341	6	9	1.346667	1.26	2	day2	1
BM2_679	0	2	1	1	32	151	Slimjim.bmp	Oreos.bmp	21	22	1	u	3	1	0.709374	7	6	1.32	1.346667	2	day2	1
BM2_679	0	2	1	1	33	154	Slimjim.bmp	Ghiradelli_milk.bmp	21	22	1	u	3	1	0.453102	7	5	1.32	1.466667	2	day2	1
BM2_679	0	2	1	1	34	160	Riprolls.bmp	Butterfinger.bmp	14	13	0	u	2	0	1.155876	27	24	0.8	0.806667	2	day2	1
BM2_679	0	2	1	1	35	164	Sourpatch.bmp	PeanutMMs.bmp	23	24	1	u	4	1	0.616601	16	12	1.046667	1.086667	2	day2	1
BM2_679	0	2	1	1	36	168	100grand_small.bmp	Granolabar.bmp	11	12	1	u	1	1	0.668651	21	19	0.84	0.88	2	day2	1
BM2_679	0	2	1	2	37	171	CheesyDoritos.bmp	MrGoodbar.bmp	12	11	0	i	1	1	0.668401	20	17	0.866667	1.04	2	day2	1
BM2_679	0	2	1	2	38	177	Ghiradelli_milk.bmp	PringlesRed.bmp	22	21	0	u	3	0	0.803162	5	9	1.466667	1.26	2	day2	1
BM2_679	0	2	1	2	39	181	MrGoodbar.bmp	Granolabar.bmp	11	12	1	u	1	1	0.543915	17	19	1.04	0.88	2	day2	1
BM2_679	0	2	1	2	40	187	Skittles.bmp	Milano.bmp	24	23	0	u	4	0	0.710678	15	10	1.053333	1.233333	2	day2	1
BM2_679	0	2	1	2	41	192	MilkyWay.bmp	Granolabar.bmp	11	12	1	u	1	1	0.664445	23	19	0.813333	0.88	2	day2	1
BM2_679	0	2	1	2	42	202	Butterfinger.bmp	Riprolls.bmp	13	14	1	i	2	0	0.643166	24	27	0.806667	0.8	2	day2	1
BM2_679	0	2	1	2	43	212	Ghiradelli_milk.bmp	Slimjim.bmp	22	21	0	x	3	NA	NA	5	7	1.466667	1.32	2	day2	1
BM2_679	0	2	1	2	44	220	Riprolls.bmp	FlamingCheetos.bmp	14	13	0	i	2	1	0.672246	27	28	0.8	0.793333	2	day2	1
BM2_679	0	2	1	2	45	224	Butterfinger.bmp	Laysclassic.bmp	13	14	1	i	2	0	0.612294	24	26	0.806667	0.8	2	day2	1
BM2_679	0	2	1	2	46	227	PeanutMMs.bmp	PopTartsStrawberry.bmp	24	23	0	i	4	1	0.604024	12	14	1.086667	1.053333	2	day2	1
BM2_679	0	2	1	2	47	230	Granolabar.bmp	100grand_small.bmp	12	11	0	i	1	1	0.586992	19	21	0.88	0.84	2	day2	1
BM2_679	0	2	1	2	48	233	FlamingCheetos.bmp	Cheetos.bmp	13	14	1	i	2	0	0.570786	28	29	0.793333	0.78	2	day2	1
BM2_679	0	2	1	2	49	241	Milano.bmp	PeanutMMs.bmp	23	24	1	i	4	0	0.923589	10	12	1.233333	1.086667	2	day2	1
BM2_679	0	2	1	2	50	244	CheesyDoritos.bmp	MilkyWay.bmp	12	11	0	i	1	1	0.72332	20	23	0.866667	0.813333	2	day2	1
BM2_679	0	2	1	2	51	252	Laysclassic.bmp	FlamingCheetos.bmp	14	13	0	i	2	1	0.604085	26	28	0.8	0.793333	2	day2	1
BM2_679	0	2	1	2	52	259	CheesyDoritos.bmp	100grand_small.bmp	12	11	0	i	1	1	1.056596	20	21	0.866667	0.84	2	day2	1
BM2_679	0	2	1	2	53	262	Cheetos.bmp	Butterfinger.bmp	14	13	0	u	2	0	0.743626	29	24	0.78	0.806667	2	day2	1
BM2_679	0	2	1	2	54	269	MrGoodbar.bmp	Twinkie.bmp	11	12	1	u	1	1	0.859403	17	22	1.04	0.826667	2	day2	1
BM2_679	0	2	1	2	55	273	Oreos.bmp	PringlesRed.bmp	22	21	0	i	3	1	0.640058	6	9	1.346667	1.26	2	day2	1
BM2_679	0	2	1	2	56	282	Twinkie.bmp	100grand_small.bmp	12	11	0	i	1	1	0.67062	22	21	0.826667	0.84	2	day2	1
BM2_679	0	2	1	2	57	286	Cheezits.bmp	Cheetos.bmp	13	14	1	i	2	0	0.602684	30	29	0.78	0.78	2	day2	1
BM2_679	0	2	1	2	58	300	Cheezits.bmp	Riprolls.bmp	13	14	1	i	2	0	0.970903	30	27	0.78	0.8	2	day2	1
BM2_679	0	2	1	2	59	303	Sourpatch.bmp	PopTartsCinnamon.bmp	23	24	1	u	4	1	1.009992	16	13	1.046667	1.053333	2	day2	1
BM2_679	0	2	1	2	60	306	Chocolate_mm.bmp	Oreos.bmp	21	22	1	u	3	1	0.864871	3	6	1.526667	1.346667	2	day2	1
BM2_679	0	2	1	2	61	309	Almondjoy.bmp	PringlesRed.bmp	22	21	0	u	3	0	0.808748	8	9	1.306667	1.26	2	day2	1
BM2_679	0	2	1	2	62	312	Almondjoy.bmp	Slimjim.bmp	22	21	0	i	3	1	0.856217	8	7	1.306667	1.32	2	day2	1
BM2_679	0	2	1	2	63	315	Sourpatch.bmp	PeanutMMs.bmp	23	24	1	u	4	1	0.632224	16	12	1.046667	1.086667	2	day2	1
BM2_679	0	2	1	2	64	318	MilkyWay.bmp	Twinkie.bmp	11	12	1	u	1	1	0.751259	23	22	0.813333	0.826667	2	day2	1
BM2_679	0	2	1	2	65	324	Milano.bmp	PopTartsCinnamon.bmp	23	24	1	u	4	1	0.89402	10	13	1.233333	1.053333	2	day2	1
BM2_679	0	2	1	2	66	328	Cheezits.bmp	Laysclassic.bmp	13	14	1	u	2	1	0.83472	30	26	0.78	0.8	2	day2	1
BM2_679	0	2	1	2	67	333	Skittles.bmp	Sourpatch.bmp	24	23	0	i	4	1	0.644501	15	16	1.053333	1.046667	2	day2	1
BM2_679	0	2	1	2	68	339	Skittles.bmp	PopTartsStrawberry.bmp	24	23	0	u	4	0	1.003255	15	14	1.053333	1.053333	2	day2	1
BM2_679	0	2	1	2	69	342	Slimjim.bmp	Oreos.bmp	21	22	1	u	3	1	0.730281	7	6	1.32	1.346667	2	day2	1
BM2_679	0	2	1	2	70	345	Chocolate_mm.bmp	Ghiradelli_milk.bmp	21	22	1	i	3	0	0.610009	3	5	1.526667	1.466667	2	day2	1
BM2_679	0	2	1	2	71	349	PopTartsCinnamon.bmp	PopTartsStrawberry.bmp	24	23	0	i	4	1	0.654717	13	14	1.053333	1.053333	2	day2	1
BM2_679	0	2	1	2	72	352	Chocolate_mm.bmp	Almondjoy.bmp	21	22	1	i	3	0	0.709836	3	8	1.526667	1.306667	2	day2	1
BM2_680	0	1	2	1	1	0	Cupcakes.bmp	Goldfish.bmp	24	23	0	x	4	NA	NA	24	29	1.733333	1.533333	2	day2	1
BM2_680	0	1	2	1	2	9	Sourpatch.bmp	Granolabar.bmp	13	14	1	u	2	1	0.732999	12	10	2.426667	2.466667	2	day2	1
BM2_680	0	1	2	1	3	12	SourSkittles.bmp	Toberlorone.bmp	21	22	1	i	3	0	0.988122	20	17	2.093333	2.213333	2	day2	1
BM2_680	0	1	2	1	4	17	Chocolate_mm.bmp	Ghiradelli_milk.bmp	14	13	0	i	2	1	0.917879	14	15	2.273333	2.273333	2	day2	1
BM2_680	0	1	2	1	5	26	Ghiradelli_milk.bmp	Granolabar.bmp	13	14	1	u	2	1	1.020379	15	10	2.273333	2.466667	2	day2	1
BM2_680	0	1	2	1	6	32	Skittles.bmp	FrootLoops.bmp	22	21	0	i	3	1	0.875155	21	22	2.08	1.986667	2	day2	1
BM2_680	0	1	2	1	7	35	Oreos.bmp	Sourpatch.bmp	14	13	0	u	2	0	0.802139	16	12	2.233333	2.426667	2	day2	1
BM2_680	0	1	2	1	8	48	PeanutMMs.bmp	FamousAmos_small.bmp	12	11	0	i	1	1	0.725437	7	8	2.553333	2.506667	2	day2	1
BM2_680	0	1	2	1	9	58	Oreos.bmp	Snickers.bmp	14	13	0	u	2	0	0.880969	16	13	2.233333	2.32	2	day2	1
BM2_680	0	1	2	1	10	63	Butterfinger.bmp	SourSkittles.bmp	22	21	0	i	3	1	1.297962	23	20	1.94	2.093333	2	day2	1
BM2_680	0	1	2	1	11	66	Almondjoy.bmp	Cupcakes.bmp	23	24	1	u	4	1	0.704682	26	24	1.573333	1.733333	2	day2	1
BM2_680	0	1	2	1	12	69	Snickers.bmp	Granolabar.bmp	13	14	1	i	2	0	0.936775	13	10	2.32	2.466667	2	day2	1
BM2_680	0	1	2	1	13	72	Keeblerfudgestripes.bmp	RitzBitz2.bmp	11	12	1	u	1	1	0.968519	5	9	2.886667	2.486667	2	day2	1
BM2_680	0	1	2	1	14	82	Keeblerfudgestripes.bmp	PeanutMMs.bmp	11	12	1	u	1	1	1.076028	5	7	2.886667	2.553333	2	day2	1
BM2_680	0	1	2	1	15	85	PayDay.bmp	Goldfish.bmp	24	23	0	i	4	1	0.739078	28	29	1.546667	1.533333	2	day2	1
BM2_680	0	1	2	1	16	95	FamousAmos_small.bmp	RitzBitz2.bmp	11	12	1	i	1	0	1.230504	8	9	2.506667	2.486667	2	day2	1
BM2_680	0	1	2	1	17	98	100grand_small.bmp	Twinkie.bmp	24	23	0	i	4	1	1.014234	30	27	1.52	1.553333	2	day2	1
BM2_680	0	1	2	1	18	101	Toberlorone.bmp	FrootLoops.bmp	22	21	0	u	3	0	0.94129	17	22	2.213333	1.986667	2	day2	1
BM2_680	0	1	2	1	19	105	Goldfish.bmp	100grand_small.bmp	23	24	1	u	4	1	1.144969	29	30	1.533333	1.52	2	day2	1
BM2_680	0	1	2	1	20	109	Keeblerfudgestripes.bmp	PopTartsStrawberry.bmp	11	12	1	u	1	1	0.910839	5	3	2.886667	2.966667	2	day2	1
BM2_680	0	1	2	1	21	113	SnoBall.bmp	RitzBitz2.bmp	11	12	1	i	1	0	0.834873	6	9	2.733333	2.486667	2	day2	1
BM2_680	0	1	2	1	22	119	Butterfinger.bmp	ChipsAhoy_small.bmp	22	21	0	i	3	1	0.825587	23	19	1.94	2.12	2	day2	1
BM2_680	0	1	2	1	23	123	PayDay.bmp	Almondjoy.bmp	24	23	0	i	4	1	0.678406	28	26	1.546667	1.573333	2	day2	1
BM2_680	0	1	2	1	24	132	Almondjoy.bmp	100grand_small.bmp	23	24	1	u	4	1	0.668836	26	30	1.573333	1.52	2	day2	1
BM2_680	0	1	2	1	25	140	Oreos.bmp	Ghiradelli_milk.bmp	14	13	0	u	2	0	0.909688	16	15	2.233333	2.273333	2	day2	1
BM2_680	0	1	2	1	26	144	PopTartsStrawberry.bmp	FamousAmos_small.bmp	12	11	0	i	1	1	0.738455	3	8	2.966667	2.506667	2	day2	1
BM2_680	0	1	2	1	27	147	ChipsAhoy_small.bmp	Toberlorone.bmp	21	22	1	u	3	1	0.689396	19	17	2.12	2.213333	2	day2	1
BM2_680	0	1	2	1	28	151	ChipsAhoy_small.bmp	Skittles.bmp	21	22	1	u	3	1	0.9022	19	21	2.12	2.08	2	day2	1
BM2_680	0	1	2	1	29	154	PayDay.bmp	Twinkie.bmp	24	23	0	i	4	1	0.733968	28	27	1.546667	1.553333	2	day2	1
BM2_680	0	1	2	1	30	158	Sourpatch.bmp	Chocolate_mm.bmp	13	14	1	u	2	1	1.057945	12	14	2.426667	2.273333	2	day2	1
BM2_680	0	1	2	1	31	161	SnoBall.bmp	PopTartsStrawberry.bmp	11	12	1	i	1	0	0.712487	6	3	2.733333	2.966667	2	day2	1
BM2_680	0	1	2	1	32	167	Butterfinger.bmp	FrootLoops.bmp	22	21	0	i	3	1	0.832519	23	22	1.94	1.986667	2	day2	1
BM2_680	0	1	2	1	33	170	SourSkittles.bmp	Skittles.bmp	21	22	1	u	3	1	1.064262	20	21	2.093333	2.08	2	day2	1
BM2_680	0	1	2	1	34	174	SnoBall.bmp	PeanutMMs.bmp	11	12	1	i	1	0	0.9643	6	7	2.733333	2.553333	2	day2	1
BM2_680	0	1	2	1	35	179	Chocolate_mm.bmp	Snickers.bmp	14	13	0	i	2	1	0.766055	14	13	2.273333	2.32	2	day2	1
BM2_680	0	1	2	1	36	182	Cupcakes.bmp	Twinkie.bmp	24	23	0	i	4	1	0.701744	24	27	1.733333	1.553333	2	day2	1
BM2_680	0	1	2	2	37	185	Toberlorone.bmp	FrootLoops.bmp	22	21	0	i	3	1	0.932791	17	22	2.213333	1.986667	2	day2	1
BM2_680	0	1	2	2	38	188	SourSkittles.bmp	Butterfinger.bmp	21	22	1	u	3	1	1.004519	20	23	2.093333	1.94	2	day2	1
BM2_680	0	1	2	2	39	191	SourSkittles.bmp	Toberlorone.bmp	21	22	1	u	3	1	0.619596	20	17	2.093333	2.213333	2	day2	1
BM2_680	0	1	2	2	40	195	ChipsAhoy_small.bmp	Butterfinger.bmp	21	22	1	u	3	1	0.944311	19	23	2.12	1.94	2	day2	1
BM2_680	0	1	2	2	41	200	Ghiradelli_milk.bmp	Oreos.bmp	13	14	1	i	2	0	0.63325	15	16	2.273333	2.233333	2	day2	1
BM2_680	0	1	2	2	42	204	Goldfish.bmp	PayDay.bmp	23	24	1	u	4	1	1.190842	29	28	1.533333	1.546667	2	day2	1
BM2_680	0	1	2	2	43	208	RitzBitz2.bmp	FamousAmos_small.bmp	12	11	0	i	1	1	0.898886	9	8	2.486667	2.506667	2	day2	1
BM2_680	0	1	2	2	44	212	Twinkie.bmp	Cupcakes.bmp	23	24	1	u	4	1	0.775644	27	24	1.553333	1.733333	2	day2	1
BM2_680	0	1	2	2	45	218	PopTartsStrawberry.bmp	FamousAmos_small.bmp	12	11	0	i	1	1	0.71041	3	8	2.966667	2.506667	2	day2	1
BM2_680	0	1	2	2	46	224	Granolabar.bmp	Snickers.bmp	14	13	0	i	2	1	0.853175	10	13	2.466667	2.32	2	day2	1
BM2_680	0	1	2	2	47	229	Butterfinger.bmp	FrootLoops.bmp	22	21	0	i	3	1	0.702932	23	22	1.94	1.986667	2	day2	1
BM2_680	0	1	2	2	48	236	Cupcakes.bmp	Goldfish.bmp	24	23	0	i	4	1	1.138654	24	29	1.733333	1.533333	2	day2	1
BM2_680	0	1	2	2	49	240	SnoBall.bmp	PopTartsStrawberry.bmp	11	12	1	i	1	0	0.911466	6	3	2.733333	2.966667	2	day2	1
BM2_680	0	1	2	2	50	250	Ghiradelli_milk.bmp	Chocolate_mm.bmp	13	14	1	i	2	0	0.690976	15	14	2.273333	2.273333	2	day2	1
BM2_680	0	1	2	2	51	260	PayDay.bmp	Twinkie.bmp	24	23	0	i	4	1	0.726469	28	27	1.546667	1.553333	2	day2	1
BM2_680	0	1	2	2	52	264	ChipsAhoy_small.bmp	Toberlorone.bmp	21	22	1	u	3	1	1.090465	19	17	2.12	2.213333	2	day2	1
BM2_680	0	1	2	2	53	271	100grand_small.bmp	Goldfish.bmp	24	23	0	i	4	1	0.775022	30	29	1.52	1.533333	2	day2	1
BM2_680	0	1	2	2	54	275	Almondjoy.bmp	Cupcakes.bmp	23	24	1	u	4	1	0.723059	26	24	1.573333	1.733333	2	day2	1
BM2_680	0	1	2	2	55	279	Twinkie.bmp	100grand_small.bmp	23	24	1	u	4	1	0.871831	27	30	1.553333	1.52	2	day2	1
BM2_680	0	1	2	2	56	283	Chocolate_mm.bmp	Snickers.bmp	14	13	0	i	2	1	0.740557	14	13	2.273333	2.32	2	day2	1
BM2_680	0	1	2	2	57	286	Skittles.bmp	ChipsAhoy_small.bmp	22	21	0	i	3	1	0.899575	21	19	2.08	2.12	2	day2	1
BM2_680	0	1	2	2	58	289	SourSkittles.bmp	Skittles.bmp	21	22	1	u	3	1	1.283257	20	21	2.093333	2.08	2	day2	1
BM2_680	0	1	2	2	59	293	PeanutMMs.bmp	SnoBall.bmp	12	11	0	u	1	0	0.672076	7	6	2.553333	2.733333	2	day2	1
BM2_680	0	1	2	2	60	296	PeanutMMs.bmp	Keeblerfudgestripes.bmp	12	11	0	i	1	1	0.911099	7	5	2.553333	2.886667	2	day2	1
BM2_680	0	1	2	2	61	299	Sourpatch.bmp	Chocolate_mm.bmp	13	14	1	u	2	1	1.134837	12	14	2.426667	2.273333	2	day2	1
BM2_680	0	1	2	2	62	306	Keeblerfudgestripes.bmp	PopTartsStrawberry.bmp	11	12	1	u	1	1	1.010597	5	3	2.886667	2.966667	2	day2	1
BM2_680	0	1	2	2	63	311	PayDay.bmp	Almondjoy.bmp	24	23	0	i	4	1	0.652381	28	26	1.546667	1.573333	2	day2	1
BM2_680	0	1	2	2	64	317	FamousAmos_small.bmp	PeanutMMs.bmp	11	12	1	u	1	1	1.067106	8	7	2.506667	2.553333	2	day2	1
BM2_680	0	1	2	2	65	320	Granolabar.bmp	Sourpatch.bmp	14	13	0	i	2	1	0.80216	10	12	2.466667	2.426667	2	day2	1
BM2_680	0	1	2	2	66	324	RitzBitz2.bmp	Keeblerfudgestripes.bmp	12	11	0	i	1	1	0.894909	9	5	2.486667	2.886667	2	day2	1
BM2_680	0	1	2	2	67	327	Granolabar.bmp	Ghiradelli_milk.bmp	14	13	0	i	2	1	0.998636	10	15	2.466667	2.273333	2	day2	1
BM2_680	0	1	2	2	68	330	Snickers.bmp	Oreos.bmp	13	14	1	i	2	0	0.829708	13	16	2.32	2.233333	2	day2	1
BM2_680	0	1	2	2	69	333	RitzBitz2.bmp	SnoBall.bmp	12	11	0	u	1	0	1.045412	9	6	2.486667	2.733333	2	day2	1
BM2_680	0	1	2	2	70	341	Sourpatch.bmp	Oreos.bmp	13	14	1	i	2	0	0.870197	12	16	2.426667	2.233333	2	day2	1
BM2_680	0	1	2	2	71	344	Almondjoy.bmp	100grand_small.bmp	23	24	1	u	4	1	0.637927	26	30	1.573333	1.52	2	day2	1
BM2_680	0	1	2	2	72	352	Skittles.bmp	FrootLoops.bmp	22	21	0	i	3	1	0.974707	21	22	2.08	1.986667	2	day2	1
BM2_682	0	1	1	1	1	0	Snickers.bmp	KitKat_small.bmp	12	11	0	u	1	0	0.721492	8	9	2.5	2.48	2	day2	1
BM2_682	0	1	1	1	2	10	ChipsAhoy_small.bmp	Sourpatch.bmp	23	24	1	u	4	1	0.645019	28	27	1.973333	1.98	2	day2	1
BM2_682	0	1	1	1	3	13	PayDay.bmp	Snickers.bmp	11	12	1	i	1	0	0.589108	3	8	2.953333	2.5	2	day2	1
BM2_682	0	1	1	1	4	16	Nutterbutter.bmp	Sourpatch.bmp	23	24	1	u	4	1	0.580847	24	27	1.993333	1.98	2	day2	1
BM2_682	0	1	1	1	5	20	Twinkie.bmp	Almondjoy.bmp	13	14	1	i	2	0	0.625601	14	15	2.04	2.026667	2	day2	1
BM2_682	0	1	1	1	6	24	Almondjoy.bmp	Laysclassic.bmp	14	13	0	i	2	1	0.909642	15	16	2.026667	2.02	2	day2	1
BM2_682	0	1	1	1	7	28	Butterfinger.bmp	PayDay.bmp	12	11	0	u	1	0	0.674392	6	3	2.933333	2.953333	2	day2	1
BM2_682	0	1	1	1	8	32	Cupcakes.bmp	Goldfish.bmp	21	22	1	u	3	1	0.719131	23	22	2.006667	2.013333	2	day2	1
BM2_682	0	1	1	1	9	38	CheesyDoritos.bmp	Cheezits.bmp	14	13	0	i	2	1	0.981048	13	10	2.26	2.326667	2	day2	1
BM2_682	0	1	1	1	10	42	PayDay.bmp	Oreos.bmp	11	12	1	i	1	0	0.65865	3	5	2.953333	2.946667	2	day2	1
BM2_682	0	1	1	1	11	45	Reeses.bmp	Snickers.bmp	11	12	1	u	1	1	0.785668	7	8	2.933333	2.5	2	day2	1
BM2_682	0	1	1	1	12	48	KitKat_small.bmp	Butterfinger.bmp	11	12	1	i	1	0	0.777418	9	6	2.48	2.933333	2	day2	1
BM2_682	0	1	1	1	13	52	RitzBitz2.bmp	ChipsAhoy_small.bmp	24	23	0	u	4	0	0.61345	26	28	1.98	1.973333	2	day2	1
BM2_682	0	1	1	1	14	61	ChipsAhoy_small.bmp	Ghiradelli_milk_Almonds.bmp	23	24	1	u	4	1	0.675972	28	29	1.973333	1.96	2	day2	1
BM2_682	0	1	1	1	15	68	Ghiradelli_milk_Almonds.bmp	100grand_small.bmp	24	23	0	i	4	1	0.743738	29	30	1.96	1.946667	2	day2	1
BM2_682	0	1	1	1	16	73	Milkduds.bmp	Twinkie.bmp	14	13	0	i	2	1	0.929479	12	14	2.3	2.04	2	day2	1
BM2_682	0	1	1	1	17	77	Oreos.bmp	KitKat_small.bmp	12	11	0	i	1	1	0.885217	5	9	2.946667	2.48	2	day2	1
BM2_682	0	1	1	1	18	80	TeddyGrahamschocolate.bmp	3Musketeers.bmp	22	21	0	u	3	0	0.925283	19	21	2.02	2.013333	2	day2	1
BM2_682	0	1	1	1	19	84	Whatchamacallit.bmp	3Musketeers.bmp	22	21	0	i	3	1	0.826002	20	21	2.02	2.013333	2	day2	1
BM2_682	0	1	1	1	20	93	RitzBitz2.bmp	Nutterbutter.bmp	24	23	0	i	4	1	1.128538	26	24	1.98	1.993333	2	day2	1
BM2_682	0	1	1	1	21	98	Milkduds.bmp	Laysclassic.bmp	14	13	0	i	2	1	0.618305	12	16	2.3	2.02	2	day2	1
BM2_682	0	1	1	1	22	101	Almondjoy.bmp	Cheezits.bmp	14	13	0	i	2	1	0.849335	15	10	2.026667	2.326667	2	day2	1
BM2_682	0	1	1	1	23	104	Twinkie.bmp	CheesyDoritos.bmp	13	14	1	u	2	1	0.825005	14	13	2.04	2.26	2	day2	1
BM2_682	0	1	1	1	24	108	MrGoodbar.bmp	Whatchamacallit.bmp	21	22	1	i	3	0	0.917051	17	20	2.02	2.02	2	day2	1
BM2_682	0	1	1	1	25	111	TeddyGrahamschocolate.bmp	Cupcakes.bmp	22	21	0	i	3	1	0.828574	19	23	2.02	2.006667	2	day2	1
BM2_682	0	1	1	1	26	114	Laysclassic.bmp	CheesyDoritos.bmp	13	14	1	u	2	1	0.67652	16	13	2.02	2.26	2	day2	1
BM2_682	0	1	1	1	27	123	TeddyGrahamschocolate.bmp	MrGoodbar.bmp	22	21	0	u	3	0	0.858389	19	17	2.02	2.02	2	day2	1
BM2_682	0	1	1	1	28	126	Milkduds.bmp	Cheezits.bmp	14	13	0	u	2	0	0.898129	12	10	2.3	2.326667	2	day2	1
BM2_682	0	1	1	1	29	130	Reeses.bmp	Oreos.bmp	11	12	1	u	1	1	0.646159	7	5	2.933333	2.946667	2	day2	1
BM2_682	0	1	1	1	30	135	Cupcakes.bmp	Whatchamacallit.bmp	21	22	1	u	3	1	0.583892	23	20	2.006667	2.02	2	day2	1
BM2_682	0	1	1	1	31	148	Goldfish.bmp	3Musketeers.bmp	22	21	0	i	3	1	0.723182	22	21	2.013333	2.013333	2	day2	1
BM2_682	0	1	1	1	32	151	Reeses.bmp	Butterfinger.bmp	11	12	1	i	1	0	1.066217	7	6	2.933333	2.933333	2	day2	1
BM2_682	0	1	1	1	33	154	MrGoodbar.bmp	Goldfish.bmp	21	22	1	u	3	1	0.921952	17	22	2.02	2.013333	2	day2	1
BM2_682	0	1	1	1	34	160	100grand_small.bmp	Sourpatch.bmp	23	24	1	i	4	0	1.000718	30	27	1.946667	1.98	2	day2	1
BM2_682	0	1	1	1	35	164	RitzBitz2.bmp	100grand_small.bmp	24	23	0	u	4	0	0.996754	26	30	1.98	1.946667	2	day2	1
BM2_682	0	1	1	1	36	168	Nutterbutter.bmp	Ghiradelli_milk_Almonds.bmp	23	24	1	u	4	1	0.769489	24	29	1.993333	1.96	2	day2	1
BM2_682	0	1	1	2	37	171	Oreos.bmp	KitKat_small.bmp	12	11	0	i	1	1	0.769321	5	9	2.946667	2.48	2	day2	1
BM2_682	0	1	1	2	38	177	Reeses.bmp	Oreos.bmp	11	12	1	u	1	1	0.872008	7	5	2.933333	2.946667	2	day2	1
BM2_682	0	1	1	2	39	181	Butterfinger.bmp	Reeses.bmp	12	11	0	u	1	0	0.908758	6	7	2.933333	2.933333	2	day2	1
BM2_682	0	1	1	2	40	187	Twinkie.bmp	CheesyDoritos.bmp	13	14	1	u	2	1	0.843533	14	13	2.04	2.26	2	day2	1
BM2_682	0	1	1	2	41	192	100grand_small.bmp	Sourpatch.bmp	23	24	1	i	4	0	0.820547	30	27	1.946667	1.98	2	day2	1
BM2_682	0	1	1	2	42	202	Cupcakes.bmp	Goldfish.bmp	21	22	1	u	3	1	0.815974	23	22	2.006667	2.013333	2	day2	1
BM2_682	0	1	1	2	43	212	Snickers.bmp	Reeses.bmp	12	11	0	i	1	1	1.027618	8	7	2.5	2.933333	2	day2	1
BM2_682	0	1	1	2	44	220	Sourpatch.bmp	ChipsAhoy_small.bmp	24	23	0	u	4	0	0.820385	27	28	1.98	1.973333	2	day2	1
BM2_682	0	1	1	2	45	224	100grand_small.bmp	RitzBitz2.bmp	23	24	1	i	4	0	0.729156	30	26	1.946667	1.98	2	day2	1
BM2_682	0	1	1	2	46	227	CheesyDoritos.bmp	Cheezits.bmp	14	13	0	u	2	0	0.952913	13	10	2.26	2.326667	2	day2	1
BM2_682	0	1	1	2	47	230	Sourpatch.bmp	Nutterbutter.bmp	24	23	0	i	4	1	0.719922	27	24	1.98	1.993333	2	day2	1
BM2_682	0	1	1	2	48	233	Cupcakes.bmp	TeddyGrahamschocolate.bmp	21	22	1	u	3	1	0.695661	23	19	2.006667	2.02	2	day2	1
BM2_682	0	1	1	2	49	241	RitzBitz2.bmp	Nutterbutter.bmp	24	23	0	u	4	0	1.264447	26	24	1.98	1.993333	2	day2	1
BM2_682	0	1	1	2	50	244	KitKat_small.bmp	Snickers.bmp	11	12	1	u	1	1	0.992115	9	8	2.48	2.5	2	day2	1
BM2_682	0	1	1	2	51	252	Ghiradelli_milk_Almonds.bmp	ChipsAhoy_small.bmp	24	23	0	i	4	1	0.672979	29	28	1.96	1.973333	2	day2	1
BM2_682	0	1	1	2	52	259	ChipsAhoy_small.bmp	RitzBitz2.bmp	23	24	1	i	4	0	0.676718	28	26	1.973333	1.98	2	day2	1
BM2_682	0	1	1	2	53	262	Goldfish.bmp	MrGoodbar.bmp	22	21	0	u	3	0	1.108501	22	17	2.013333	2.02	2	day2	1
BM2_682	0	1	1	2	54	269	Laysclassic.bmp	CheesyDoritos.bmp	13	14	1	u	2	1	0.720273	16	13	2.02	2.26	2	day2	1
BM2_682	0	1	1	2	55	273	TeddyGrahamschocolate.bmp	MrGoodbar.bmp	22	21	0	i	3	1	0.88499	19	17	2.02	2.02	2	day2	1
BM2_682	0	1	1	2	56	282	Laysclassic.bmp	Milkduds.bmp	13	14	1	i	2	0	1.379503	16	12	2.02	2.3	2	day2	1
BM2_682	0	1	1	2	57	286	Goldfish.bmp	3Musketeers.bmp	22	21	0	i	3	1	0.855572	22	21	2.013333	2.013333	2	day2	1
BM2_682	0	1	1	2	58	300	MrGoodbar.bmp	Whatchamacallit.bmp	21	22	1	u	3	1	1.095802	17	20	2.02	2.02	2	day2	1
BM2_682	0	1	1	2	59	303	Cupcakes.bmp	Whatchamacallit.bmp	21	22	1	u	3	1	0.66288	23	20	2.006667	2.02	2	day2	1
BM2_682	0	1	1	2	60	306	Twinkie.bmp	Milkduds.bmp	13	14	1	u	2	1	1.038593	14	12	2.04	2.3	2	day2	1
BM2_682	0	1	1	2	61	309	Butterfinger.bmp	PayDay.bmp	12	11	0	u	1	0	0.717636	6	3	2.933333	2.953333	2	day2	1
BM2_682	0	1	1	2	62	312	Ghiradelli_milk_Almonds.bmp	100grand_small.bmp	24	23	0	u	4	0	0.92462	29	30	1.96	1.946667	2	day2	1
BM2_682	0	1	1	2	63	315	Milkduds.bmp	Cheezits.bmp	14	13	0	u	2	0	0.741137	12	10	2.3	2.326667	2	day2	1
BM2_682	0	1	1	2	64	318	PayDay.bmp	Snickers.bmp	11	12	1	i	1	0	0.916054	3	8	2.953333	2.5	2	day2	1
BM2_682	0	1	1	2	65	324	Butterfinger.bmp	KitKat_small.bmp	12	11	0	i	1	1	0.874889	6	9	2.933333	2.48	2	day2	1
BM2_682	0	1	1	2	66	328	Almondjoy.bmp	Cheezits.bmp	14	13	0	u	2	0	1.015574	15	10	2.026667	2.326667	2	day2	1
BM2_682	0	1	1	2	67	333	Twinkie.bmp	Almondjoy.bmp	13	14	1	u	2	1	1.009417	14	15	2.04	2.026667	2	day2	1
BM2_682	0	1	1	2	68	339	Oreos.bmp	PayDay.bmp	12	11	0	i	1	1	0.840182	5	3	2.946667	2.953333	2	day2	1
BM2_682	0	1	1	2	69	342	3Musketeers.bmp	Whatchamacallit.bmp	21	22	1	u	3	1	0.887155	21	20	2.013333	2.02	2	day2	1
BM2_682	0	1	1	2	70	345	Laysclassic.bmp	Almondjoy.bmp	13	14	1	u	2	1	0.814888	16	15	2.02	2.026667	2	day2	1
BM2_682	0	1	1	2	71	349	Ghiradelli_milk_Almonds.bmp	Nutterbutter.bmp	24	23	0	u	4	0	1.235701	29	24	1.96	1.993333	2	day2	1
BM2_682	0	1	1	2	72	352	3Musketeers.bmp	TeddyGrahamschocolate.bmp	21	22	1	u	3	1	1.010666	21	19	2.013333	2.02	2	day2	1
BM2_654	0	1	1	1	1	0	Snickers.bmp	Fritos.bmp	22	21	0	i	3	1	0.761429	20	21	0.833333	0.793333	3	day2	1
BM2_654	0	1	1	1	2	10	Milano.bmp	FamousAmos_small.bmp	11	12	1	i	1	0	1.478267	9	5	1.28	1.52	3	day2	1
BM2_654	0	1	1	1	3	13	Hersheymilk_several.bmp	Snickers.bmp	21	22	1	i	3	0	1.077377	17	20	0.88	0.833333	3	day2	1
BM2_654	0	1	1	1	4	16	MilkyWay.bmp	ChipsAhoy_small.bmp	11	12	1	u	1	1	1.388404	7	8	1.38	1.366667	3	day2	1
BM2_654	0	1	1	1	5	20	Chocolate_mm.bmp	Fritos.bmp	22	21	0	i	3	1	0.82587	22	21	0.773333	0.793333	3	day2	1
BM2_654	0	1	1	1	6	24	MilkyWay.bmp	FamousAmos_small.bmp	11	12	1	i	1	0	0.669921	7	5	1.38	1.52	3	day2	1
BM2_654	0	1	1	1	7	28	Snickers.bmp	HoHo.bmp	22	21	0	u	3	0	1.458643	20	23	0.833333	0.746667	3	day2	1
BM2_654	0	1	1	1	8	32	100grand_small.bmp	Jollyrancherred.bmp	14	13	0	i	2	1	0.751434	15	10	0.893333	1.226667	3	day2	1
BM2_654	0	1	1	1	9	38	Cheetos.bmp	Hersheykisses.bmp	24	23	0	u	4	0	0.900895	27	28	0.68	0.553333	3	day2	1
BM2_654	0	1	1	1	10	42	Cheezits.bmp	Skittles.bmp	13	14	1	i	2	0	0.994929	14	13	0.906667	1.026667	3	day2	1
BM2_654	0	1	1	1	11	45	ChipsAhoy_small.bmp	Milano.bmp	12	11	0	i	1	1	0.801961	8	9	1.366667	1.28	3	day2	1
BM2_654	0	1	1	1	12	48	Ghiradelli_milk_Almonds.bmp	FrootLoops.bmp	24	23	0	u	4	0	1.161681	29	30	0.54	0.446667	3	day2	1
BM2_654	0	1	1	1	13	52	Twix.bmp	100grand_small.bmp	13	14	1	i	2	0	0.781732	16	15	0.893333	0.893333	3	day2	1
BM2_654	0	1	1	1	14	61	Riprolls.bmp	Fritos.bmp	22	21	0	i	3	1	0.836241	19	21	0.846667	0.793333	3	day2	1
BM2_654	0	1	1	1	15	68	FrootLoops.bmp	Cheetos.bmp	23	24	1	i	4	0	0.960008	30	27	0.446667	0.68	3	day2	1
BM2_654	0	1	1	1	16	73	SourSkittles.bmp	ChipsAhoy_small.bmp	11	12	1	u	1	1	0.97777	3	8	1.74	1.366667	3	day2	1
BM2_654	0	1	1	1	17	77	PopTartsStrawberry.bmp	Ghiradelli_milk_Almonds.bmp	23	24	1	i	4	0	1.214533	24	29	0.746667	0.54	3	day2	1
BM2_654	0	1	1	1	18	80	Hersheymilk_several.bmp	Riprolls.bmp	21	22	1	u	3	1	0.853539	17	19	0.88	0.846667	3	day2	1
BM2_654	0	1	1	1	19	84	Sourpatch.bmp	Hersheykisses.bmp	24	23	0	u	4	0	0.794301	26	28	0.72	0.553333	3	day2	1
BM2_654	0	1	1	1	20	93	Hersheymilk_several.bmp	Chocolate_mm.bmp	21	22	1	i	3	0	0.752802	17	22	0.88	0.773333	3	day2	1
BM2_654	0	1	1	1	21	98	SourSkittles.bmp	Oreos.bmp	11	12	1	i	1	0	1.122559	3	6	1.74	1.493333	3	day2	1
BM2_654	0	1	1	1	22	101	PopTartsCinnamon.bmp	Jollyrancherred.bmp	14	13	0	i	2	1	0.665583	12	10	1.026667	1.226667	3	day2	1
BM2_654	0	1	1	1	23	104	Oreos.bmp	MilkyWay.bmp	12	11	0	u	1	0	1.329294	6	7	1.493333	1.38	3	day2	1
BM2_654	0	1	1	1	24	108	Skittles.bmp	Jollyrancherred.bmp	14	13	0	x	2	NA	NA	13	10	1.026667	1.226667	3	day2	1
BM2_654	0	1	1	1	25	111	Cheezits.bmp	100grand_small.bmp	13	14	1	i	2	0	0.660779	14	15	0.906667	0.893333	3	day2	1
BM2_654	0	1	1	1	26	114	Sourpatch.bmp	FrootLoops.bmp	24	23	0	u	4	0	0.532786	26	30	0.72	0.446667	3	day2	1
BM2_654	0	1	1	1	27	123	Riprolls.bmp	HoHo.bmp	22	21	0	i	3	1	0.626629	19	23	0.846667	0.746667	3	day2	1
BM2_654	0	1	1	1	28	126	HoHo.bmp	Chocolate_mm.bmp	21	22	1	i	3	0	0.586376	23	22	0.746667	0.773333	3	day2	1
BM2_654	0	1	1	1	29	130	FamousAmos_small.bmp	SourSkittles.bmp	12	11	0	i	1	1	0.702358	5	3	1.52	1.74	3	day2	1
BM2_654	0	1	1	1	30	135	Twix.bmp	PopTartsCinnamon.bmp	13	14	1	u	2	1	0.776172	16	12	0.893333	1.026667	3	day2	1
BM2_654	0	1	1	1	31	148	PopTartsCinnamon.bmp	Cheezits.bmp	14	13	0	u	2	0	0.827421	12	14	1.026667	0.906667	3	day2	1
BM2_654	0	1	1	1	32	151	Cheetos.bmp	PopTartsStrawberry.bmp	24	23	0	u	4	0	1.018473	27	24	0.68	0.746667	3	day2	1
BM2_654	0	1	1	1	33	154	Twix.bmp	Skittles.bmp	13	14	1	i	2	0	1.314202	16	13	0.893333	1.026667	3	day2	1
BM2_654	0	1	1	1	34	160	Milano.bmp	Oreos.bmp	11	12	1	i	1	0	0.752938	9	6	1.28	1.493333	3	day2	1
BM2_654	0	1	1	1	35	164	Ghiradelli_milk_Almonds.bmp	Hersheykisses.bmp	24	23	0	u	4	0	0.908918	29	28	0.54	0.553333	3	day2	1
BM2_654	0	1	1	1	36	168	PopTartsStrawberry.bmp	Sourpatch.bmp	23	24	1	i	4	0	0.68976	24	26	0.746667	0.72	3	day2	1
BM2_654	0	1	1	2	37	171	PopTartsStrawberry.bmp	Ghiradelli_milk_Almonds.bmp	23	24	1	i	4	0	0.777466	24	29	0.746667	0.54	3	day2	1
BM2_654	0	1	1	2	38	177	ChipsAhoy_small.bmp	SourSkittles.bmp	12	11	0	i	1	1	0.976263	8	3	1.366667	1.74	3	day2	1
BM2_654	0	1	1	2	39	181	100grand_small.bmp	Jollyrancherred.bmp	14	13	0	i	2	1	0.644272	15	10	0.893333	1.226667	3	day2	1
BM2_654	0	1	1	2	40	187	Ghiradelli_milk_Almonds.bmp	FrootLoops.bmp	24	23	0	u	4	0	0.763762	29	30	0.54	0.446667	3	day2	1
BM2_654	0	1	1	2	41	192	Twix.bmp	100grand_small.bmp	13	14	1	i	2	0	0.684804	16	15	0.893333	0.893333	3	day2	1
BM2_654	0	1	1	2	42	202	Hersheymilk_several.bmp	Chocolate_mm.bmp	21	22	1	i	3	0	0.65632	17	22	0.88	0.773333	3	day2	1
BM2_654	0	1	1	2	43	212	Oreos.bmp	MilkyWay.bmp	12	11	0	u	1	0	0.915832	6	7	1.493333	1.38	3	day2	1
BM2_654	0	1	1	2	44	220	Riprolls.bmp	Fritos.bmp	22	21	0	i	3	1	0.660611	19	21	0.846667	0.793333	3	day2	1
BM2_654	0	1	1	2	45	224	Jollyrancherred.bmp	Skittles.bmp	13	14	1	u	2	1	0.977291	10	13	1.226667	1.026667	3	day2	1
BM2_654	0	1	1	2	46	227	Hersheykisses.bmp	Cheetos.bmp	23	24	1	i	4	0	0.529057	28	27	0.553333	0.68	3	day2	1
BM2_654	0	1	1	2	47	230	PopTartsCinnamon.bmp	Cheezits.bmp	14	13	0	u	2	0	0.736126	12	14	1.026667	0.906667	3	day2	1
BM2_654	0	1	1	2	48	233	Jollyrancherred.bmp	PopTartsCinnamon.bmp	13	14	1	i	2	0	1.159858	10	12	1.226667	1.026667	3	day2	1
BM2_654	0	1	1	2	49	241	Milano.bmp	ChipsAhoy_small.bmp	11	12	1	u	1	1	0.864647	9	8	1.28	1.366667	3	day2	1
BM2_654	0	1	1	2	50	244	Milano.bmp	FamousAmos_small.bmp	11	12	1	i	1	0	0.57638	9	5	1.28	1.52	3	day2	1
BM2_654	0	1	1	2	51	252	Riprolls.bmp	Hersheymilk_several.bmp	22	21	0	i	3	1	0.665181	19	17	0.846667	0.88	3	day2	1
BM2_654	0	1	1	2	52	259	Sourpatch.bmp	PopTartsStrawberry.bmp	24	23	0	u	4	0	0.88485	26	24	0.72	0.746667	3	day2	1
BM2_654	0	1	1	2	53	262	ChipsAhoy_small.bmp	MilkyWay.bmp	12	11	0	i	1	1	1.012677	8	7	1.366667	1.38	3	day2	1
BM2_654	0	1	1	2	54	269	Fritos.bmp	Snickers.bmp	21	22	1	u	3	1	1.120466	21	20	0.793333	0.833333	3	day2	1
BM2_654	0	1	1	2	55	273	Sourpatch.bmp	FrootLoops.bmp	24	23	0	u	4	0	1.132002	26	30	0.72	0.446667	3	day2	1
BM2_654	0	1	1	2	56	282	Twix.bmp	Skittles.bmp	13	14	1	i	2	0	0.707716	16	13	0.893333	1.026667	3	day2	1
BM2_654	0	1	1	2	57	286	Cheetos.bmp	PopTartsStrawberry.bmp	24	23	0	u	4	0	0.711777	27	24	0.68	0.746667	3	day2	1
BM2_654	0	1	1	2	58	300	Milano.bmp	Oreos.bmp	11	12	1	i	1	0	0.808004	9	6	1.28	1.493333	3	day2	1
BM2_654	0	1	1	2	59	303	HoHo.bmp	Snickers.bmp	21	22	1	i	3	0	1.063039	23	20	0.746667	0.833333	3	day2	1
BM2_654	0	1	1	2	60	306	PopTartsCinnamon.bmp	Twix.bmp	14	13	0	u	2	0	1.334754	12	16	1.026667	0.893333	3	day2	1
BM2_654	0	1	1	2	61	309	SourSkittles.bmp	Oreos.bmp	11	12	1	u	1	1	1.037804	3	6	1.74	1.493333	3	day2	1
BM2_654	0	1	1	2	62	312	HoHo.bmp	Chocolate_mm.bmp	21	22	1	i	3	0	0.60555	23	22	0.746667	0.773333	3	day2	1
BM2_654	0	1	1	2	63	315	Cheetos.bmp	FrootLoops.bmp	24	23	0	u	4	0	0.972567	27	30	0.68	0.446667	3	day2	1
BM2_654	0	1	1	2	64	318	HoHo.bmp	Riprolls.bmp	21	22	1	u	3	1	1.172299	23	19	0.746667	0.846667	3	day2	1
BM2_654	0	1	1	2	65	324	FamousAmos_small.bmp	MilkyWay.bmp	12	11	0	u	1	0	1.363084	5	7	1.52	1.38	3	day2	1
BM2_654	0	1	1	2	66	328	Hersheykisses.bmp	Sourpatch.bmp	23	24	1	x	4	NA	NA	28	26	0.553333	0.72	3	day2	1
BM2_654	0	1	1	2	67	333	Hersheymilk_several.bmp	Snickers.bmp	21	22	1	i	3	0	0.513575	17	20	0.88	0.833333	3	day2	1
BM2_654	0	1	1	2	68	339	FamousAmos_small.bmp	SourSkittles.bmp	12	11	0	i	1	1	0.456339	5	3	1.52	1.74	3	day2	1
BM2_654	0	1	1	2	69	342	Chocolate_mm.bmp	Fritos.bmp	22	21	0	i	3	1	0.70338	22	21	0.773333	0.793333	3	day2	1
BM2_654	0	1	1	2	70	345	Cheezits.bmp	100grand_small.bmp	13	14	1	i	2	0	0.807117	14	15	0.906667	0.893333	3	day2	1
BM2_654	0	1	1	2	71	349	Skittles.bmp	Cheezits.bmp	14	13	0	u	2	0	0.883867	13	14	1.026667	0.906667	3	day2	1
BM2_654	0	1	1	2	72	352	Ghiradelli_milk_Almonds.bmp	Hersheykisses.bmp	24	23	0	u	4	0	0.978888	29	28	0.54	0.553333	3	day2	1
BM2_655	0	2	1	1	1	0	Cheezits.bmp	Funyuns_small.bmp	24	23	0	i	4	1	0.724597	13	10	1.293333	1.433333	3	day2	1
BM2_655	0	2	1	1	2	10	Goldfish.bmp	Skittles.bmp	21	22	1	i	3	0	1.032856	7	6	1.506667	1.526667	3	day2	1
BM2_655	0	2	1	1	3	13	Skittles.bmp	CheesyDoritos.bmp	22	21	0	i	3	1	1.21655	6	9	1.526667	1.46	3	day2	1
BM2_655	0	2	1	1	4	16	PringlesRed.bmp	Almondjoy.bmp	14	13	0	u	2	0	0.767603	26	28	0.773333	0.733333	3	day2	1
BM2_655	0	2	1	1	5	20	Doritosranch.bmp	Funyuns_small.bmp	24	23	0	i	4	1	0.732356	15	10	1.226667	1.433333	3	day2	1
BM2_655	0	2	1	1	6	24	Jollyrancherred.bmp	Almondjoy.bmp	14	13	0	i	2	1	1.049098	29	28	0.66	0.733333	3	day2	1
BM2_655	0	2	1	1	7	28	Funyuns_small.bmp	Laysclassic.bmp	23	24	1	u	4	1	0.733171	10	12	1.433333	1.32	3	day2	1
BM2_655	0	2	1	1	8	32	Ghiradelli_milk_Almonds.bmp	Skittles.bmp	21	22	1	u	3	1	0.865911	3	6	1.733333	1.526667	3	day2	1
BM2_655	0	2	1	1	9	38	PeanutMMs.bmp	Cheezits.bmp	23	24	1	u	4	1	0.696676	16	13	1.06	1.293333	3	day2	1
BM2_655	0	2	1	1	10	42	Doritosranch.bmp	PeanutMMs.bmp	24	23	0	i	4	1	0.749377	15	16	1.226667	1.06	3	day2	1
BM2_655	0	2	1	1	11	45	SourSkittles.bmp	Jollyrancherred.bmp	13	14	1	x	2	NA	NA	30	29	0.653333	0.66	3	day2	1
BM2_655	0	2	1	1	12	48	Cheetos.bmp	Goldfish.bmp	22	21	0	u	3	0	0.98815	8	7	1.48	1.506667	3	day2	1
BM2_655	0	2	1	1	13	52	Doritosranch.bmp	Granolabar.bmp	24	23	0	u	4	0	0.696908	15	14	1.226667	1.253333	3	day2	1
BM2_655	0	2	1	1	14	61	Fritos.bmp	AnimalCrackers.bmp	11	12	1	u	1	1	0.670744	23	20	0.993333	1.02	3	day2	1
BM2_655	0	2	1	1	15	68	Granolabar.bmp	Cheezits.bmp	23	24	1	i	4	0	0.779225	14	13	1.253333	1.293333	3	day2	1
BM2_655	0	2	1	1	16	73	Ghiradelli_milk_Almonds.bmp	Ghiradelli_milk.bmp	21	22	1	i	3	0	1.036963	3	5	1.733333	1.54	3	day2	1
BM2_655	0	2	1	1	17	77	FamousAmos_small.bmp	PringlesRed.bmp	13	14	1	i	2	0	0.64102	24	26	0.98	0.773333	3	day2	1
BM2_655	0	2	1	1	18	80	Toberlorone.bmp	Fritos.bmp	12	11	0	i	1	1	0.496712	19	23	1.026667	0.993333	3	day2	1
BM2_655	0	2	1	1	19	84	Ghiradelli_milk.bmp	CheesyDoritos.bmp	22	21	0	i	3	1	0.532783	5	9	1.54	1.46	3	day2	1
BM2_655	0	2	1	1	20	93	Hersheymilk_several.bmp	SourSkittles.bmp	14	13	0	i	2	1	0.6993	27	30	0.74	0.653333	3	day2	1
BM2_655	0	2	1	1	21	98	Granolabar.bmp	Laysclassic.bmp	23	24	1	i	4	0	0.589021	14	12	1.253333	1.32	3	day2	1
BM2_655	0	2	1	1	22	101	Hersheykisses.bmp	Chocolate_mm.bmp	11	12	1	i	1	0	0.67677	17	22	1.026667	1.006667	3	day2	1
BM2_655	0	2	1	1	23	104	SourSkittles.bmp	PringlesRed.bmp	13	14	1	u	2	1	0.515787	30	26	0.653333	0.773333	3	day2	1
BM2_655	0	2	1	1	24	108	Ghiradelli_milk.bmp	Goldfish.bmp	22	21	0	u	3	0	0.992559	5	7	1.54	1.506667	3	day2	1
BM2_655	0	2	1	1	25	111	Almondjoy.bmp	Hersheymilk_several.bmp	13	14	1	i	2	0	0.52758	28	27	0.733333	0.74	3	day2	1
BM2_655	0	2	1	1	26	114	Toberlorone.bmp	Hersheykisses.bmp	12	11	0	i	1	1	0.543323	19	17	1.026667	1.026667	3	day2	1
BM2_655	0	2	1	1	27	123	FrootLoops.bmp	Toberlorone.bmp	11	12	1	i	1	0	0.573148	21	19	1.013333	1.026667	3	day2	1
BM2_655	0	2	1	1	28	126	FamousAmos_small.bmp	Hersheymilk_several.bmp	13	14	1	i	2	0	0.652894	24	27	0.98	0.74	3	day2	1
BM2_655	0	2	1	1	29	130	PeanutMMs.bmp	Laysclassic.bmp	23	24	1	u	4	1	0.513586	16	12	1.06	1.32	3	day2	1
BM2_655	0	2	1	1	30	135	Ghiradelli_milk_Almonds.bmp	Cheetos.bmp	21	22	1	i	3	0	0.515405	3	8	1.733333	1.48	3	day2	1
BM2_655	0	2	1	1	31	148	Jollyrancherred.bmp	FamousAmos_small.bmp	14	13	0	i	2	1	0.54957	29	24	0.66	0.98	3	day2	1
BM2_655	0	2	1	1	32	151	Chocolate_mm.bmp	Fritos.bmp	12	11	0	u	1	0	0.733647	22	23	1.006667	0.993333	3	day2	1
BM2_655	0	2	1	1	33	154	AnimalCrackers.bmp	Hersheykisses.bmp	12	11	0	u	1	0	0.652726	20	17	1.02	1.026667	3	day2	1
BM2_655	0	2	1	1	34	160	Chocolate_mm.bmp	FrootLoops.bmp	12	11	0	u	1	0	0.531456	22	21	1.006667	1.013333	3	day2	1
BM2_655	0	2	1	1	35	164	FrootLoops.bmp	AnimalCrackers.bmp	11	12	1	i	1	0	0.424232	21	20	1.013333	1.02	3	day2	1
BM2_655	0	2	1	1	36	168	Cheetos.bmp	CheesyDoritos.bmp	22	21	0	i	3	1	0.588924	8	9	1.48	1.46	3	day2	1
BM2_655	0	2	1	2	37	171	Goldfish.bmp	Skittles.bmp	21	22	1	u	3	1	0.707958	7	6	1.506667	1.526667	3	day2	1
BM2_655	0	2	1	2	38	177	Toberlorone.bmp	Hersheykisses.bmp	12	11	0	i	1	1	0.498781	19	17	1.026667	1.026667	3	day2	1
BM2_655	0	2	1	2	39	181	PringlesRed.bmp	Almondjoy.bmp	14	13	0	u	2	0	0.551438	26	28	0.773333	0.733333	3	day2	1
BM2_655	0	2	1	2	40	187	Cheezits.bmp	Granolabar.bmp	24	23	0	u	4	0	0.597603	13	14	1.293333	1.253333	3	day2	1
BM2_655	0	2	1	2	41	192	Hersheymilk_several.bmp	Almondjoy.bmp	14	13	0	u	2	0	0.591958	27	28	0.74	0.733333	3	day2	1
BM2_655	0	2	1	2	42	202	Doritosranch.bmp	Granolabar.bmp	24	23	0	u	4	0	0.651561	15	14	1.226667	1.253333	3	day2	1
BM2_655	0	2	1	2	43	212	FrootLoops.bmp	AnimalCrackers.bmp	11	12	1	i	1	0	0.74238	21	20	1.013333	1.02	3	day2	1
BM2_655	0	2	1	2	44	220	Hersheykisses.bmp	Chocolate_mm.bmp	11	12	1	i	1	0	0.903835	17	22	1.026667	1.006667	3	day2	1
BM2_655	0	2	1	2	45	224	Toberlorone.bmp	FrootLoops.bmp	12	11	0	i	1	1	0.708596	19	21	1.026667	1.013333	3	day2	1
BM2_655	0	2	1	2	46	227	Almondjoy.bmp	Jollyrancherred.bmp	13	14	1	i	2	0	0.955656	28	29	0.733333	0.66	3	day2	1
BM2_655	0	2	1	2	47	230	SourSkittles.bmp	Jollyrancherred.bmp	13	14	1	i	2	0	0.875385	30	29	0.653333	0.66	3	day2	1
BM2_655	0	2	1	2	48	233	PeanutMMs.bmp	Cheezits.bmp	23	24	1	u	4	1	0.642425	16	13	1.06	1.293333	3	day2	1
BM2_655	0	2	1	2	49	241	Doritosranch.bmp	PeanutMMs.bmp	24	23	0	i	4	1	0.691921	15	16	1.226667	1.06	3	day2	1
BM2_655	0	2	1	2	50	244	CheesyDoritos.bmp	Skittles.bmp	21	22	1	u	3	1	0.594864	9	6	1.46	1.526667	3	day2	1
BM2_655	0	2	1	2	51	252	Funyuns_small.bmp	Cheezits.bmp	23	24	1	u	4	1	0.63645	10	13	1.433333	1.293333	3	day2	1
BM2_655	0	2	1	2	52	259	Fritos.bmp	Chocolate_mm.bmp	11	12	1	u	1	1	0.680213	23	22	0.993333	1.006667	3	day2	1
BM2_655	0	2	1	2	53	262	Ghiradelli_milk_Almonds.bmp	Cheetos.bmp	21	22	1	i	3	0	1.031186	3	8	1.733333	1.48	3	day2	1
BM2_655	0	2	1	2	54	269	Laysclassic.bmp	PeanutMMs.bmp	24	23	0	i	4	1	0.875654	12	16	1.32	1.06	3	day2	1
BM2_655	0	2	1	2	55	273	AnimalCrackers.bmp	Fritos.bmp	12	11	0	i	1	1	0.5118	20	23	1.02	0.993333	3	day2	1
BM2_655	0	2	1	2	56	282	Goldfish.bmp	Cheetos.bmp	21	22	1	i	3	0	0.66112	7	8	1.506667	1.48	3	day2	1
BM2_655	0	2	1	2	57	286	Hersheymilk_several.bmp	FamousAmos_small.bmp	14	13	0	i	2	1	1.099035	27	24	0.74	0.98	3	day2	1
BM2_655	0	2	1	2	58	300	SourSkittles.bmp	Hersheymilk_several.bmp	13	14	1	u	2	1	1.202509	30	27	0.653333	0.74	3	day2	1
BM2_655	0	2	1	2	59	303	Laysclassic.bmp	Funyuns_small.bmp	24	23	0	i	4	1	0.52226	12	10	1.32	1.433333	3	day2	1
BM2_655	0	2	1	2	60	306	Ghiradelli_milk.bmp	Ghiradelli_milk_Almonds.bmp	22	21	0	i	3	1	1.073348	5	3	1.54	1.733333	3	day2	1
BM2_655	0	2	1	2	61	309	Skittles.bmp	Ghiradelli_milk_Almonds.bmp	22	21	0	i	3	1	0.521124	6	3	1.526667	1.733333	3	day2	1
BM2_655	0	2	1	2	62	312	Hersheykisses.bmp	AnimalCrackers.bmp	11	12	1	i	1	0	0.664063	17	20	1.026667	1.02	3	day2	1
BM2_655	0	2	1	2	63	315	Jollyrancherred.bmp	FamousAmos_small.bmp	14	13	0	i	2	1	0.623766	29	24	0.66	0.98	3	day2	1
BM2_655	0	2	1	2	64	318	Ghiradelli_milk.bmp	CheesyDoritos.bmp	22	21	0	i	3	1	0.942866	5	9	1.54	1.46	3	day2	1
BM2_655	0	2	1	2	65	324	CheesyDoritos.bmp	Cheetos.bmp	21	22	1	i	3	0	1.021658	9	8	1.46	1.48	3	day2	1
BM2_655	0	2	1	2	66	328	FrootLoops.bmp	Chocolate_mm.bmp	11	12	1	i	1	0	0.570436	21	22	1.013333	1.006667	3	day2	1
BM2_655	0	2	1	2	67	333	Doritosranch.bmp	Funyuns_small.bmp	24	23	0	i	4	1	0.556141	15	10	1.226667	1.433333	3	day2	1
BM2_655	0	2	1	2	68	339	Fritos.bmp	Toberlorone.bmp	11	12	1	u	1	1	0.554938	23	19	0.993333	1.026667	3	day2	1
BM2_655	0	2	1	2	69	342	PringlesRed.bmp	SourSkittles.bmp	14	13	0	u	2	0	0.650636	26	30	0.773333	0.653333	3	day2	1
BM2_655	0	2	1	2	70	345	Goldfish.bmp	Ghiradelli_milk.bmp	21	22	1	i	3	0	0.633706	7	5	1.506667	1.54	3	day2	1
BM2_655	0	2	1	2	71	349	PringlesRed.bmp	FamousAmos_small.bmp	14	13	0	u	2	0	0.854451	26	24	0.773333	0.98	3	day2	1
BM2_655	0	2	1	2	72	352	Granolabar.bmp	Laysclassic.bmp	23	24	1	i	4	0	0.557488	14	12	1.253333	1.32	3	day2	1
BM2_656	0	1	2	1	1	0	FamousAmos_small.bmp	Hersheymilk_several.bmp	21	22	1	u	3	1	1.053854	22	21	2.253333	2.273333	3	day2	1
BM2_656	0	1	2	1	2	9	MilkyWay.bmp	CheesyDoritos.bmp	14	13	0	u	2	0	1.429795	14	12	2.566667	2.646667	3	day2	1
BM2_656	0	1	2	1	3	12	Laysclassic.bmp	Riprolls.bmp	13	14	1	u	2	1	1.036814	15	10	2.526667	2.686667	3	day2	1
BM2_656	0	1	2	1	4	17	MilkyWay.bmp	SourSkittles.bmp	14	13	0	u	2	0	0.942596	14	13	2.566667	2.58	3	day2	1
BM2_656	0	1	2	1	5	26	Butterfinger.bmp	Milkduds.bmp	23	24	1	u	4	1	1.013078	27	30	1.993333	1.766667	3	day2	1
BM2_656	0	1	2	1	6	32	Butterfinger.bmp	Hersheykisses.bmp	23	24	1	u	4	1	1.011748	27	28	1.993333	1.986667	3	day2	1
BM2_656	0	1	2	1	7	35	ChipsAhoy_small.bmp	Goldfish.bmp	21	22	1	x	3	NA	NA	20	17	2.28	2.52	3	day2	1
BM2_656	0	1	2	1	8	48	3Musketeers.bmp	Hersheykisses.bmp	23	24	1	u	4	1	0.646075	26	28	2	1.986667	3	day2	1
BM2_656	0	1	2	1	9	58	Goldfish.bmp	Cheezits.bmp	22	21	0	i	3	1	0.680905	17	19	2.52	2.326667	3	day2	1
BM2_656	0	1	2	1	10	63	Laysclassic.bmp	Chocolate_mm.bmp	13	14	1	u	2	1	0.58658	15	16	2.526667	2.52	3	day2	1
BM2_656	0	1	2	1	11	66	ChipsAhoy_small.bmp	Hersheymilk_several.bmp	21	22	1	u	3	1	0.657165	20	21	2.28	2.273333	3	day2	1
BM2_656	0	1	2	1	12	69	Ghiradelli_milk_Almonds.bmp	Ghiradelli_milk.bmp	12	11	0	i	1	1	0.873423	9	5	2.686667	2.926667	3	day2	1
BM2_656	0	1	2	1	13	72	FrootLoops.bmp	Cheezits.bmp	22	21	0	i	3	1	0.592687	23	19	2.253333	2.326667	3	day2	1
BM2_656	0	1	2	1	14	82	PringlesRed.bmp	Ghiradelli_milk.bmp	12	11	0	i	1	1	1.028634	7	5	2.726667	2.926667	3	day2	1
BM2_656	0	1	2	1	15	85	Toberlorone.bmp	Doritosranch.bmp	12	11	0	i	1	1	0.9317	3	8	2.966667	2.7	3	day2	1
BM2_656	0	1	2	1	16	95	Chocolate_mm.bmp	SourSkittles.bmp	14	13	0	u	2	0	0.927218	16	13	2.52	2.58	3	day2	1
BM2_656	0	1	2	1	17	98	Riprolls.bmp	CheesyDoritos.bmp	14	13	0	i	2	1	0.598958	10	12	2.686667	2.646667	3	day2	1
BM2_656	0	1	2	1	18	101	SourSkittles.bmp	Riprolls.bmp	13	14	1	i	2	0	1.134001	13	10	2.58	2.686667	3	day2	1
BM2_656	0	1	2	1	19	105	FrootLoops.bmp	ChipsAhoy_small.bmp	22	21	0	i	3	1	0.682711	23	20	2.253333	2.28	3	day2	1
BM2_656	0	1	2	1	20	109	Doritosranch.bmp	Ghiradelli_milk_Almonds.bmp	11	12	1	u	1	1	1.039442	8	9	2.7	2.686667	3	day2	1
BM2_656	0	1	2	1	21	113	Butterfinger.bmp	KitKat_small.bmp	23	24	1	u	4	1	0.691493	27	24	1.993333	2.22	3	day2	1
BM2_656	0	1	2	1	22	119	Toberlorone.bmp	Ghiradelli_milk.bmp	12	11	0	i	1	1	0.850246	3	5	2.966667	2.926667	3	day2	1
BM2_656	0	1	2	1	23	123	Goldfish.bmp	FamousAmos_small.bmp	22	21	0	i	3	1	0.59901	17	22	2.52	2.253333	3	day2	1
BM2_656	0	1	2	1	24	132	PringlesRed.bmp	Doritosranch.bmp	12	11	0	u	1	0	1.077521	7	8	2.726667	2.7	3	day2	1
BM2_656	0	1	2	1	25	140	Twix.bmp	Toberlorone.bmp	11	12	1	i	1	0	0.854301	6	3	2.76	2.966667	3	day2	1
BM2_656	0	1	2	1	26	144	3Musketeers.bmp	KitKat_small.bmp	23	24	1	u	4	1	0.930966	26	24	2	2.22	3	day2	1
BM2_656	0	1	2	1	27	147	Laysclassic.bmp	MilkyWay.bmp	13	14	1	u	2	1	1.002091	15	14	2.526667	2.566667	3	day2	1
BM2_656	0	1	2	1	28	151	FamousAmos_small.bmp	FrootLoops.bmp	21	22	1	u	3	1	0.590822	22	23	2.253333	2.253333	3	day2	1
BM2_656	0	1	2	1	29	154	PopTartsCinnamon.bmp	Hersheykisses.bmp	23	24	1	u	4	1	1.086547	29	28	1.946667	1.986667	3	day2	1
BM2_656	0	1	2	1	30	158	Hersheymilk_several.bmp	Cheezits.bmp	22	21	0	i	3	1	0.618593	21	19	2.273333	2.326667	3	day2	1
BM2_656	0	1	2	1	31	161	Milkduds.bmp	3Musketeers.bmp	24	23	0	i	4	1	0.658259	30	26	1.766667	2	3	day2	1
BM2_656	0	1	2	1	32	167	KitKat_small.bmp	PopTartsCinnamon.bmp	24	23	0	u	4	0	1.072381	24	29	2.22	1.946667	3	day2	1
BM2_656	0	1	2	1	33	170	PopTartsCinnamon.bmp	Milkduds.bmp	23	24	1	u	4	1	0.616836	29	30	1.946667	1.766667	3	day2	1
BM2_656	0	1	2	1	34	174	Ghiradelli_milk_Almonds.bmp	Twix.bmp	12	11	0	u	1	0	1.052788	9	6	2.686667	2.76	3	day2	1
BM2_656	0	1	2	1	35	179	CheesyDoritos.bmp	Chocolate_mm.bmp	13	14	1	u	2	1	0.998622	12	16	2.646667	2.52	3	day2	1
BM2_656	0	1	2	1	36	182	PringlesRed.bmp	Twix.bmp	12	11	0	u	1	0	1.014357	7	6	2.726667	2.76	3	day2	1
BM2_656	0	1	2	2	37	185	Riprolls.bmp	CheesyDoritos.bmp	14	13	0	i	2	1	0.813378	10	12	2.686667	2.646667	3	day2	1
BM2_656	0	1	2	2	38	188	KitKat_small.bmp	PopTartsCinnamon.bmp	24	23	0	i	4	1	1.013111	24	29	2.22	1.946667	3	day2	1
BM2_656	0	1	2	2	39	191	Cheezits.bmp	Hersheymilk_several.bmp	21	22	1	u	3	1	0.620149	19	21	2.326667	2.273333	3	day2	1
BM2_656	0	1	2	2	40	195	Twix.bmp	PringlesRed.bmp	11	12	1	i	1	0	1.03245	6	7	2.76	2.726667	3	day2	1
BM2_656	0	1	2	2	41	200	SourSkittles.bmp	Chocolate_mm.bmp	13	14	1	i	2	0	0.850668	13	16	2.58	2.52	3	day2	1
BM2_656	0	1	2	2	42	204	FrootLoops.bmp	FamousAmos_small.bmp	22	21	0	i	3	1	0.655351	23	22	2.253333	2.253333	3	day2	1
BM2_656	0	1	2	2	43	208	Hersheykisses.bmp	PopTartsCinnamon.bmp	24	23	0	i	4	1	0.603347	28	29	1.986667	1.946667	3	day2	1
BM2_656	0	1	2	2	44	212	ChipsAhoy_small.bmp	FrootLoops.bmp	21	22	1	u	3	1	0.56815	20	23	2.28	2.253333	3	day2	1
BM2_656	0	1	2	2	45	218	Milkduds.bmp	3Musketeers.bmp	24	23	0	i	4	1	0.646917	30	26	1.766667	2	3	day2	1
BM2_656	0	1	2	2	46	224	Ghiradelli_milk.bmp	PringlesRed.bmp	11	12	1	u	1	1	1.405679	5	7	2.926667	2.726667	3	day2	1
BM2_656	0	1	2	2	47	229	Ghiradelli_milk_Almonds.bmp	Ghiradelli_milk.bmp	12	11	0	i	1	1	0.671439	9	5	2.686667	2.926667	3	day2	1
BM2_656	0	1	2	2	48	236	FrootLoops.bmp	Cheezits.bmp	22	21	0	i	3	1	0.611257	23	19	2.253333	2.326667	3	day2	1
BM2_656	0	1	2	2	49	240	Milkduds.bmp	Butterfinger.bmp	24	23	0	i	4	1	0.623956	30	27	1.766667	1.993333	3	day2	1
BM2_656	0	1	2	2	50	250	KitKat_small.bmp	3Musketeers.bmp	24	23	0	i	4	1	0.875481	24	26	2.22	2	3	day2	1
BM2_656	0	1	2	2	51	260	Butterfinger.bmp	KitKat_small.bmp	23	24	1	u	4	1	0.854945	27	24	1.993333	2.22	3	day2	1
BM2_656	0	1	2	2	52	264	Toberlorone.bmp	Ghiradelli_milk.bmp	12	11	0	u	1	0	1.043045	3	5	2.966667	2.926667	3	day2	1
BM2_656	0	1	2	2	53	271	Doritosranch.bmp	PringlesRed.bmp	11	12	1	u	1	1	1.087495	8	7	2.7	2.726667	3	day2	1
BM2_656	0	1	2	2	54	275	ChipsAhoy_small.bmp	Hersheymilk_several.bmp	21	22	1	u	3	1	0.819541	20	21	2.28	2.273333	3	day2	1
BM2_656	0	1	2	2	55	279	Laysclassic.bmp	Chocolate_mm.bmp	13	14	1	u	2	1	0.592302	15	16	2.526667	2.52	3	day2	1
[truncated: 22,638 more rows]
